# Supplementary material for: The COVID-19 Pandemic and Associated Inequities in Acute Myocardial Infarction Treatment and Outcomes
Source: PubMed Central journal article supplement (PMC10457721; doi:10.1001/jamanetworkopen.2023.30327), 2023-08-25
Supplement: jamanetwopen-e2330327-s001.pdf [file jamanetwopen-e2330327-s001.pdf]

## Supplemental Online Content

Glance LG, Joynt Maddox KE, Shang J, et al. The COVID-19 pandemic and associated inequities in acute myocardial infarction treatment and outcomes. *JAMA Netw Open*. 2023;6(8):e2330327. doi:10.1001/jamanetworkopen.2023.30327

**eFigure 1.** Flow Diagram Describing Selection of Admissions in Analytic Cohort

**eFigure 2.** Changes in Outcomes in Patients With Non–ST Segment Elevation Myocardial Infarction by Hospital COVID-19 Burden

**eTable 1.** Codes Used to Identify Patient Cohorts, Comorbidities, and COVID-19

**eTable 2.** Hospital Characteristics

**eTable 3.** Mortality at 30 d

**eTable 4.** Readmission at 30 d

**eTable 5.** Nonhome Discharges

**eTable 6.** Revascularization

**eTable 7.** Mortality at 30 d With Interaction of Race and Ethnicity and Hospital COVID-19 Burden

**eTable 8.** Readmission at 30 d With Interaction of Race and Ethnicity and Hospital COVID-19 Burden

**eTable 9.** Nonhome Discharges With Interaction of Race and Ethnicity and Hospital COVID-19 Burden

**eTable 10.** Revascularization With Interaction of Race and Ethnicity and Hospital COVID-19 Burden

This supplemental material has been provided by the authors to give readers additional information about their work.

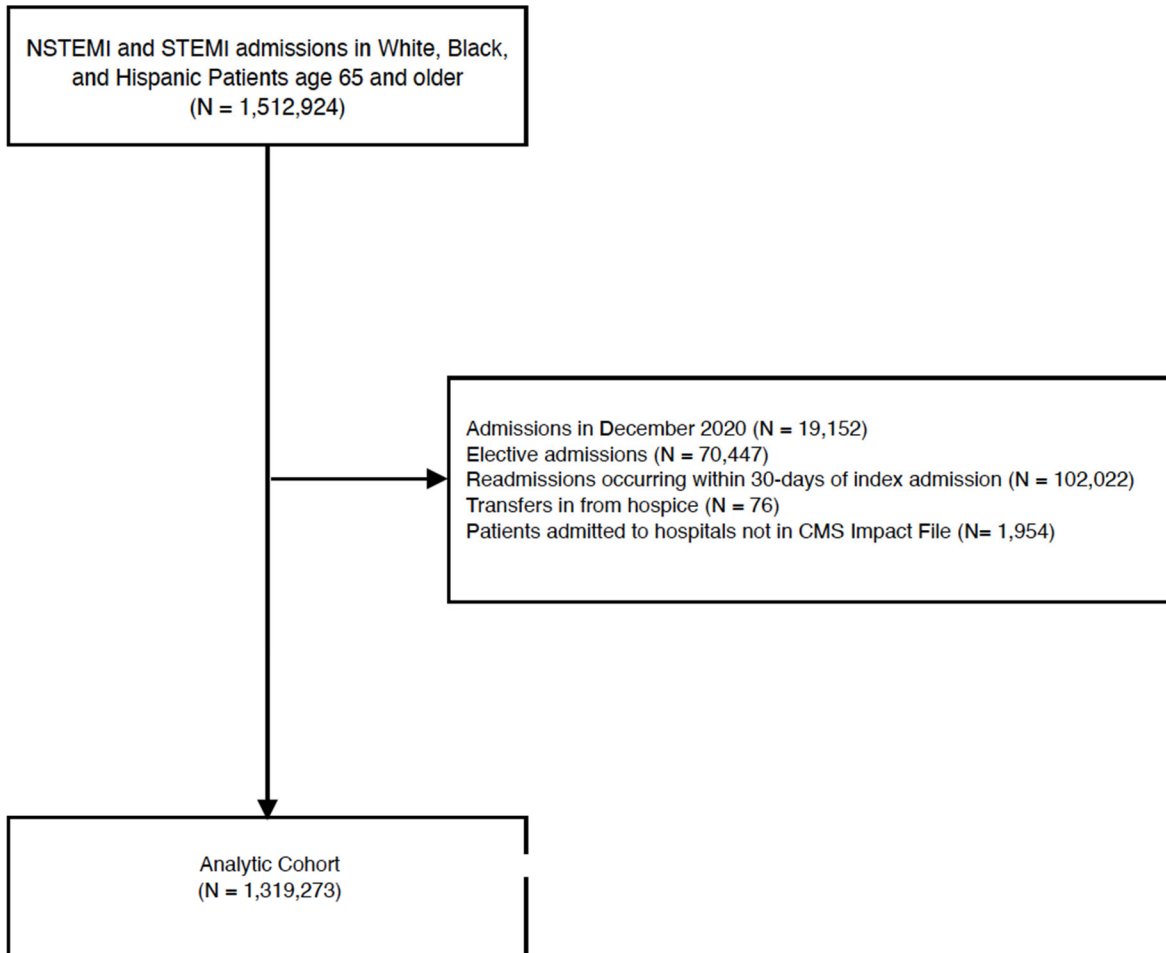

**eFigure 1.** Flow diagram describing the selection of cases in the analytic cohort.

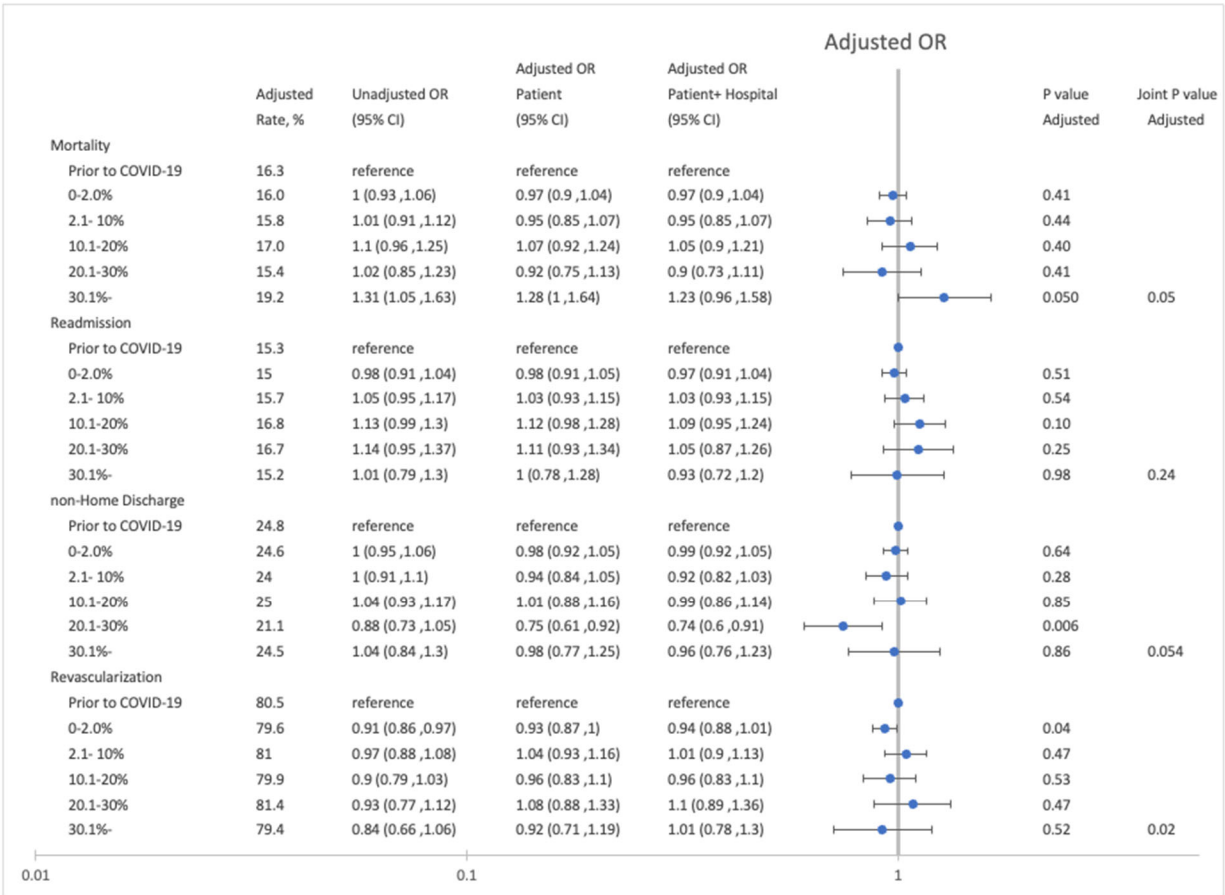

**eFigure 2.** Changes in Mortality, Readmissions, Non-Home Discharges, and Revascularization in STEMI Patients as a Function of the Hospital COVID-19 Burden.

The *Patient Model* was adjusted for patient risk (see text), and the *Patient + Hospital Model* was adjusted for patient risk and hospital characteristics (see text). The *Unadjusted Model* was adjusted for the patient age, race, and ethnicity. P values and adjusted rates are based on the *Patient Model*.

|                                          |                              |
|------------------------------------------|------------------------------|
| AM classification                        |                              |
| STEMI                                    |                              |
| Anterior wall                            | I210, I220                   |
| Inferior wall                            | I211, I221                   |
| lateral wall & other sites               | I212, I228                   |
| unspecified                              | I213, I229                   |
| NSTEMI                                   |                              |
| AMI, unspecified                         | I219                         |
| Other types of MI                        | I21A                         |
| Body mass index                          |                              |
| Underweight                              | Z681                         |
| Morbid obesity                           | Z684                         |
| Congestive heart failure                 |                              |
| Diastolic                                | I503                         |
| Systolic                                 | I502                         |
| Systolic & diastolic                     | I504                         |
| unspecified                              | I501, I5089, I509            |
| Right heart failure                      | I5081                        |
| Biventricular failure                    | I5082                        |
| End-stage heart failure                  | I5084                        |
| Complications of AMI                     |                              |
| Ventricular septal defect                | I232                         |
| Ventricular rupture                      | I233                         |
| Rupture of papillary muscle              | I235                         |
| Prior cardiac surgery or procedure       |                              |
| PCI                                      | Z955, Z9861                  |
| CABG                                     | Z951                         |
| Heart valve surgery                      | Z95.2; Z95.3; Z95.4          |
| AICD                                     | Z95810                       |
| Dialysis                                 | Z992                         |
| Revascularization during hospitalization |                              |
| CABG                                     | 0210, 0211, 0212, 0213       |
| PCI                                      | 0270, 0271, 0272, 0273, 0274 |
| Functional status                        |                              |
| Wheel-chair                              | Z993                         |
| Supplemental oxygen                      | Z9981                        |
| Dependent on provider                    | Z74                          |
| COVID-19                                 | U071                         |

**eTable 1.** ICD-10-CM codes used to identify patient cohorts, comorbidities, and COVID-19.

| <b>eTable 2. Hospital Characteristics</b>      |                           |
|------------------------------------------------|---------------------------|
| <b>Characteristics</b>                         | <b>Hospitals, No. (%)</b> |
| <b>Total number of beds</b>                    |                           |
| <50                                            | 440 (14.3)                |
| 51-149                                         | 1,117 (36.3)              |
| 150-249                                        | 651 (21.2)                |
| 250-499                                        | 651 (21.2)                |
| 500-                                           | 219 (7.1)                 |
| <b>Resident-to-bed ratio</b>                   |                           |
| 0                                              | 1,995 (64.8)              |
| >0-0.10                                        | 515 (16.7)                |
| 0.11-0.20                                      | 198 (6.4)                 |
| 0.21-0.40                                      | 190 (6.2)                 |
| 0.41-                                          | 180 (5.9)                 |
| <b>Rurality</b>                                |                           |
| Rural hospital                                 | 756 (24.6)                |
| Large urban hospital                           | 1,258 (40.9)              |
| Other urban hospital                           | 1,064 (34.6)              |
| <b>Region</b>                                  |                           |
| New England                                    | 129 (4.2)                 |
| Middle Atlantic                                | 346 (11.2)                |
| South Atlantic                                 | 555 (18)                  |
| East North Central                             | 469 (15.2)                |
| East South Central                             | 280 (9.1)                 |
| West North Central                             | 232 (7.5)                 |
| West South Central                             | 430 (14)                  |
| Mountain                                       | 205 (6.7)                 |
| Pacific                                        | 383 (12.4)                |
| Puerto Rico                                    | 49 (1.6)                  |
| <b>Disproportionate share percentage (DSH)</b> |                           |
| 0-9.9%                                         | 199 (6.5)                 |
| 10.0-24.9%                                     | 1,057 (34.3)              |
| 25.0-49.9%                                     | 1,473 (47.9)              |
| 50.0%-                                         | 349 (11.3)                |
| <b>Proportion of minority patients (AMI)</b>   |                           |
| <5%                                            | 1,071 (34.8)              |
| 5.0-9.9%                                       | 470 (15.3)                |
| 10.0-24.9                                      | 689 (22.4)                |
| 25.0-49.9%                                     | 490 (15.9)                |
| 50.0%-                                         | 358 (11.6)                |
| <b>Volume of AMI hospitalizations</b>          |                           |
| <200                                           | 1,521 (49.4)              |
| 200-499                                        | 550 (17.9)                |
| 500-999                                        | 644 (20.9)                |
| 1000-1999                                      | 315 (10.2)                |
| 2000-                                          | 48 (1.6)                  |

**eTable 3. 30-day Mortality for STEMI and NSTEMI**

|                                       | Unadjusted        |       |                   |       | Patient Characteristics |       |                   |       | Patient and Hospital Characteristics |       |                   |       |
|---------------------------------------|-------------------|-------|-------------------|-------|-------------------------|-------|-------------------|-------|--------------------------------------|-------|-------------------|-------|
|                                       | STEMI             |       | NSTEMI            |       | STEMI                   |       | NSTEMI            |       | STEMI                                |       | NSTEMI            |       |
|                                       | OR (95% CI)       | P     | OR (95% CI)       | P     | OR (95% CI)             | P     | OR (95% CI)       | P     | OR (95% CI)                          | P     | OR (95% CI)       | P     |
| <b>Race</b>                           |                   |       |                   |       |                         |       |                   |       |                                      |       |                   |       |
| White                                 | reference         |       |                   |       | reference               |       |                   |       | reference                            |       | reference         |       |
| Black                                 | 1.28 (1.23, 1.34) | 0.000 | 0.99 (0.97, 1.02) | 0.69  | 0.94 (0.9, 0.99)        | 0.02  | 0.79 (0.77, 0.82) | 0.000 | 0.91 (0.87, 0.96)                    | 0.000 | 0.78 (0.76, 0.81) | 0.000 |
| Hispanic                              | 1.24 (1.19, 1.3)  | 0.000 | 1.07 (1.03, 1.11) | 0.000 | 1.11 (1.05, 1.18)       | 0.000 | 1.03 (0.98, 1.09) | 0.22  | 1.05 (1, 1.11)                       | 0.07  | 0.98 (0.94, 1.02) | 0.33  |
| <b>Age</b>                            |                   |       |                   |       |                         |       |                   |       |                                      |       |                   |       |
| 65-69                                 | reference         |       |                   |       | reference               |       |                   |       | reference                            |       | reference         |       |
| 70-74                                 | 1.16 (1.12, 1.2)  | 0.000 | 0.97 (0.94, 0.99) | 0.02  | 1.24 (1.2, 1.29)        | 0.000 | 1.17 (1.14, 1.2)  | 0.000 | 1.24 (1.2, 1.29)                     | 0.000 | 1.17 (1.13, 1.2)  | 0.000 |
| 75-79                                 | 1.52 (1.47, 1.57) | 0.000 | 1.28 (1.25, 1.31) | 0.000 | 1.59 (1.54, 1.65)       | 0.000 | 1.45 (1.42, 1.49) | 0.000 | 1.59 (1.54, 1.65)                    | 0.000 | 1.45 (1.41, 1.49) | 0.000 |
| 80-84                                 | 2.13 (2.06, 2.2)  | 0.000 | 1.74 (1.7, 1.79)  | 0.000 | 2.18 (2.11, 2.27)       | 0.000 | 1.9 (1.85, 1.96)  | 0.000 | 2.18 (2.1, 2.26)                     | 0.000 | 1.9 (1.85, 1.95)  | 0.000 |
| 85-89                                 | 3.17 (3.06, 3.28) | 0.000 | 2.53 (2.48, 2.59) | 0.000 | 3.18 (3.06, 3.31)       | 0.000 | 2.65 (2.58, 2.72) | 0.000 | 3.18 (3.05, 3.31)                    | 0.000 | 2.64 (2.57, 2.71) | 0.000 |
| 90-94                                 | 4.77 (4.59, 4.96) | 0.000 | 3.71 (3.61, 3.81) | 0.000 | 4.84 (4.63, 5.07)       | 0.000 | 3.82 (3.71, 3.94) | 0.000 | 4.84 (4.62, 5.06)                    | 0.000 | 3.79 (3.68, 3.91) | 0.000 |
| 95-                                   | 7.29 (6.87, 7.73) | 0.000 | 5.5 (5.32, 5.69)  | 0.000 | 7.51 (7.01, 8.05)       | 0.000 | 5.58 (5.36, 5.8)  | 0.000 | 7.47 (6.97, 8)                       | 0.000 | 5.52 (5.31, 5.74) | 0.000 |
| <b>Hospital Covid-19 burden</b>       |                   |       |                   |       |                         |       |                   |       |                                      |       |                   |       |
| Before Covid-19                       | reference         |       |                   |       | reference               |       |                   |       | reference                            |       | reference         |       |
| 0.0-2.0%                              | 1 (0.93, 1.06)    | 0.91  | 0.94 (0.9, 0.98)  | 0.004 | 0.97 (0.9, 1.04)        | 0.41  | 0.93 (0.89, 0.98) | 0.003 | 0.97 (0.9, 1.04)                     | 0.39  | 0.93 (0.89, 0.98) | 0.003 |
| 2.1-10.0%                             | 1.01 (0.91, 1.12) | 0.86  | 0.99 (0.93, 1.07) | 0.86  | 0.95 (0.85, 1.07)       | 0.44  | 0.96 (0.89, 1.03) | 0.27  | 0.95 (0.85, 1.07)                    | 0.43  | 0.97 (0.9, 1.04)  | 0.42  |
| 10.1-20.0%                            | 1.1 (0.96, 1.25)  | 0.17  | 1.15 (1.06, 1.25) | 0.001 | 1.07 (0.92, 1.24)       | 0.40  | 1.1 (1.01, 1.21)  | 0.04  | 1.05 (0.9, 1.21)                     | 0.55  | 1.09 (1, 1.19)    | 0.06  |
| 20.1-30.0%                            | 1.02 (0.85, 1.23) | 0.83  | 1.25 (1.1, 1.42)  | 0.001 | 0.92 (0.75, 1.13)       | 0.41  | 1.21 (1.05, 1.38) | 0.007 | 0.9 (0.73, 1.11)                     | 0.32  | 1.19 (1.04, 1.36) | 0.01  |
| 30.1%-                                | 1.31 (1.05, 1.63) | 0.02  | 1.56 (1.34, 1.8)  | 0.000 | 1.28 (1, 1.64)          | 0.05  | 1.51 (1.29, 1.76) | 0.000 | 1.23 (0.96, 1.58)                    | 0.10  | 1.46 (1.25, 1.71) | 0.000 |
| <b>Sex</b>                            |                   |       |                   |       |                         |       |                   |       |                                      |       |                   |       |
| Male                                  |                   |       |                   |       | reference               |       |                   |       | reference                            |       | reference         |       |
| Female                                |                   |       |                   |       | 1.17 (1.15, 1.2)        | 0.000 | 0.93 (0.92, 0.95) | 0.000 | 1.17 (1.15, 1.2)                     | 0.000 | 0.93 (0.92, 0.95) | 0.000 |
| <b>Urgency</b>                        |                   |       |                   |       |                         |       |                   |       |                                      |       |                   |       |
| Urgent                                |                   |       |                   |       | 0.91 (0.87, 0.95)       | 0.000 | 0.87 (0.84, 0.9)  | 0.000 | 0.91 (0.88, 0.95)                    | 0.000 | 0.87 (0.84, 0.89) | 0.000 |
| Emergent                              |                   |       |                   |       | reference               |       |                   |       | reference                            |       | reference         |       |
| <b>Admission source</b>               |                   |       |                   |       |                         |       |                   |       |                                      |       |                   |       |
| Community                             |                   |       |                   |       | reference               |       |                   |       | reference                            |       | reference         |       |
| Hospital                              |                   |       |                   |       | 1.08 (1.03, 1.13)       | 0.001 | 1.08 (1.04, 1.12) | 0.000 | 1.1 (1.05, 1.15)                     | 0.000 | 1.14 (1.1, 1.18)  | 0.000 |
| SNF/Nursing Home                      |                   |       |                   |       | 2.13 (1.92, 2.35)       | 0.000 | 1.81 (1.72, 1.9)  | 0.000 | 2.15 (1.95, 2.38)                    | 0.000 | 1.84 (1.75, 1.94) | 0.000 |
| Other                                 |                   |       |                   |       | 1.12 (1.02, 1.22)       | 0.01  | 1.23 (1.15, 1.31) | 0.000 | 1.12 (1.03, 1.22)                    | 0.01  | 1.25 (1.18, 1.33) | 0.000 |
| Dual-eligible                         |                   |       |                   |       | 1.05 (1.01, 1.09)       | 0.000 | 0.92 (0.89, 0.94) | 0.000 | 1.03 (1, 1.07)                       | 0.000 | 0.91 (0.89, 0.93) | 0.000 |
| <b>Body Mass Index</b>                |                   |       |                   |       |                         |       |                   |       |                                      |       |                   |       |
| Underweight                           |                   |       |                   |       | 1.02 (0.92, 1.13)       | 0.77  | 1.18 (1.13, 1.24) | 0.000 | 1.02 (0.92, 1.13)                    | 0.75  | 1.19 (1.13, 1.24) | 0.000 |
| Morbid obesity                        |                   |       |                   |       | 1.15 (1.07, 1.23)       | 0.000 | 1 (0.96, 1.04)    | 0.95  | 1.15 (1.07, 1.23)                    | 0.000 | 1 (0.96, 1.04)    | 0.99  |
| <b>Myocardial infarction location</b> |                   |       |                   |       |                         |       |                   |       |                                      |       |                   |       |
| Inferior wall                         |                   |       |                   |       | reference               |       | NA                |       | reference                            |       | NA                |       |
| Anterior wall                         |                   |       |                   |       | 1.38 (1.35, 1.42)       | 0.000 | NA                |       | 1.38 (1.35, 1.42)                    | 0.000 | NA                |       |
| Lateral wall                          |                   |       |                   |       | 1.4 (1.34, 1.47)        | 0.000 | NA                |       | 1.4 (1.34, 1.46)                     | 0.000 | NA                |       |
| Unspecified                           |                   |       |                   |       | 1.93 (1.87, 1.99)       | 0.000 | NA                |       | 1.9 (1.84, 1.96)                     | 0.000 | NA                |       |

|                              | Unadjusted  |   |             |   | Patient Characteristics |       |                   |       | Patient and Hospital Characteristics |       |                   |       |
|------------------------------|-------------|---|-------------|---|-------------------------|-------|-------------------|-------|--------------------------------------|-------|-------------------|-------|
|                              | STEMI       |   | NSTEMI      |   | STEMI                   |       | NSTEMI            |       | STEMI                                |       | NSTEMI            |       |
|                              | OR (95% CI) | P | OR (95% CI) | P | OR (95% CI)             | P     | OR (95% CI)       | P     | OR (95% CI)                          | P     | OR (95% CI)       | P     |
| Congestive heart failure     |             |   |             |   |                         |       |                   |       |                                      |       |                   |       |
| Systolic                     |             |   |             |   | 1.29 (1.24 ,1.33)       | 0.000 | 2.32 (2.27 ,2.37) | 0.000 | 1.29 (1.24 ,1.34)                    | 0.000 | 2.34 (2.28 ,2.39) | 0.000 |
| Diastolic                    |             |   |             |   | 0.88 (0.83 ,0.93)       | 0.000 | 1.42 (1.38 ,1.46) | 0.000 | 0.88 (0.84 ,0.94)                    | 0.000 | 1.43 (1.4 ,1.47)  | 0.000 |
| Systolic & Diastolic         |             |   |             |   | 1.15 (1.08 ,1.22)       | 0.000 | 2.11 (2.04 ,2.17) | 0.000 | 1.15 (1.08 ,1.22)                    | 0.000 | 2.12 (2.06 ,2.19) | 0.000 |
| Unspecified                  |             |   |             |   | 2.32 (2.21 ,2.44)       | 0.000 | 2.54 (2.47 ,2.62) | 0.000 | 2.3 (2.19 ,2.41)                     | 0.000 | 2.5 (2.43 ,2.58)  | 0.000 |
| Right heart failure          |             |   |             |   | 4.23 (3.47 ,5.15)       | 0.000 | 3.1 (2.64 ,3.64)  | 0.000 | 4.24 (3.48 ,5.17)                    | 0.000 | 3.12 (2.65 ,3.66) | 0.000 |
| Biventricular heart failure  |             |   |             |   | 4.21 (3.35 ,5.29)       | 0.000 | 2.34 (2.01 ,2.73) | 0.000 | 4.26 (3.4 ,5.34)                     | 0.000 | 2.4 (2.06 ,2.78)  | 0.000 |
| End-stage heart failure      |             |   |             |   | 2.74 (1.89 ,3.98)       | 0.000 | 2.91 (2.5 ,3.38)  | 0.000 | 2.73 (1.88 ,3.96)                    | 0.000 | 2.91 (2.5 ,3.38)  | 0.000 |
| Complications of AMI         |             |   |             |   |                         |       |                   |       |                                      |       |                   |       |
| Ventricular septal defect    |             |   |             |   | 20.8 (16.3 ,26.4)       | 0.000 | 24.3 (14.2 ,41.8) | 0.000 | 20.9 (16.4 ,26.5)                    | 0.000 | 24.9 (14.5 ,42.7) | 0.000 |
| LV rupture                   |             |   |             |   | 34.8 (25.2 ,48.1)       | 0.000 | 42.1 (22.4 ,79.1) | 0.000 | 35.2 (25.5 ,48.6)                    | 0.000 | 42.1 (22.4 ,79)   | 0.000 |
| Papillary muscle rupture     |             |   |             |   | 10.6 (7.2 ,15.7)        | 0.000 | 7.5 (4.5 ,12.5)   | 0.000 | 10.7 (7.3 ,15.8)                     | 0.000 | 7.8 (4.7 ,13)     | 0.000 |
| Prior procedures             |             |   |             |   |                         |       |                   |       |                                      |       |                   |       |
| PCI                          |             |   |             |   | 0.82 (0.8 ,0.85)        | 0.000 | 0.73 (0.72 ,0.75) | 0.000 | 0.82 (0.8 ,0.85)                     | 0.000 | 0.74 (0.72 ,0.75) | 0.000 |
| CABG                         |             |   |             |   | 1.15 (1.1 ,1.2)         | 0.000 | 0.99 (0.97 ,1.01) | 0.47  | 1.15 (1.09 ,1.2)                     | 0.000 | 0.99 (0.97 ,1.01) | 0.33  |
| Heart valve surgery          |             |   |             |   | 1.37 (1.25 ,1.51)       | 0.000 | 1.02 (0.98 ,1.07) | 0.27  | 1.38 (1.25 ,1.52)                    | 0.000 | 1.03 (0.99 ,1.08) | 0.12  |
| Dialysis                     |             |   |             |   | 2.59 (2.38 ,2.83)       | 0.000 | 2.12 (2.04 ,2.2)  | 0.000 | 2.59 (2.37 ,2.82)                    | 0.000 | 2.12 (2.04 ,2.21) | 0.000 |
| AICD                         |             |   |             |   | 0.99 (0.88 ,1.1)        | 0.82  | 0.81 (0.78 ,0.85) | 0.000 | 0.99 (0.88 ,1.1)                     | 0.81  | 0.81 (0.78 ,0.85) | 0.000 |
| COVID                        |             |   |             |   | 2.64 (2.08 ,3.35)       | 0.000 | 2.18 (1.82 ,2.61) | 0.000 | 2.64 (2.09 ,3.35)                    | 0.000 | 2.17 (1.81 ,2.59) | 0.000 |
| Functional Status            |             |   |             |   |                         |       |                   |       |                                      |       |                   |       |
| Wheel-chair                  |             |   |             |   | 1.34 (1.12 ,1.6)        | 0.001 | 1.25 (1.15 ,1.36) | 0.000 | 1.35 (1.13 ,1.61)                    | 0.001 | 1.27 (1.17 ,1.38) | 0.000 |
| Supplemental oxygen          |             |   |             |   | 1.4 (1.29 ,1.52)        | 0.000 | 1.38 (1.34 ,1.43) | 0.000 | 1.4 (1.29 ,1.51)                     | 0.000 | 1.38 (1.33 ,1.43) | 0.000 |
| Dependent on provider        |             |   |             |   | 2.15 (1.81 ,2.56)       | 0.000 | 2.19 (2.03 ,2.37) | 0.000 | 2.12 (1.78 ,2.52)                    | 0.000 | 2.14 (1.98 ,2.31) | 0.000 |
| Elixhauser comorbidities     |             |   |             |   |                         |       |                   |       |                                      |       |                   |       |
| Cardiac arrhythmias          |             |   |             |   | 1.57 (1.54 ,1.61)       | 0.000 | 1.17 (1.16 ,1.19) | 0.000 | 1.58 (1.54 ,1.61)                    | 0.000 | 1.18 (1.16 ,1.2)  | 0.000 |
| Valvular heart disease       |             |   |             |   | 0.93 (0.9 ,0.97)        | 0.000 | 1.06 (1.04 ,1.08) | 0.000 | 0.94 (0.91 ,0.97)                    | 0.000 | 1.07 (1.05 ,1.09) | 0.000 |
| Pulmonary circulation        |             |   |             |   | 1.16 (1.1 ,1.22)        | 0.000 | 1.12 (1.09 ,1.14) | 0.000 | 1.16 (1.1 ,1.22)                     | 0.000 | 1.12 (1.09 ,1.15) | 0.000 |
| Peripheral vascular disorder |             |   |             |   | 1.34 (1.3 ,1.39)        | 0.000 | 1.16 (1.14 ,1.19) | 0.000 | 1.35 (1.3 ,1.4)                      | 0.000 | 1.17 (1.15 ,1.2)  | 0.000 |
| Hypertension, uncomplicated  |             |   |             |   | 0.66 (0.64 ,0.68)       | 0.000 | 0.66 (0.64 ,0.68) | 0.000 | 0.66 (0.64 ,0.68)                    | 0.000 | 0.66 (0.65 ,0.68) | 0.000 |
| Hypertension, complicated    |             |   |             |   | 0.67 (0.64 ,0.69)       | 0.000 | 0.69 (0.67 ,0.71) | 0.000 | 0.67 (0.64 ,0.69)                    | 0.000 | 0.69 (0.67 ,0.71) | 0.000 |
| Paralysis                    |             |   |             |   | 1.59 (1.37 ,1.84)       | 0.000 | 1.63 (1.49 ,1.78) | 0.000 | 1.58 (1.36 ,1.83)                    | 0.000 | 1.63 (1.49 ,1.79) | 0.000 |
| Neurologic disorder, other   |             |   |             |   | 3.43 (3.3 ,3.56)        | 0.000 | 2.23 (2.18 ,2.28) | 0.000 | 3.44 (3.31 ,3.57)                    | 0.000 | 2.23 (2.18 ,2.28) | 0.000 |
| Chronic pulmonary disease    |             |   |             |   | 1.12 (1.09 ,1.15)       | 0.000 | 1.11 (1.09 ,1.12) | 0.000 | 1.12 (1.08 ,1.15)                    | 0.000 | 1.1 (1.08 ,1.12)  | 0.000 |
| Diabetes, uncomplicated      |             |   |             |   | 1.21 (1.17 ,1.25)       | 0.000 | 1.07 (1.05 ,1.09) | 0.000 | 1.21 (1.17 ,1.24)                    | 0.000 | 1.06 (1.04 ,1.09) | 0.000 |

|                                         | Unadjusted  |   |             |   | Patient Characteristics |       |                   |       | Patient and Hospital Characteristics |       |                   |       |
|-----------------------------------------|-------------|---|-------------|---|-------------------------|-------|-------------------|-------|--------------------------------------|-------|-------------------|-------|
|                                         | STEMI       |   | NSTEMI      |   | STEMI                   |       | NSTEMI            |       | STEMI                                |       | NSTEMI            |       |
|                                         | OR (95% CI) | P | OR (95% CI) | P | OR (95% CI)             | P     | OR (95% CI)       | P     | OR (95% CI)                          | P     | OR (95% CI)       | P     |
| Diabetes, complicated                   |             |   |             |   | 1.29 (1.25, 1.33)       | 0.000 | 1.11 (1.09, 1.13) | 0.000 | 1.29 (1.25, 1.33)                    | 0.000 | 1.11 (1.09, 1.14) | 0.000 |
| Hypothyroidism                          |             |   |             |   | 0.85 (0.82, 0.87)       | 0.000 | 0.88 (0.87, 0.9)  | 0.000 | 0.85 (0.82, 0.87)                    | 0.000 | 0.88 (0.87, 0.9)  | 0.000 |
| Renal failure                           |             |   |             |   | 1.25 (1.2, 1.29)        | 0.000 | 1.37 (1.34, 1.4)  | 0.000 | 1.25 (1.21, 1.3)                     | 0.000 | 1.37 (1.35, 1.4)  | 0.000 |
| Liver disease                           |             |   |             |   | 2.67 (2.54, 2.82)       | 0.000 | 2.32 (2.24, 2.4)  | 0.000 | 2.68 (2.55, 2.83)                    | 0.000 | 2.34 (2.25, 2.42) | 0.000 |
| Peptic ulcer disease                    |             |   |             |   | 0.8 (0.67, 0.95)        | 0.01  | 0.85 (0.78, 0.92) | 0.000 | 0.8 (0.67, 0.95)                     | 0.01  | 0.86 (0.79, 0.93) | 0.000 |
| AIDS/HIV                                |             |   |             |   | 1.09 (0.71, 1.7)        | 0.69  | 1.19 (0.91, 1.56) | 0.21  | 1.09 (0.7, 1.7)                      | 0.69  | 1.23 (0.94, 1.61) | 0.13  |
| Lymphoma                                |             |   |             |   | 1.33 (1.16, 1.53)       | 0.000 | 1.25 (1.16, 1.34) | 0.000 | 1.34 (1.16, 1.54)                    | 0.000 | 1.26 (1.18, 1.36) | 0.000 |
| Metastatic cancer                       |             |   |             |   | 2.56 (2.32, 2.83)       | 0.000 | 2.96 (2.81, 3.11) | 0.000 | 2.57 (2.32, 2.83)                    | 0.000 | 2.97 (2.82, 3.13) | 0.000 |
| Solid tumor                             |             |   |             |   | 1.59 (1.49, 1.69)       | 0.000 | 1.56 (1.51, 1.63) | 0.000 | 1.59 (1.49, 1.69)                    | 0.000 | 1.57 (1.51, 1.63) | 0.000 |
| Rheumatoid arthritis                    |             |   |             |   | 0.93 (0.87, 1)          | 0.048 | 0.98 (0.95, 1.02) | 0.40  | 0.94 (0.88, 1)                       | 0.06  | 0.99 (0.95, 1.03) | 0.62  |
| Coagulopathy                            |             |   |             |   | 1.4 (1.33, 1.48)        | 0.000 | 1.3 (1.26, 1.33)  | 0.000 | 1.41 (1.33, 1.48)                    | 0.000 | 1.3 (1.26, 1.34)  | 0.000 |
| Weight loss                             |             |   |             |   | 1.35 (1.26, 1.45)       | 0.000 | 1.88 (1.81, 1.94) | 0.000 | 1.35 (1.26, 1.45)                    | 0.000 | 1.88 (1.82, 1.95) | 0.000 |
| Fluid and electrolyte disorder          |             |   |             |   | 2.62 (2.54, 2.69)       | 0.000 | 1.94 (1.91, 1.97) | 0.000 | 2.61 (2.54, 2.69)                    | 0.000 | 1.94 (1.91, 1.97) | 0.000 |
| Anemia, blood loss                      |             |   |             |   | 0.83 (0.71, 0.98)       | 0.03  | 0.91 (0.84, 0.99) | 0.02  | 0.83 (0.7, 0.97)                     | 0.019 | 0.91 (0.84, 0.99) | 0.02  |
| Anemia, deficiency                      |             |   |             |   | 0.73 (0.68, 0.79)       | 0.000 | 0.85 (0.82, 0.88) | 0.000 | 0.73 (0.68, 0.79)                    | 0.000 | 0.86 (0.83, 0.89) | 0.000 |
| Alcohol abuse                           |             |   |             |   | 0.99 (0.91, 1.07)       | 0.81  | 0.85 (0.8, 0.89)  | 0.000 | 0.99 (0.91, 1.07)                    | 0.78  | 0.85 (0.8, 0.89)  | 0.000 |
| Drug abuse                              |             |   |             |   | 0.74 (0.66, 0.84)       | 0.000 | 0.77 (0.72, 0.84) | 0.000 | 0.74 (0.66, 0.84)                    | 0.000 | 0.78 (0.72, 0.84) | 0.000 |
| Psychoses                               |             |   |             |   | 1.33 (1.12, 1.57)       | 0.001 | 1.09 (0.99, 1.2)  | 0.07  | 1.32 (1.12, 1.56)                    | 0.001 | 1.09 (0.99, 1.2)  | 0.07  |
| Depression                              |             |   |             |   | 0.86 (0.82, 0.89)       | 0.000 | 0.93 (0.91, 0.95) | 0.000 | 0.86 (0.82, 0.9)                     | 0.000 | 0.94 (0.91, 0.96) | 0.000 |
| Volume of AMI hospitalizations          |             |   |             |   |                         |       |                   |       |                                      |       |                   |       |
| <200                                    |             |   |             |   |                         |       |                   |       | reference                            |       | reference         |       |
| 200-499                                 |             |   |             |   |                         |       |                   |       | 0.83 (0.78, 0.89)                    | 0.000 | 0.92 (0.89, 0.96) | 0.000 |
| 500-999                                 |             |   |             |   |                         |       |                   |       | 0.85 (0.79, 0.9)                     | 0.000 | 0.91 (0.88, 0.95) | 0.000 |
| 1000-1999                               |             |   |             |   |                         |       |                   |       | 0.84 (0.79, 0.9)                     | 0.000 | 0.88 (0.85, 0.92) | 0.000 |
| 2000-                                   |             |   |             |   |                         |       |                   |       | 0.8 (0.73, 0.87)                     | 0.000 | 0.82 (0.77, 0.88) | 0.000 |
| Proportion of minority patients (AMI)   |             |   |             |   |                         |       |                   |       |                                      |       |                   |       |
| <5%                                     |             |   |             |   |                         |       |                   |       | reference                            |       | reference         |       |
| 5.0-9.9%                                |             |   |             |   |                         |       |                   |       | 1 (0.95, 1.05)                       | 0.99  | 1 (0.97, 1.04)    | 0.966 |
| 10.0-24.9                               |             |   |             |   |                         |       |                   |       | 1.07 (1.03, 1.11)                    | 0.001 | 1.05 (1.02, 1.09) | 0.003 |
| 25.0-49.9%                              |             |   |             |   |                         |       |                   |       | 1.04 (0.99, 1.1)                     | 0.10  | 1.05 (1.01, 1.09) | 0.023 |
| 50.0%-                                  |             |   |             |   |                         |       |                   |       | 1.21 (1.1, 1.32)                     | 0.000 | 1.24 (1.15, 1.32) | 0.000 |
| Disproportionate share percentage (DSH) |             |   |             |   |                         |       |                   |       |                                      |       |                   |       |
| 0-9.9%                                  |             |   |             |   |                         |       |                   |       | reference                            |       | reference         |       |
| 10.0-24.9%                              |             |   |             |   |                         |       |                   |       | 1.03 (0.96, 1.11)                    | 0.37  | 1.03 (0.96, 1.09) | 0.41  |
| 25.0-49.9%                              |             |   |             |   |                         |       |                   |       | 1.1 (1.02, 1.18)                     | 0.02  | 1.07 (1, 1.14)    | 0.04  |
| 50.0%-                                  |             |   |             |   |                         |       |                   |       | 1.08 (0.98, 1.19)                    | 0.12  | 0.98 (0.9, 1.06)  | 0.56  |
| Resident-to-bed ratio                   |             |   |             |   |                         |       |                   |       |                                      |       |                   |       |
| 0                                       |             |   |             |   |                         |       |                   |       | reference                            |       | reference         |       |
| >0-0.10                                 |             |   |             |   |                         |       |                   |       | 0.96 (0.92, 1)                       | 0.04  | 0.97 (0.95, 1)    | 0.09  |
| 0.11-0.20                               |             |   |             |   |                         |       |                   |       | 0.96 (0.92, 1.01)                    | 0.16  | 0.97 (0.94, 1.01) | 0.17  |
| 0.21-0.40                               |             |   |             |   |                         |       |                   |       | 0.95 (0.9, 1)                        | 0.07  | 0.9 (0.86, 0.94)  | 0.000 |
| 0.41-                                   |             |   |             |   |                         |       |                   |       | 0.97 (0.92, 1.03)                    | 0.33  | 0.85 (0.8, 0.89)  | 0.000 |



|                      | Unadjusted        |       |                   |       | Patient Characteristics |       |                   |       | Patient and Hospital Characteristics |       |                   |       |
|----------------------|-------------------|-------|-------------------|-------|-------------------------|-------|-------------------|-------|--------------------------------------|-------|-------------------|-------|
|                      | STEMI             |       | NSTEMI            |       | STEMI                   |       | NSTEMI            |       | STEMI                                |       | NSTEMI            |       |
|                      | OR (95% CI)       | P     | OR (95% CI)       | P     | OR (95% CI)             | P     | OR (95% CI)       | P     | OR (95% CI)                          | P     | OR (95% CI)       | P     |
| Rurality             |                   |       |                   |       |                         |       |                   |       |                                      |       |                   |       |
| Rural hospital       |                   |       |                   |       |                         |       |                   |       | reference                            |       | reference         |       |
| Large urban hospital |                   |       |                   |       |                         |       |                   |       | 0.89 (0.84 ,0.95)                    | 0.000 | 0.84 (0.8 ,0.88)  | 0.000 |
| Other urban hospital |                   |       |                   |       |                         |       |                   |       | 0.97 (0.91 ,1.02)                    | 0.25  | 0.91 (0.87 ,0.95) | 0.000 |
| Time                 | 1 (1 ,1)          | 0.008 | 1 (1 ,1)          | 0.000 | 1 (1 ,1)                | 0.000 | 1 (1 ,1)          | 0.000 | 1 (1 ,1)                             | 0.000 | 1 (1 ,1)          | 0.000 |
| Admission month      |                   |       |                   |       |                         |       |                   |       |                                      |       |                   |       |
| January              | reference         |       |                   |       | reference               |       |                   |       | reference                            |       | reference         |       |
| February             | 1.04 (0.99 ,1.09) | 0.12  | 1.01 (0.97 ,1.04) | 0.75  | 1.03 (0.97 ,1.09)       | 0.31  | 1.02 (0.99 ,1.05) | 0.23  | 1.03 (0.97 ,1.08)                    | 0.31  | 1.02 (0.99 ,1.05) | 0.20  |
| March                | 0.98 (0.93 ,1.03) | 0.38  | 0.98 (0.94 ,1.01) | 0.17  | 0.96 (0.91 ,1.02)       | 0.21  | 0.99 (0.95 ,1.02) | 0.51  | 0.96 (0.91 ,1.02)                    | 0.20  | 0.99 (0.96 ,1.03) | 0.60  |
| April                | 0.98 (0.93 ,1.03) | 0.50  | 0.95 (0.92 ,0.98) | 0.003 | 0.98 (0.93 ,1.04)       | 0.58  | 0.97 (0.93 ,1)    | 0.07  | 0.98 (0.93 ,1.04)                    | 0.57  | 0.97 (0.94 ,1.01) | 0.10  |
| May                  | 0.98 (0.93 ,1.03) | 0.44  | 0.92 (0.89 ,0.96) | 0.000 | 0.96 (0.9 ,1.02)        | 0.15  | 0.94 (0.91 ,0.97) | 0.001 | 0.96 (0.9 ,1.01)                     | 0.14  | 0.94 (0.91 ,0.98) | 0.001 |
| June                 | 0.99 (0.94 ,1.05) | 0.77  | 0.91 (0.88 ,0.94) | 0.000 | 0.99 (0.93 ,1.05)       | 0.69  | 0.93 (0.9 ,0.97)  | 0.000 | 0.99 (0.93 ,1.05)                    | 0.70  | 0.93 (0.9 ,0.97)  | 0.000 |
| July                 | 0.97 (0.92 ,1.02) | 0.29  | 0.89 (0.86 ,0.92) | 0.000 | 0.95 (0.9 ,1.01)        | 0.10  | 0.91 (0.88 ,0.95) | 0.000 | 0.95 (0.9 ,1.01)                     | 0.10  | 0.91 (0.88 ,0.95) | 0.000 |
| August               | 0.96 (0.91 ,1.01) | 0.11  | 0.92 (0.89 ,0.95) | 0.000 | 0.94 (0.89 ,1)          | 0.04  | 0.94 (0.9 ,0.97)  | 0.000 | 0.94 (0.89 ,1)                       | 0.04  | 0.94 (0.91 ,0.97) | 0.001 |
| September            | 0.99 (0.94 ,1.04) | 0.65  | 0.93 (0.9 ,0.96)  | 0.000 | 0.97 (0.92 ,1.03)       | 0.35  | 0.95 (0.92 ,0.98) | 0.005 | 0.97 (0.92 ,1.03)                    | 0.36  | 0.95 (0.92 ,0.99) | 0.009 |
| October              | 1.01 (0.96 ,1.07) | 0.63  | 0.99 (0.95 ,1.02) | 0.44  | 1.01 (0.95 ,1.07)       | 0.71  | 1.01 (0.98 ,1.05) | 0.56  | 1.01 (0.96 ,1.07)                    | 0.69  | 1.01 (0.98 ,1.05) | 0.47  |
| November             | 1.05 (0.99 ,1.1)  | 0.09  | 1.01 (0.97 ,1.04) | 0.70  | 1.02 (0.97 ,1.08)       | 0.40  | 1.03 (0.99 ,1.06) | 0.15  | 1.03 (0.97 ,1.08)                    | 0.38  | 1.03 (0.99 ,1.07) | 0.12  |
| December             | 1.11 (1.05 ,1.17) | 0.000 | 1.02 (0.99 ,1.06) | 0.20  | 1.15 (1.08 ,1.22)       | 0.000 | 1.09 (1.05 ,1.13) | 0.000 | 1.15 (1.08 ,1.22)                    | 0.000 | 1.09 (1.05 ,1.13) | 0.000 |
| COVID-19 month       |                   |       |                   |       |                         |       |                   |       |                                      |       |                   |       |
| March                | reference         |       |                   |       | reference               |       |                   |       | reference                            |       | reference         |       |
| April                | 1.15 (1.03 ,1.29) | 0.01  | 1.2 (1.11 ,1.3)   | 0.000 | 1.2 (1.06 ,1.35)        | 0.005 | 1.25 (1.15 ,1.35) | 0.000 | 1.19 (1.06 ,1.35)                    | 0.005 | 1.24 (1.15 ,1.35) | 0.000 |
| May                  | 1.02 (0.9 ,1.17)  | 0.73  | 1.1 (1 ,1.21)     | 0.04  | 1.04 (0.89 ,1.2)        | 0.65  | 1.12 (1.01 ,1.23) | 0.03  | 1.04 (0.9 ,1.21)                     | 0.59  | 1.11 (1.01 ,1.23) | 0.03  |
| June                 | 1.02 (0.9 ,1.16)  | 0.70  | 1.11 (1.03 ,1.21) | 0.009 | 1.02 (0.89 ,1.17)       | 0.79  | 1.11 (1.02 ,1.21) | 0.02  | 1.02 (0.89 ,1.18)                    | 0.75  | 1.11 (1.02 ,1.21) | 0.02  |
| July                 | 1.07 (0.95 ,1.2)  | 0.27  | 1.13 (1.04 ,1.22) | 0.004 | 1.03 (0.9 ,1.17)        | 0.66  | 1.16 (1.07 ,1.26) | 0.001 | 1.03 (0.91 ,1.17)                    | 0.64  | 1.15 (1.06 ,1.26) | 0.001 |
| August               | 1.07 (0.94 ,1.21) | 0.33  | 1.16 (1.06 ,1.26) | 0.001 | 1.1 (0.96 ,1.28)        | 0.18  | 1.15 (1.05 ,1.26) | 0.003 | 1.11 (0.96 ,1.28)                    | 0.15  | 1.15 (1.05 ,1.26) | 0.004 |
| September            | 1.05 (0.92 ,1.2)  | 0.49  | 1.15 (1.05 ,1.26) | 0.003 | 1.06 (0.91 ,1.23)       | 0.46  | 1.15 (1.04 ,1.27) | 0.005 | 1.06 (0.91 ,1.24)                    | 0.44  | 1.14 (1.04 ,1.26) | 0.007 |
| October              | 1.02 (0.89 ,1.18) | 0.78  | 1.1 (1 ,1.21)     | 0.04  | 0.97 (0.82 ,1.14)       | 0.70  | 1.13 (1.02 ,1.24) | 0.02  | 0.97 (0.82 ,1.14)                    | 0.71  | 1.12 (1.01 ,1.24) | 0.03  |
| November             | 1.12 (0.98 ,1.29) | 0.10  | 1.04 (0.94 ,1.15) | 0.41  | 1.09 (0.93 ,1.28)       | 0.28  | 1.06 (0.96 ,1.17) | 0.28  | 1.09 (0.94 ,1.28)                    | 0.26  | 1.06 (0.96 ,1.18) | 0.26  |

**eTable 4. 30-day Readmission for STEMI and NSTEMI**

|                                       | Unadjusted        |       |                   |       | Patient Characteristics |       |                   |       | Patient and Hospital Characteristics |       |                   |       |
|---------------------------------------|-------------------|-------|-------------------|-------|-------------------------|-------|-------------------|-------|--------------------------------------|-------|-------------------|-------|
|                                       | STEMI             |       | NSTEMI            |       | STEMI                   |       | NSTEMI            |       | STEMI                                |       | NSTEMI            |       |
|                                       | OR (95% CI)       | P     | OR (95% CI)       | P     | OR (95% CI)             | P     | OR (95% CI)       | P     | OR (95% CI)                          | P     | OR (95% CI)       | P     |
| <b>Race</b>                           |                   |       |                   |       |                         |       |                   |       |                                      |       |                   |       |
| White                                 | reference         |       |                   |       | reference               |       |                   |       | reference                            |       | reference         |       |
| Black                                 | 1.29 (1.24 ,1.34) | 0.000 | 1.15 (1.11 ,1.19) | 0.00  | 1.06 (1.02 ,1.11)       | 0.004 | 0.97 (0.94 ,1.01) | 0.12  | 1.03 (0.99 ,1.07)                    | 0.16  | 0.93 (0.91 ,0.95) | 0.000 |
| Hispanic                              | 1.21 (1.15 ,1.27) | 0.000 | 1.13 (1.07 ,1.19) | 0.000 | 1.05 (0.99 ,1.1)        | 0.086 | 1 (0.96 ,1.05)    | 0.90  | 0.98 (0.93 ,1.03)                    | 0.43  | 0.94 (0.91 ,0.98) | 0.001 |
| <b>Age</b>                            |                   |       |                   |       |                         |       |                   |       |                                      |       |                   |       |
| 65-69                                 | reference         |       |                   |       | reference               |       |                   |       | reference                            |       | reference         |       |
| 70-74                                 | 1.08 (1.05 ,1.11) | 0.000 | 0.97 (0.96 ,0.99) | 0.00  | 1.1 (1.07 ,1.13)        | 0.000 | 1.06 (1.04 ,1.07) | 0.000 | 1.1 (1.06 ,1.13)                     | 0.000 | 1.05 (1.03 ,1.07) | 0.000 |
| 75-79                                 | 1.24 (1.21 ,1.28) | 0.000 | 1.05 (1.04 ,1.07) | 0.000 | 1.22 (1.18 ,1.25)       | 0.000 | 1.12 (1.1 ,1.14)  | 0.000 | 1.22 (1.18 ,1.25)                    | 0.000 | 1.11 (1.09 ,1.13) | 0.000 |
| 80-84                                 | 1.33 (1.29 ,1.38) | 0.000 | 1.06 (1.04 ,1.08) | 0.000 | 1.26 (1.21 ,1.3)        | 0.000 | 1.11 (1.09 ,1.13) | 0.000 | 1.25 (1.21 ,1.29)                    | 0.000 | 1.08 (1.06 ,1.1)  | 0.000 |
| 85-89                                 | 1.33 (1.28 ,1.38) | 0.000 | 1.01 (0.99 ,1.03) | 0.506 | 1.21 (1.16 ,1.26)       | 0.000 | 1.04 (1.02 ,1.06) | 0.000 | 1.19 (1.14 ,1.24)                    | 0.000 | 0.98 (0.96 ,1)    | 0.09  |
| 90-94                                 | 1.23 (1.18 ,1.29) | 0.000 | 0.84 (0.82 ,0.86) | 0.000 | 1.09 (1.04 ,1.15)       | 0.001 | 0.85 (0.83 ,0.88) | 0.000 | 1.06 (1 ,1.11)                       | 0.03  | 0.78 (0.76 ,0.8)  | 0.000 |
| 95-                                   | 0.88 (0.81 ,0.95) | 0.002 | 0.64 (0.61 ,0.67) | 0.000 | 0.76 (0.7 ,0.83)        | 0.000 | 0.65 (0.62 ,0.68) | 0.000 | 0.72 (0.66 ,0.79)                    | 0.000 | 0.57 (0.54 ,0.6)  | 0.000 |
| <b>Hospital Covid-19 burden</b>       |                   |       |                   |       |                         |       |                   |       |                                      |       |                   |       |
| Before Covid-19                       | reference         |       |                   |       | reference               |       |                   |       | reference                            |       | reference         |       |
| 0.0-2.0%                              | 0.98 (0.91 ,1.04) | 0.49  | 0.98 (0.95 ,1.01) | 0.301 | 0.98 (0.91 ,1.05)       | 0.51  | 0.98 (0.95 ,1.01) | 0.19  | 0.97 (0.91 ,1.04)                    | 0.39  | 0.98 (0.95 ,1.01) | 0.16  |
| 2.1-10.0%                             | 1.05 (0.95 ,1.17) | 0.32  | 0.95 (0.9 ,1.01)  | 0.075 | 1.03 (0.93 ,1.15)       | 0.54  | 0.93 (0.88 ,0.98) | 0.01  | 1.03 (0.93 ,1.15)                    | 0.53  | 0.97 (0.92 ,1.03) | 0.30  |
| 10.1-20.0%                            | 1.13 (0.99 ,1.3)  | 0.07  | 1 (0.93 ,1.07)    | 0.962 | 1.12 (0.98 ,1.28)       | 0.10  | 0.97 (0.9 ,1.04)  | 0.34  | 1.09 (0.95 ,1.24)                    | 0.23  | 0.96 (0.9 ,1.03)  | 0.24  |
| 20.1-30.0%                            | 1.14 (0.95 ,1.37) | 0.17  | 1.03 (0.93 ,1.14) | 0.609 | 1.11 (0.93 ,1.34)       | 0.25  | 0.99 (0.89 ,1.1)  | 0.83  | 1.05 (0.87 ,1.26)                    | 0.63  | 0.94 (0.85 ,1.04) | 0.26  |
| 30.1%-                                | 1.01 (0.79 ,1.3)  | 0.92  | 1.19 (1.05 ,1.35) | 0.006 | 1 (0.78 ,1.28)          | 0.98  | 1.13 (1 ,1.28)    | 0.06  | 0.93 (0.72 ,1.2)                     | 0.58  | 1.01 (0.89 ,1.14) | 0.89  |
| <b>Sex</b>                            |                   |       |                   |       |                         |       |                   |       |                                      |       |                   |       |
| Male                                  |                   |       |                   |       | reference               |       |                   |       | reference                            |       | reference         |       |
| Female                                |                   |       |                   |       | 1.06 (1.03 ,1.08)       | 0.000 | 0.98 (0.96 ,0.99) | 0.000 | 1.06 (1.03 ,1.08)                    | 0.000 | 0.96 (0.95 ,0.97) | 0.000 |
| <b>Urgency</b>                        |                   |       |                   |       |                         |       |                   |       |                                      |       |                   |       |
| Urgent                                |                   |       |                   |       | 0.99 (0.96 ,1.03)       | 0.78  | 0.97 (0.93 ,1.02) | 0.20  | 1.01 (0.97 ,1.05)                    | 0.581 | 0.97 (0.93 ,1.01) | 0.10  |
| Emergent                              |                   |       |                   |       | reference               |       |                   |       | reference                            |       | reference         |       |
| <b>Admission source</b>               |                   |       |                   |       |                         |       |                   |       |                                      |       |                   |       |
| Community                             |                   |       |                   |       | reference               |       |                   |       | reference                            |       | reference         |       |
| Hospital                              |                   |       |                   |       | 0.83 (0.8 ,0.87)        | 0.000 | 0.67 (0.64 ,0.7)  | 0.000 | 0.94 (0.9 ,0.98)                     | 0.003 | 0.84 (0.81 ,0.87) | 0.000 |
| SNF/Nursing Home                      |                   |       |                   |       | 0.67 (0.6 ,0.75)        | 0.000 | 0.89 (0.85 ,0.93) | 0.000 | 0.66 (0.59 ,0.75)                    | 0.000 | 0.85 (0.81 ,0.9)  | 0.000 |
| Other                                 |                   |       |                   |       | 0.94 (0.86 ,1.03)       | 0.16  | 0.77 (0.72 ,0.83) | 0.000 | 0.98 (0.9 ,1.07)                     | 0.69  | 0.87 (0.81 ,0.93) | 0.000 |
| Dual-eligible                         |                   |       |                   |       | 1.22 (1.18 ,1.26)       | 0.000 | 1.18 (1.16 ,1.2)  | 0.000 | 1.21 (1.17 ,1.24)                    | 0.000 | 1.14 (1.12 ,1.15) | 0.000 |
| <b>Body Mass Index</b>                |                   |       |                   |       |                         |       |                   |       |                                      |       |                   |       |
| Underweight                           |                   |       |                   |       | 0.9 (0.81 ,1)           | 0.05  | 0.92 (0.88 ,0.96) | 0.000 | 0.91 (0.82 ,1.01)                    | 0.07  | 0.93 (0.89 ,0.97) | 0.001 |
| Morbid obesity                        |                   |       |                   |       | 1 (0.94 ,1.06)          | 0.96  | 1 (0.97 ,1.02)    | 0.87  | 1 (0.94 ,1.07)                       | 0.88  | 1.01 (0.98 ,1.03) | 0.64  |
| <b>Myocardial infarction location</b> |                   |       |                   |       |                         |       |                   |       |                                      |       |                   |       |
| Inferior wall                         |                   |       |                   |       | reference               |       | NA                |       | reference                            |       | NA                |       |
| Anterior wall                         |                   |       |                   |       | 1.16 (1.13 ,1.18)       | 0.000 | NA                |       | 1.15 (1.12 ,1.18)                    | 0.000 | NA                |       |
| Lateral wall                          |                   |       |                   |       | 1.1 (1.06 ,1.15)        | 0.000 | NA                |       | 1.1 (1.05 ,1.15)                     | 0.000 | NA                |       |
| Unspecified                           |                   |       |                   |       | 1.27 (1.23 ,1.32)       | 0.000 | NA                |       | 1.2 (1.16 ,1.24)                     | 0.000 | NA                |       |

|                              | Unadjusted  |   |             |   | Patient Characteristics |       |                  |       | Patient and Hospital Characteristics |       |                  |       |
|------------------------------|-------------|---|-------------|---|-------------------------|-------|------------------|-------|--------------------------------------|-------|------------------|-------|
|                              | STEMI       |   | NSTEMI      |   | STEMI                   |       | NSTEMI           |       | STEMI                                |       | NSTEMI           |       |
|                              | OR (95% CI) | P | OR (95% CI) | P | OR (95% CI)             | P     | OR (95% CI)      | P     | OR (95% CI)                          | P     | OR (95% CI)      | P     |
| Congestive heart failure     |             |   |             |   |                         |       |                  |       |                                      |       |                  |       |
| Systolic                     |             |   |             |   | 1.51 (1.46,1.56)        | 0.000 | 1.25 (1.23,1.28) | 0.000 | 1.54 (1.49,1.59)                     | 0.000 | 1.28 (1.26,1.3)  | 0.000 |
| Diastolic                    |             |   |             |   | 1.35 (1.28,1.41)        | 0.000 | 1.26 (1.24,1.29) | 0.000 | 1.35 (1.29,1.42)                     | 0.000 | 1.28 (1.25,1.3)  | 0.000 |
| Systolic & Diastolic         |             |   |             |   | 1.51 (1.43,1.6)         | 0.000 | 1.25 (1.22,1.28) | 0.000 | 1.53 (1.45,1.61)                     | 0.000 | 1.27 (1.24,1.3)  | 0.000 |
| Unspecified                  |             |   |             |   | 1.27 (1.21,1.33)        | 0.000 | 1.33 (1.3,1.36)  | 0.000 | 1.24 (1.18,1.3)                      | 0.000 | 1.26 (1.24,1.29) | 0.000 |
| Right heart failure          |             |   |             |   | 1.29 (1.05,1.59)        | 0.014 | 0.94 (0.82,1.08) | 0.000 | 1.31 (1.07,1.61)                     | 0.01  | 0.93 (0.81,1.07) | 0.29  |
| Biventricular heart failure  |             |   |             |   | 0.99 (0.79,1.24)        | 0.94  | 0.86 (0.76,0.97) | 0.40  | 1.03 (0.82,1.3)                      | 0.78  | 0.91 (0.8,1.03)  | 0.14  |
| End-stage heart failure      |             |   |             |   | 0.67 (0.45,1)           | 0.048 | 0.65 (0.55,0.77) | 0.02  | 0.67 (0.46,1)                        | 0.05  | 0.66 (0.56,0.79) | 0.000 |
| Complications of AMI         |             |   |             |   |                         |       |                  |       |                                      |       |                  |       |
| Ventricular septal defect    |             |   |             |   | 1.9 (1.6,2.3)           | 0.000 | 1.8 (1.2,2.9)    | 0.01  | 2 (1.7,2.4)                          | 0.000 | 2 (1.3,3.3)      | 0.003 |
| LV rupture                   |             |   |             |   | 0.6 (0.4,0.8)           | 0.004 | 0.6 (0.4,1.1)    | 0.10  | 0.6 (0.4,0.9)                        | 0.005 | 0.7 (0.4,1.2)    | 0.16  |
| Papillary muscle rupture     |             |   |             |   | 1.6 (1.1,2.4)           | 0.01  | 1.3 (0.8,2.2)    | 0.24  | 1.7 (1.2,2.5)                        | 0.007 | 1.4 (0.9,2.4)    | 0.15  |
| Prior procedures             |             |   |             |   |                         |       |                  |       |                                      |       |                  |       |
| PCI                          |             |   |             |   | 1.02 (0.99,1.05)        | 0.20  | 1 (0.98,1.01)    | 0.77  | 1.02 (0.99,1.05)                     | 0.21  | 1.01 (1,1.03)    | 0.03  |
| CABG                         |             |   |             |   | 0.99 (0.95,1.03)        | 0.57  | 0.91 (0.9,0.93)  | 0.00  | 0.99 (0.95,1.03)                     | 0.59  | 0.92 (0.9,0.93)  | 0.000 |
| Heart valve surgery          |             |   |             |   | 1.14 (1.03,1.26)        | 0.01  | 1.12 (1.08,1.15) | 0.00  | 1.15 (1.03,1.27)                     | 0.009 | 1.13 (1.1,1.17)  | 0.000 |
| Dialysis                     |             |   |             |   | 1.64 (1.52,1.78)        | 0.000 | 1.58 (1.54,1.62) | 0.000 | 1.62 (1.5,1.75)                      | 0.000 | 1.58 (1.54,1.62) | 0.000 |
| AICD                         |             |   |             |   | 1.17 (1.06,1.28)        | 0.00  | 0.98 (0.96,1.01) | 0.28  | 1.16 (1.05,1.28)                     | 0.002 | 0.99 (0.96,1.02) | 0.52  |
| COVID                        |             |   |             |   | 0.93 (0.71,1.22)        | 0.58  | 0.97 (0.83,1.13) | 0.69  | 0.94 (0.72,1.24)                     | 0.68  | 0.97 (0.83,1.13) | 0.67  |
| Functional Status            |             |   |             |   |                         |       |                  |       |                                      |       |                  |       |
| Wheel-chair                  |             |   |             |   | 0.92 (0.76,1.1)         | 0.36  | 0.91 (0.85,0.97) | 0.005 | 0.92 (0.77,1.11)                     | 0.39  | 0.92 (0.85,0.98) | 0.02  |
| Supplemental oxygen          |             |   |             |   | 1.07 (0.99,1.15)        | 0.08  | 1.13 (1.1,1.16)  | 0.000 | 1.06 (0.98,1.14)                     | 0.12  | 1.12 (1.09,1.15) | 0.000 |
| Dependent on provider        |             |   |             |   | 0.83 (0.69,1.01)        | 0.06  | 0.89 (0.83,0.96) | 0.003 | 0.8 (0.66,0.97)                      | 0.02  | 0.86 (0.8,0.93)  | 0.000 |
| Elixhauser comorbidities     |             |   |             |   |                         |       |                  |       |                                      |       |                  |       |
| Cardiac arrhythmias          |             |   |             |   | 1.09 (1.07,1.12)        | 0.000 | 1.05 (1.04,1.06) | 0.000 | 1.1 (1.07,1.12)                      | 0.000 | 1.06 (1.05,1.07) | 0.000 |
| Valvular heart disease       |             |   |             |   | 1.18 (1.15,1.22)        | 0.000 | 1.17 (1.15,1.19) | 0.000 | 1.2 (1.17,1.24)                      | 0.000 | 1.21 (1.2,1.23)  | 0.000 |
| Pulmonary circulation        |             |   |             |   | 1.09 (1.04,1.15)        | 0.000 | 1.04 (1.02,1.06) | 0.000 | 1.1 (1.04,1.15)                      | 0.000 | 1.04 (1.02,1.06) | 0.000 |
| Peripheral vascular disorder |             |   |             |   | 1.16 (1.12,1.2)         | 0.000 | 1.12 (1.1,1.14)  | 0.000 | 1.17 (1.13,1.21)                     | 0.000 | 1.15 (1.13,1.17) | 0.000 |
| Hypertension, uncomplicated  |             |   |             |   | 1.08 (1.05,1.11)        | 0.000 | 0.98 (0.96,1)    | 0.040 | 1.08 (1.05,1.12)                     | 0.000 | 1.01 (0.99,1.02) | 0.41  |
| Hypertension, complicated    |             |   |             |   | 1.14 (1.1,1.18)         | 0.000 | 1.02 (1,1.04)    | 0.032 | 1.15 (1.11,1.19)                     | 0.000 | 1.06 (1.04,1.08) | 0.000 |
| Paralysis                    |             |   |             |   | 1.56 (1.37,1.78)        | 0.000 | 1.35 (1.26,1.45) | 0.000 | 1.56 (1.37,1.78)                     | 0.000 | 1.38 (1.28,1.48) | 0.000 |
| Neurologic disorder, other   |             |   |             |   | 0.87 (0.83,0.91)        | 0.000 | 0.93 (0.91,0.95) | 0.000 | 0.87 (0.83,0.9)                      | 0.000 | 0.92 (0.9,0.94)  | 0.000 |
| Chronic pulmonary disease    |             |   |             |   | 1.18 (1.15,1.22)        | 0.000 | 1.16 (1.14,1.17) | 0.000 | 1.18 (1.15,1.21)                     | 0.000 | 1.15 (1.13,1.16) | 0.000 |
| Diabetes, uncomplicated      |             |   |             |   | 1.14 (1.11,1.17)        | 0.000 | 1.17 (1.16,1.19) | 0.000 | 1.13 (1.1,1.17)                      | 0.000 | 1.16 (1.15,1.18) | 0.000 |

|                                         | STEMI       |   | NSTEMI      |   | STEMI             |       | NSTEMI            |       | STEMI             |       | NSTEMI            |       |
|-----------------------------------------|-------------|---|-------------|---|-------------------|-------|-------------------|-------|-------------------|-------|-------------------|-------|
|                                         | OR (95% CI) | P | OR (95% CI) | P | OR (95% CI)       | P     | OR (95% CI)       | P     | OR (95% CI)       | P     | OR (95% CI)       | P     |
| Diabetes, complicated                   |             |   |             |   | 1.29 (1.25 ,1.32) | 0.000 | 1.23 (1.22 ,1.25) | 0.000 | 1.3 (1.26 ,1.34)  | 0.000 | 1.26 (1.24 ,1.27) | 0.000 |
| Hypothyroidism                          |             |   |             |   | 1.01 (0.98 ,1.04) | 0.69  | 0.99 (0.97 ,1)    | 0.06  | 1.01 (0.98 ,1.04) | 0.52  | 0.99 (0.98 ,1.01) | 0.37  |
| Renal failure                           |             |   |             |   | 1.12 (1.08 ,1.16) | 0.000 | 1.11 (1.09 ,1.13) | 0.000 | 1.12 (1.08 ,1.16) | 0.000 | 1.11 (1.09 ,1.13) | 0.000 |
| Liver disease                           |             |   |             |   | 0.89 (0.84 ,0.94) | 0.000 | 0.97 (0.94 ,1)    | 0.09  | 0.89 (0.84 ,0.95) | 0.000 | 0.98 (0.95 ,1.01) | 0.270 |
| Peptic ulcer disease                    |             |   |             |   | 1.11 (0.96 ,1.28) | 0.16  | 1.16 (1.09 ,1.22) | 0.000 | 1.1 (0.96 ,1.27)  | 0.17  | 1.18 (1.11 ,1.24) | 0.000 |
| AIDS/HIV                                |             |   |             |   | 1.19 (0.85 ,1.67) | 0.30  | 1.09 (0.92 ,1.3)  | 0.32  | 1.19 (0.85 ,1.67) | 0.30  | 1.11 (0.93 ,1.32) | 0.25  |
| Lymphoma                                |             |   |             |   | 1.1 (0.95 ,1.27)  | 0.18  | 1.21 (1.15 ,1.28) | 0.000 | 1.12 (0.97 ,1.3)  | 0.11  | 1.23 (1.17 ,1.3)  | 0.000 |
| Metastatic cancer                       |             |   |             |   | 1.13 (1.02 ,1.25) | 0.02  | 1.03 (0.98 ,1.08) | 0.21  | 1.14 (1.03 ,1.26) | 0.01  | 1.02 (0.97 ,1.07) | 0.35  |
| Solid tumor                             |             |   |             |   | 1.19 (1.11 ,1.27) | 0.000 | 1.13 (1.09 ,1.16) | 0.000 | 1.18 (1.11 ,1.26) | 0.000 | 1.13 (1.1 ,1.16)  | 0.000 |
| Rheumatoid arthritis                    |             |   |             |   | 1.09 (1.03 ,1.16) | 0.004 | 1.06 (1.04 ,1.09) | 0.00  | 1.1 (1.04 ,1.17)  | 0.001 | 1.08 (1.06 ,1.11) | 0.00  |
| Coagulopathy                            |             |   |             |   | 1.08 (1.03 ,1.14) | 0.003 | 1.02 (0.99 ,1.04) | 0.21  | 1.09 (1.03 ,1.14) | 0.002 | 1.03 (1.01 ,1.06) | 0.008 |
| Weight loss                             |             |   |             |   | 1.13 (1.06 ,1.21) | 0.000 | 1 (0.97 ,1.03)    | 0.89  | 1.12 (1.05 ,1.2)  | 0.001 | 0.97 (0.94 ,1.01) | 0.12  |
| Fluid and electrolyte disorder          |             |   |             |   | 1.03 (1.01 ,1.06) | 0.02  | 1.07 (1.05 ,1.08) | 0.000 | 1.02 (0.99 ,1.05) | 0.15  | 1.05 (1.04 ,1.06) | 0.000 |
| Anemia, blood loss                      |             |   |             |   | 1.55 (1.37 ,1.76) | 0.000 | 1.23 (1.17 ,1.3)  | 0.000 | 1.53 (1.35 ,1.75) | 0.000 | 1.22 (1.16 ,1.29) | 0.00  |
| Anemia, deficiency                      |             |   |             |   | 1.28 (1.21 ,1.36) | 0.000 | 1.13 (1.1 ,1.16)  | 0.000 | 1.29 (1.21 ,1.37) | 0.000 | 1.14 (1.11 ,1.17) | 0.000 |
| Alcohol abuse                           |             |   |             |   | 1.09 (1.01 ,1.17) | 0.03  | 1.06 (1.02 ,1.1)  | 0.001 | 1.09 (1.01 ,1.18) | 0.02  | 1.05 (1.01 ,1.09) | 0.008 |
| Drug abuse                              |             |   |             |   | 1.22 (1.11 ,1.34) | 0.000 | 1.1 (1.05 ,1.15)  | 0.000 | 1.2 (1.1 ,1.32)   | 0.000 | 1.09 (1.04 ,1.14) | 0.000 |
| Psychoses                               |             |   |             |   | 1.34 (1.15 ,1.57) | 0.000 | 1.23 (1.16 ,1.31) | 0.00  | 1.32 (1.13 ,1.54) | 0.001 | 1.18 (1.11 ,1.25) | 0.00  |
| Depression                              |             |   |             |   | 1.08 (1.04 ,1.12) | 0.000 | 1.01 (0.99 ,1.03) | 0.22  | 1.09 (1.05 ,1.13) | 0.000 | 1.02 (1.01 ,1.04) | 0.009 |
| Volume of AMI hospitalizations          |             |   |             |   |                   |       |                   |       |                   |       |                   |       |
| <200                                    |             |   |             |   |                   |       |                   |       | reference         |       | reference         |       |
| 200-499                                 |             |   |             |   |                   |       |                   |       | 0.78 (0.73 ,0.83) | 0.000 | 0.59 (0.56 ,0.63) | 0.000 |
| 500-999                                 |             |   |             |   |                   |       |                   |       | 0.65 (0.61 ,0.69) | 0.000 | 0.43 (0.41 ,0.46) | 0.000 |
| 1000-1999                               |             |   |             |   |                   |       |                   |       | 0.57 (0.53 ,0.61) | 0.000 | 0.35 (0.33 ,0.37) | 0.000 |
| 2000-                                   |             |   |             |   |                   |       |                   |       | 0.53 (0.49 ,0.58) | 0.000 | 0.31 (0.29 ,0.34) | 0.000 |
| Proportion of minority patients (AMI)   |             |   |             |   |                   |       |                   |       |                   |       |                   |       |
| <5%                                     |             |   |             |   |                   |       |                   |       | reference         |       | reference         |       |
| 5.0-9.9%                                |             |   |             |   |                   |       |                   |       | 1.1 (1.04 ,1.16)  | 0.000 | 1.04 (0.98 ,1.1)  | 0.17  |
| 10.0-24.9                               |             |   |             |   |                   |       |                   |       | 1.05 (1 ,1.1)     | 0.05  | 1 (0.95 ,1.06)    | 0.88  |
| 25.0-49.9%                              |             |   |             |   |                   |       |                   |       | 1.05 (1 ,1.11)    | 0.07  | 1.02 (0.96 ,1.07) | 0.59  |
| 50.0%-                                  |             |   |             |   |                   |       |                   |       | 1.11 (1.01 ,1.21) | 0.03  | 1.09 (1 ,1.19)    | 0.06  |
| Disproportionate share percentage (DSH) |             |   |             |   |                   |       |                   |       |                   |       |                   |       |
| 0-9.9%                                  |             |   |             |   |                   |       |                   |       | reference         |       | reference         |       |
| 10.0-24.9%                              |             |   |             |   |                   |       |                   |       | 1.09 (1.01 ,1.17) | 0.03  | 1 (0.91 ,1.09)    | 0.93  |
| 25.0-49.9%                              |             |   |             |   |                   |       |                   |       | 1.06 (0.98 ,1.14) | 0.12  | 0.96 (0.88 ,1.05) | 0.39  |
| 50.0%-                                  |             |   |             |   |                   |       |                   |       | 1.18 (1.07 ,1.3)  | 0.00  | 0.97 (0.87 ,1.08) | 0.56  |
| Resident-to-bed ratio                   |             |   |             |   |                   |       |                   |       |                   |       |                   |       |
| 0                                       |             |   |             |   |                   |       |                   |       | reference         |       | reference         |       |
| >0-0.10                                 |             |   |             |   |                   |       |                   |       | 0.89 (0.85 ,0.93) | 0.000 | 0.93 (0.89 ,0.98) | 0.002 |
| 0.11-0.20                               |             |   |             |   |                   |       |                   |       | 0.9 (0.85 ,0.95)  | 0.000 | 0.94 (0.89 ,1)    | 0.05  |
| 0.21-0.40                               |             |   |             |   |                   |       |                   |       | 0.9 (0.85 ,0.95)  | 0.000 | 0.98 (0.91 ,1.05) | 0.56  |
| 0.41-                                   |             |   |             |   |                   |       |                   |       | 0.84 (0.79 ,0.89) | 0.000 | 0.91 (0.85 ,0.97) | 0.004 |

|                      | Unadjusted       |       |                  |       | Patient Characteristics |       |                  |       | Patient and Hospital Characteristics |       |                  |       |
|----------------------|------------------|-------|------------------|-------|-------------------------|-------|------------------|-------|--------------------------------------|-------|------------------|-------|
|                      | STEMI            |       | NSTEMI           |       | STEMI                   |       | NSTEMI           |       | STEMI                                |       | NSTEMI           |       |
|                      | OR (95% CI)      | P     | OR (95% CI)      | P     | OR (95% CI)             | P     | OR (95% CI)      | P     | OR (95% CI)                          | P     | OR (95% CI)      | P     |
| Rurality             |                  |       |                  |       |                         |       |                  |       |                                      |       |                  |       |
| Rural hospital       |                  |       |                  |       |                         |       |                  |       | reference                            |       | reference        |       |
| Large urban hospital |                  |       |                  |       |                         |       |                  |       | 0.93 (0.87,1)                        | 0.048 | 0.96 (0.9,1.03)  | 0.28  |
| Other urban hospital |                  |       |                  |       |                         |       |                  |       | 0.84 (0.79,0.9)                      | 0.000 | 0.83 (0.78,0.89) | 0.000 |
| Time                 | 1 (1,1)          | 0.019 | 1 (1,1)          | 0.000 | 1 (1,1)                 | 0.000 | 1 (1,1)          | 0.000 | 1 (1,1)                              | 0.002 | 1 (1,1)          | 0.12  |
| Admission month      |                  |       |                  |       |                         |       |                  |       |                                      |       |                  |       |
| January              | reference        |       |                  |       | reference               |       |                  |       | reference                            |       | reference        |       |
| February             | 0.98 (0.93,1.03) | 0.40  | 0.98 (0.96,1)    | 0.11  | 0.98 (0.93,1.02)        | 0.32  | 0.99 (0.97,1.01) | 0.22  | 0.98 (0.93,1.02)                     | 0.33  | 0.99 (0.97,1.01) | 0.35  |
| March                | 0.98 (0.93,1.03) | 0.36  | 0.98 (0.96,1)    | 0.08  | 0.98 (0.93,1.03)        | 0.36  | 0.98 (0.96,1.01) | 0.18  | 0.97 (0.93,1.03)                     | 0.31  | 0.99 (0.97,1.01) | 0.43  |
| April                | 0.95 (0.9,1)     | 0.07  | 0.97 (0.94,0.99) | 0.004 | 0.95 (0.9,1)            | 0.06  | 0.97 (0.95,1)    | 0.04  | 0.95 (0.9,1)                         | 0.05  | 0.98 (0.96,1.01) | 0.12  |
| May                  | 0.97 (0.92,1.02) | 0.18  | 0.97 (0.95,0.99) | 0.013 | 0.96 (0.91,1.01)        | 0.12  | 0.98 (0.96,1.01) | 0.128 | 0.96 (0.91,1.01)                     | 0.13  | 0.99 (0.97,1.01) | 0.40  |
| June                 | 0.95 (0.91,1)    | 0.07  | 0.97 (0.94,0.99) | 0.005 | 0.96 (0.91,1.01)        | 0.12  | 0.98 (0.96,1.01) | 0.142 | 0.96 (0.91,1.01)                     | 0.11  | 0.99 (0.97,1.02) | 0.54  |
| July                 | 1 (0.95,1.06)    | 0.88  | 0.94 (0.92,0.97) | 0.000 | 1.01 (0.96,1.06)        | 0.77  | 0.96 (0.94,0.99) | 0.003 | 1.01 (0.95,1.06)                     | 0.84  | 0.97 (0.95,1)    | 0.02  |
| August               | 0.99 (0.94,1.04) | 0.76  | 0.94 (0.92,0.97) | 0.000 | 0.99 (0.94,1.04)        | 0.70  | 0.96 (0.94,0.98) | 0.001 | 0.99 (0.94,1.04)                     | 0.71  | 0.97 (0.94,0.99) | 0.006 |
| September            | 0.98 (0.94,1.04) | 0.56  | 0.95 (0.93,0.98) | 0.000 | 0.98 (0.93,1.03)        | 0.50  | 0.97 (0.95,0.99) | 0.007 | 0.98 (0.93,1.03)                     | 0.46  | 0.97 (0.95,1)    | 0.03  |
| October              | 0.96 (0.92,1.01) | 0.14  | 0.96 (0.94,0.98) | 0.00  | 0.96 (0.91,1.01)        | 0.116 | 0.97 (0.95,1)    | 0.02  | 0.96 (0.91,1.01)                     | 0.11  | 0.97 (0.95,1)    | 0.03  |
| November             | 0.93 (0.88,0.98) | 0.01  | 0.94 (0.92,0.96) | 0.00  | 0.92 (0.87,0.97)        | 0.00  | 0.95 (0.93,0.97) | 0.00  | 0.92 (0.87,0.97)                     | 0.001 | 0.95 (0.93,0.97) | 0.000 |
| December             | 0.74 (0.7,0.79)  | 0.000 | 0.78 (0.76,0.8)  | 0.00  | 0.75 (0.71,0.79)        | 0.000 | 0.79 (0.77,0.81) | 0.000 | 0.74 (0.7,0.79)                      | 0.000 | 0.78 (0.76,0.8)  | 0.000 |
| COVID-19 month       |                  |       |                  |       |                         |       |                  |       |                                      |       |                  |       |
| March                | reference        |       |                  |       | reference               |       |                  |       | reference                            |       | reference        |       |
| April                | 0.83 (0.73,0.94) | 0.00  | 0.8 (0.76,0.85)  | 0.000 | 0.83 (0.73,0.94)        | 0.003 | 0.81 (0.76,0.85) | 0.000 | 0.83 (0.74,0.94)                     | 0.004 | 0.79 (0.75,0.84) | 0.000 |
| May                  | 0.95 (0.83,1.09) | 0.49  | 0.95 (0.88,1.01) | 0.123 | 0.96 (0.83,1.11)        | 0.57  | 0.97 (0.9,1.04)  | 0.37  | 0.97 (0.85,1.12)                     | 0.70  | 0.95 (0.89,1.02) | 0.16  |
| June                 | 0.99 (0.88,1.11) | 0.86  | 1.01 (0.95,1.07) | 0.819 | 0.99 (0.88,1.12)        | 0.88  | 1.02 (0.96,1.09) | 0.55  | 0.99 (0.88,1.12)                     | 0.93  | 1 (0.94,1.06)    | 0.97  |
| July                 | 1.03 (0.92,1.16) | 0.59  | 0.99 (0.93,1.05) | 0.743 | 1.03 (0.91,1.16)        | 0.68  | 1 (0.95,1.06)    | 0.907 | 1.03 (0.91,1.16)                     | 0.61  | 0.97 (0.92,1.03) | 0.37  |
| August               | 0.94 (0.82,1.07) | 0.32  | 1.01 (0.94,1.08) | 0.74  | 0.94 (0.82,1.07)        | 0.35  | 1.02 (0.95,1.1)  | 0.533 | 0.95 (0.83,1.09)                     | 0.47  | 1 (0.94,1.07)    | 0.97  |
| September            | 0.81 (0.71,0.93) | 0.00  | 1.03 (0.96,1.1)  | 0.381 | 0.81 (0.71,0.93)        | 0.00  | 1.05 (0.98,1.12) | 0.176 | 0.81 (0.71,0.93)                     | 0.003 | 1.02 (0.96,1.09) | 0.52  |
| October              | 1.03 (0.89,1.18) | 0.70  | 1.07 (1,1.15)    | 0.06  | 1.03 (0.89,1.19)        | 0.70  | 1.09 (1.01,1.16) | 0.02  | 1.04 (0.9,1.2)                       | 0.60  | 1.06 (0.99,1.14) | 0.10  |
| November             | 0.92 (0.79,1.06) | 0.24  | 0.97 (0.9,1.04)  | 0.378 | 0.91 (0.79,1.06)        | 0.22  | 0.99 (0.92,1.07) | 0.80  | 0.92 (0.8,1.07)                      | 0.29  | 0.97 (0.9,1.04)  | 0.34  |

**eTable 5. Non-home Discharges for STEMI and NSTEMI**

|                                       | Unadjusted         |       |                  |       | Patient Characteristics |       |                  |       | Patient and Hospital Characteristics |       |                  |       |
|---------------------------------------|--------------------|-------|------------------|-------|-------------------------|-------|------------------|-------|--------------------------------------|-------|------------------|-------|
|                                       | STEMI              |       | NSTEMI           |       | STEMI                   |       | NSTEMI           |       | STEMI                                |       | NSTEMI           |       |
|                                       | OR (95% CI)        | P     | OR (95% CI)      | P     | OR (95% CI)             | P     | OR (95% CI)      | P     | OR (95% CI)                          | P     | OR (95% CI)      | P     |
| <b>Race</b>                           |                    |       |                  |       |                         |       |                  |       |                                      |       |                  |       |
| White                                 | reference          |       |                  |       | reference               |       |                  |       | reference                            |       | reference        |       |
| Black                                 | 1.43 (1.38,1.49)   | 0.000 | 1.13 (1.1,1.16)  | 0.000 | 0.95 (0.91,1)           | 0.034 | 0.78 (0.76,0.8)  | 0.000 | 0.93 (0.89,0.97)                     | 0.001 | 0.77 (0.75,0.8)  | 0.000 |
| Hispanic                              | 1.09 (1.04,1.15)   | 0.000 | 0.82 (0.76,0.87) | 0.000 | 0.86 (0.81,0.9)         | 0.000 | 0.65 (0.62,0.68) | 0.000 | 0.84 (0.8,0.88)                      | 0.000 | 0.65 (0.63,0.67) | 0.000 |
| <b>Age</b>                            |                    |       |                  |       |                         |       |                  |       |                                      |       |                  |       |
| 65-69                                 | reference          |       |                  |       | reference               |       |                  |       | reference                            |       | reference        |       |
| 70-74                                 | 1.21 (1.18,1.25)   | 0.000 | 1.1 (1.08,1.12)  | 0.000 | 1.33 (1.29,1.38)        | 0.000 | 1.31 (1.29,1.34) | 0.000 | 1.33 (1.29,1.38)                     | 0.000 | 1.32 (1.29,1.34) | 0.000 |
| 75-79                                 | 1.73 (1.68,1.78)   | 0.000 | 1.49 (1.46,1.52) | 0.000 | 1.89 (1.83,1.95)        | 0.000 | 1.76 (1.73,1.8)  | 0.000 | 1.89 (1.83,1.95)                     | 0.000 | 1.77 (1.74,1.8)  | 0.000 |
| 80-84                                 | 2.62 (2.55,2.7)    | 0.000 | 2.08 (2.04,2.12) | 0.000 | 2.83 (2.74,2.93)        | 0.000 | 2.44 (2.39,2.49) | 0.000 | 2.84 (2.75,2.93)                     | 0.000 | 2.45 (2.4,2.51)  | 0.000 |
| 85-89                                 | 4.24 (4.11,4.38)   | 0.000 | 3.01 (2.94,3.07) | 0.000 | 4.47 (4.3,4.64)         | 0.000 | 3.4 (3.33,3.48)  | 0.000 | 4.49 (4.32,4.66)                     | 0.000 | 3.45 (3.37,3.53) | 0.000 |
| 90-94                                 | 6.75 (6.49,7.02)   | 0.000 | 4.38 (4.28,4.5)  | 0.000 | 7.03 (6.71,7.37)        | 0.000 | 4.84 (4.7,4.98)  | 0.000 | 7.1 (6.78,7.45)                      | 0.000 | 4.93 (4.79,5.07) | 0.000 |
| 95-                                   | 10.61 (9.98,11.28) | 0.000 | 6.89 (6.67,7.12) | 0.000 | 10.95 (10.2,11.76)      | 0.000 | 7.32 (7.05,7.6)  | 0.000 | 11.13 (10.36,11.95)                  | 0.000 | 7.51 (7.23,7.8)  | 0.000 |
| <b>Hospital Covid-19 burden</b>       |                    |       |                  |       |                         |       |                  |       |                                      |       |                  |       |
| Before Covid-19                       | reference          |       |                  |       | reference               |       |                  |       | reference                            |       | reference        |       |
| 0.0-2.0%                              | 1 (0.95,1.06)      | 0.89  | 1.01 (0.98,1.04) | 0.50  | 0.98 (0.92,1.05)        | 0.64  | 1 (0.97,1.04)    | 0.892 | 0.99 (0.92,1.05)                     | 0.65  | 1 (0.97,1.04)    | 0.822 |
| 2.1-10.0%                             | 1 (0.91,1.1)       | 0.99  | 1.05 (0.99,1.11) | 0.08  | 0.94 (0.84,1.05)        | 0.28  | 1.01 (0.95,1.07) | 0.80  | 0.92 (0.82,1.03)                     | 0.14  | 0.98 (0.92,1.04) | 0.492 |
| 10.1-20.0%                            | 1.04 (0.93,1.17)   | 0.48  | 1.1 (1.03,1.18)  | 0.006 | 1.01 (0.88,1.16)        | 0.85  | 1.05 (0.97,1.13) | 0.21  | 0.99 (0.86,1.14)                     | 0.92  | 1.03 (0.95,1.11) | 0.48  |
| 20.1-30.0%                            | 0.88 (0.73,1.05)   | 0.15  | 1.1 (0.99,1.22)  | 0.08  | 0.75 (0.61,0.92)        | 0.01  | 1.03 (0.92,1.15) | 0.64  | 0.74 (0.6,0.91)                      | 0.00  | 1.02 (0.91,1.14) | 0.79  |
| 30.1%-                                | 1.04 (0.84,1.3)    | 0.70  | 1.37 (1.2,1.57)  | 0.000 | 0.98 (0.77,1.25)        | 0.86  | 1.32 (1.15,1.52) | 0.000 | 0.96 (0.76,1.23)                     | 0.77  | 1.33 (1.16,1.53) | 0.000 |
| <b>Sex</b>                            |                    |       |                  |       |                         |       |                  |       |                                      |       |                  |       |
| Male                                  |                    |       |                  |       | reference               |       |                  |       | reference                            |       | reference        |       |
| Female                                |                    |       |                  |       | 1.31 (1.28,1.34)        | 0.000 | 1.08 (1.06,1.09) | 0.000 | 1.32 (1.29,1.34)                     | 0.000 | 1.08 (1.06,1.09) | 0.000 |
| <b>Urgency</b>                        |                    |       |                  |       |                         |       |                  |       |                                      |       |                  |       |
| Urgent                                |                    |       |                  |       | 0.96 (0.92,1.01)        | 0.088 | 0.92 (0.88,0.95) | 0.000 | 0.96 (0.92,1.01)                     | 0.09  | 0.92 (0.88,0.95) | 0.000 |
| Emergent                              |                    |       |                  |       | reference               |       |                  |       | reference                            |       | reference        |       |
| <b>Admission source</b>               |                    |       |                  |       |                         |       |                  |       |                                      |       |                  |       |
| Community                             |                    |       |                  |       | reference               |       |                  |       | reference                            |       | reference        |       |
| Hospital                              |                    |       |                  |       | 1.18 (1.13,1.24)        | 0     | 1.31 (1.26,1.37) | 0.000 | 1.16 (1.11,1.22)                     | 0.000 | 1.29 (1.24,1.34) | 0.000 |
| SNF/Nursing Home                      |                    |       |                  |       | 5.07 (4.43,5.81)        | 0.000 | 4.95 (4.65,5.26) | 0.000 | 5.1 (4.44,5.87)                      | 0.000 | 5.01 (4.71,5.33) | 0.000 |
| Other                                 |                    |       |                  |       | 1.25 (1.14,1.38)        | 0.00  | 1.47 (1.37,1.57) | 0.000 | 1.24 (1.13,1.36)                     | 0.000 | 1.45 (1.36,1.55) | 0.000 |
| Dual-eligible                         |                    |       |                  |       | 1.54 (1.49,1.58)        | 0.000 | 1.64 (1.61,1.67) | 0.000 | 1.53 (1.49,1.58)                     | 0.000 | 1.65 (1.62,1.69) | 0.000 |
| <b>Body Mass Index</b>                |                    |       |                  |       |                         |       |                  |       |                                      |       |                  |       |
| Underweight                           |                    |       |                  |       | 0.95 (0.86,1.06)        | 0.38  | 1.1 (1.05,1.15)  | 0.000 | 0.95 (0.86,1.06)                     | 0.36  | 1.1 (1.06,1.15)  | 0.000 |
| Morbid obesity                        |                    |       |                  |       | 1.51 (1.43,1.6)         | 0.000 | 1.42 (1.38,1.47) | 0     | 1.52 (1.43,1.61)                     | 0.000 | 1.43 (1.39,1.47) | 0.00  |
| <b>Myocardial infarction location</b> |                    |       |                  |       |                         |       |                  |       |                                      |       |                  |       |
| Inferior wall                         |                    |       |                  |       | reference               |       | NA               |       | reference                            |       | NA               |       |
| Anterior wall                         |                    |       |                  |       | 1.2 (1.18,1.23)         | 0.000 | NA               |       | 1.21 (1.18,1.24)                     | 0.000 | NA               |       |
| Lateral wall                          |                    |       |                  |       | 1.23 (1.18,1.28)        | 0.000 | NA               |       | 1.23 (1.19,1.28)                     | 0.000 | NA               |       |
| Unspecified                           |                    |       |                  |       | 1.62 (1.57,1.67)        | 0.000 | NA               |       | 1.63 (1.58,1.69)                     | 0.000 | NA               |       |

|                              | Unadjusted  |   |             |   | Patient Characteristics |       |                   |       | Patient and Hospital Characteristics |       |                    |       |
|------------------------------|-------------|---|-------------|---|-------------------------|-------|-------------------|-------|--------------------------------------|-------|--------------------|-------|
|                              | STEMI       |   | NSTEMI      |   | STEMI                   |       | NSTEMI            |       | STEMI                                |       | NSTEMI             |       |
|                              | OR (95% CI) | P | OR (95% CI) | P | OR (95% CI)             | P     | OR (95% CI)       | P     | OR (95% CI)                          | P     | OR (95% CI)        | P     |
| Congestive heart failure     |             |   |             |   |                         |       |                   |       |                                      |       |                    |       |
| Systolic                     |             |   |             |   | 1.93 (1.86 ,1.99)       | 0.000 | 2.13 (2.09 ,2.17) | 0.000 | 1.92 (1.86 ,1.99)                    | 0.000 | 2.13 (2.09 ,2.17)  | 0.000 |
| Diastolic                    |             |   |             |   | 1.42 (1.35 ,1.49)       | 0.000 | 1.61 (1.58 ,1.65) | 0.000 | 1.42 (1.35 ,1.49)                    | 0.000 | 1.62 (1.59 ,1.65)  | 0.000 |
| Systolic & Diastolic         |             |   |             |   | 1.91 (1.8 ,2.02)        | 0.000 | 2.13 (2.08 ,2.18) | 0.000 | 1.91 (1.8 ,2.02)                     | 0.000 | 2.13 (2.08 ,2.18)  | 0.000 |
| Unspecified                  |             |   |             |   | 2.26 (2.16 ,2.37)       | 0.000 | 1.82 (1.78 ,1.87) | 0.000 | 2.27 (2.17 ,2.38)                    | 0.000 | 1.84 (1.79 ,1.89)  | 0.000 |
| Right heart failure          |             |   |             |   | 3.92 (3.17 ,4.86)       | 0.000 | 2.7 (2.34 ,3.12)  | 0.000 | 3.91 (3.16 ,4.84)                    | 0.000 | 2.73 (2.36 ,3.15)  | 0.000 |
| Biventricular heart failure  |             |   |             |   | 3.69 (2.96 ,4.61)       | 0.000 | 1.82 (1.59 ,2.08) | 0.000 | 3.65 (2.93 ,4.56)                    | 0.000 | 1.82 (1.6 ,2.08)   | 0.000 |
| End-stage heart failure      |             |   |             |   | 2.88 (1.93 ,4.31)       | 0.000 | 2.91 (2.5 ,3.4)   | 0.000 | 2.88 (1.93 ,4.31)                    | 0.000 | 2.91 (2.49 ,3.4)   | 0.000 |
| Complications of AMI         |             |   |             |   |                         |       |                   |       |                                      |       |                    |       |
| Ventricular septal defect    |             |   |             |   | 7.91 (6.37 ,9.82)       | 0.000 | 4.62 (2.75 ,7.76) | 0.000 | 7.82 (6.3 ,9.71)                     | 0.000 | 4.52 (2.71 ,7.55)  | 0.000 |
| LV rupture                   |             |   |             |   | 38.1 (25.8 ,56.4)       | 0.000 | 25.2 (13.5 ,47)   | 0.000 | 38.4 (26 ,56.9)                      | 0.000 | 25.2 (13.5 ,47)    | 0.000 |
| Papillary muscle rupture     |             |   |             |   | 9.44 (6.06 ,14.7)       | 0.000 | 9.86 (5.6 ,17.37) | 0.000 | 9.31 (5.96 ,14.53)                   | 0.000 | 9.92 (5.65 ,17.41) | 0.000 |
| Prior procedures             |             |   |             |   |                         |       |                   |       |                                      |       |                    |       |
| PCI                          |             |   |             |   | 0.8 (0.77 ,0.82)        | 0.000 | 0.66 (0.65 ,0.67) | 0.000 | 0.8 (0.77 ,0.82)                     | 0.000 | 0.66 (0.65 ,0.67)  | 0.000 |
| CABG                         |             |   |             |   | 0.92 (0.89 ,0.96)       | 0.000 | 0.73 (0.72 ,0.75) | 0.00  | 0.92 (0.89 ,0.96)                    | 0.000 | 0.73 (0.72 ,0.75)  | 0.000 |
| Heart valve surgery          |             |   |             |   | 1.05 (0.95 ,1.15)       | 0.325 | 0.85 (0.82 ,0.89) | 0.00  | 1.05 (0.95 ,1.15)                    | 0.34  | 0.85 (0.82 ,0.88)  | 0.000 |
| Dialysis                     |             |   |             |   | 2.23 (2.05 ,2.43)       | 0.000 | 1.77 (1.71 ,1.83) | 0.000 | 2.24 (2.06 ,2.44)                    | 0.000 | 1.77 (1.71 ,1.83)  | 0.000 |
| AICD                         |             |   |             |   | 0.74 (0.67 ,0.82)       | 0.00  | 0.66 (0.63 ,0.68) | 0.000 | 0.74 (0.67 ,0.82)                    | 0.000 | 0.66 (0.63 ,0.68)  | 0.000 |
| COVID                        |             |   |             |   | 2.77 (2.19 ,3.51)       | 0.000 | 2.33 (2 ,2.71)    | 0.000 | 2.78 (2.19 ,3.52)                    | 0.000 | 2.34 (2.01 ,2.73)  | 0.000 |
| Functional Status            |             |   |             |   |                         |       |                   |       |                                      |       |                    |       |
| Wheel-chair                  |             |   |             |   | 1.73 (1.45 ,2.07)       | 0     | 1.73 (1.61 ,1.85) | 0.000 | 1.73 (1.45 ,2.07)                    | 0.000 | 1.72 (1.6 ,1.84)   | 0.000 |
| Supplemental oxygen          |             |   |             |   | 1.29 (1.2 ,1.4)         | 0.000 | 1.08 (1.05 ,1.11) | 0.000 | 1.3 (1.2 ,1.4)                       | 0.000 | 1.09 (1.06 ,1.12)  | 0.000 |
| Dependent on provider        |             |   |             |   | 2.01 (1.68 ,2.41)       | 0.000 | 2.18 (2.01 ,2.36) | 0.000 | 2.01 (1.67 ,2.41)                    | 0.000 | 2.19 (2.02 ,2.38)  | 0.000 |
| Elixhauser comorbidities     |             |   |             |   |                         |       |                   |       |                                      |       |                    |       |
| Cardiac arrhythmias          |             |   |             |   | 1.62 (1.58 ,1.65)       | 0.000 | 1.17 (1.15 ,1.18) | 0.000 | 1.62 (1.58 ,1.65)                    | 0.000 | 1.17 (1.15 ,1.18)  | 0.000 |
| Valvular heart disease       |             |   |             |   | 0.95 (0.92 ,0.99)       | 0.005 | 1.04 (1.02 ,1.05) | 0.000 | 0.95 (0.92 ,0.98)                    | 0.003 | 1.03 (1.02 ,1.05)  | 0.000 |
| Pulmonary circulation        |             |   |             |   | 1.17 (1.11 ,1.23)       | 0.000 | 1.14 (1.11 ,1.16) | 0.000 | 1.17 (1.11 ,1.23)                    | 0.000 | 1.14 (1.11 ,1.16)  | 0.000 |
| Peripheral vascular disorder |             |   |             |   | 1.32 (1.27 ,1.37)       | 0.000 | 1.1 (1.08 ,1.13)  | 0.000 | 1.32 (1.27 ,1.37)                    | 0.000 | 1.1 (1.08 ,1.12)   | 0.000 |
| Hypertension, uncomplicated  |             |   |             |   | 0.74 (0.72 ,0.76)       | 0.000 | 0.78 (0.77 ,0.8)  | 0.000 | 0.74 (0.72 ,0.76)                    | 0.000 | 0.78 (0.76 ,0.79)  | 0.000 |
| Hypertension, complicated    |             |   |             |   | 0.79 (0.76 ,0.81)       | 0.000 | 0.84 (0.82 ,0.85) | 0.000 | 0.78 (0.75 ,0.81)                    | 0.000 | 0.83 (0.81 ,0.85)  | 0.000 |
| Paralysis                    |             |   |             |   | 3.73 (3.19 ,4.37)       | 0.000 | 2.95 (2.74 ,3.19) | 0.000 | 3.74 (3.19 ,4.38)                    | 0.000 | 2.95 (2.73 ,3.19)  | 0.000 |
| Neurologic disorder, other   |             |   |             |   | 4.84 (4.66 ,5.03)       | 0.000 | 2.93 (2.88 ,2.99) | 0.000 | 4.85 (4.67 ,5.04)                    | 0.000 | 2.94 (2.88 ,2.99)  | 0.000 |
| Chronic pulmonary disease    |             |   |             |   | 1.11 (1.08 ,1.14)       | 0.000 | 1.03 (1.02 ,1.05) | 0.000 | 1.11 (1.08 ,1.14)                    | 0.000 | 1.03 (1.02 ,1.05)  | 0.000 |
| Diabetes, uncomplicated      |             |   |             |   | 1.2 (1.17 ,1.23)        | 0.000 | 1.04 (1.02 ,1.06) | 0.000 | 1.2 (1.17 ,1.24)                     | 0.000 | 1.04 (1.03 ,1.06)  | 0.000 |

|                                         | Unadjusted  |   |             |   | Patient Characteristics |       |                   |       | Patient and Hospital Characteristics |        |                   |       |
|-----------------------------------------|-------------|---|-------------|---|-------------------------|-------|-------------------|-------|--------------------------------------|--------|-------------------|-------|
|                                         | STEMI       |   | NSTEMI      |   | STEMI                   |       | NSTEMI            |       | STEMI                                |        | NSTEMI            |       |
|                                         | OR (95% CI) | P | OR (95% CI) | P | OR (95% CI)             | P     | OR (95% CI)       | P     | OR (95% CI)                          | P      | OR (95% CI)       | P     |
| Diabetes, complicated                   |             |   |             |   | 1.43 (1.39, 1.47)       | 0.000 | 1.3 (1.28, 1.32)  | 0.000 | 1.42 (1.38, 1.47)                    | 0.000  | 1.3 (1.28, 1.32)  | 0.000 |
| Hypothyroidism                          |             |   |             |   | 0.93 (0.9, 0.96)        | 0.000 | 0.97 (0.96, 0.98) | 0.000 | 0.93 (0.91, 0.96)                    | 0.000  | 0.97 (0.96, 0.98) | 0.000 |
| Renal failure                           |             |   |             |   | 1.25 (1.21, 1.29)       | 0.000 | 1.17 (1.15, 1.19) | 0.000 | 1.25 (1.21, 1.29)                    | 0.000  | 1.18 (1.16, 1.2)  | 0.000 |
| Liver disease                           |             |   |             |   | 2.55 (2.42, 2.69)       | 0.000 | 1.69 (1.64, 1.75) | 0.000 | 2.55 (2.42, 2.69)                    | 0.000  | 1.69 (1.64, 1.75) | 0.000 |
| Peptic ulcer disease                    |             |   |             |   | 1.08 (0.94, 1.24)       | 0.288 | 1.12 (1.06, 1.19) | 0.000 | 1.08 (0.94, 1.24)                    | 0.29   | 1.12 (1.05, 1.19) | 0.000 |
| AIDS/HIV                                |             |   |             |   | 0.93 (0.63, 1.37)       | 0.71  | 0.96 (0.76, 1.2)  | 0.71  | 0.92 (0.62, 1.37)                    | 0.69   | 0.96 (0.76, 1.2)  | 0.704 |
| Lymphoma                                |             |   |             |   | 1.19 (1.04, 1.36)       | 0.013 | 0.99 (0.93, 1.05) | 0.656 | 1.18 (1.03, 1.35)                    | 0.02   | 0.98 (0.93, 1.05) | 0.626 |
| Metastatic cancer                       |             |   |             |   | 1.93 (1.75, 2.12)       | 0.000 | 1.86 (1.77, 1.95) | 0.000 | 1.93 (1.75, 2.12)                    | 0.000  | 1.87 (1.78, 1.96) | 0.000 |
| Solid tumor                             |             |   |             |   | 1.35 (1.27, 1.44)       | 0.000 | 1.2 (1.17, 1.24)  | 0.000 | 1.35 (1.27, 1.44)                    | 0.000  | 1.2 (1.17, 1.24)  | 0.000 |
| Rheumatoid arthritis                    |             |   |             |   | 0.95 (0.9, 1.01)        | 0.098 | 1.04 (1.01, 1.07) | 0.01  | 0.95 (0.9, 1.01)                     | 0.10   | 1.04 (1.01, 1.07) | 0.007 |
| Coagulopathy                            |             |   |             |   | 1.69 (1.61, 1.78)       | 0.000 | 1.41 (1.38, 1.44) | 0.000 | 1.69 (1.6, 1.77)                     | 0.000  | 1.4 (1.37, 1.43)  | 0.000 |
| Weight loss                             |             |   |             |   | 2.35 (2.19, 2.53)       | 0.000 | 2.5 (2.41, 2.58)  | 0.000 | 2.36 (2.19, 2.54)                    | 0.000  | 2.51 (2.43, 2.6)  | 0.000 |
| Fluid and electrolyte disorder          |             |   |             |   | 2.58 (2.51, 2.65)       | 0.000 | 1.86 (1.84, 1.89) | 0.000 | 2.58 (2.51, 2.65)                    | 0.000  | 1.86 (1.84, 1.89) | 0.000 |
| Anemia, blood loss                      |             |   |             |   | 1.26 (1.09, 1.46)       | 0.00  | 1.21 (1.15, 1.29) | 0.00  | 1.26 (1.09, 1.47)                    | 0.002  | 1.22 (1.15, 1.29) | 0.000 |
| Anemia, deficiency                      |             |   |             |   | 0.97 (0.9, 1.04)        | 0.346 | 1.05 (1.02, 1.08) | 0.000 | 0.97 (0.9, 1.03)                     | 0.34   | 1.05 (1.03, 1.08) | 0.000 |
| Alcohol abuse                           |             |   |             |   | 1.17 (1.08, 1.26)       | 0.00  | 1.19 (1.15, 1.24) | 0.000 | 1.16 (1.08, 1.25)                    | 0.000  | 1.2 (1.15, 1.24)  | 0.000 |
| Drug abuse                              |             |   |             |   | 0.93 (0.85, 1.03)       | 0.162 | 0.9 (0.85, 0.95)  | 0.000 | 0.93 (0.85, 1.03)                    | 0.1670 | 0.9 (0.85, 0.95)  | 0.000 |
| Psychoses                               |             |   |             |   | 2.36 (2.02, 2.77)       | 0.000 | 2.32 (2.17, 2.49) | 0.000 | 2.37 (2.02, 2.78)                    | 0.000  | 2.34 (2.19, 2.51) | 0.000 |
| Depression                              |             |   |             |   | 1.2 (1.16, 1.25)        | 0.000 | 1.28 (1.26, 1.31) | 0.000 | 1.2 (1.16, 1.25)                     | 0.000  | 1.28 (1.26, 1.31) | 0.000 |
| Volume of AMI hospitalizations          |             |   |             |   |                         |       |                   |       |                                      |        |                   |       |
| <200                                    |             |   |             |   |                         |       |                   |       | reference                            |        | reference         |       |
| 200-499                                 |             |   |             |   |                         |       |                   |       | 0.98 (0.91, 1.05)                    | 0.55   | 1.04 (1, 1.09)    | 0.071 |
| 500-999                                 |             |   |             |   |                         |       |                   |       | 1.09 (1.02, 1.16)                    | 0.01   | 1.18 (1.13, 1.23) | 0.000 |
| 1000-1999                               |             |   |             |   |                         |       |                   |       | 1.12 (1.05, 1.2)                     | 0.001  | 1.23 (1.17, 1.29) | 0.000 |
| 2000-                                   |             |   |             |   |                         |       |                   |       | 1.07 (0.98, 1.18)                    | 0.14   | 1.13 (1.04, 1.23) | 0.003 |
| Proportion of minority patients (AMI)   |             |   |             |   |                         |       |                   |       |                                      |        |                   |       |
| <5%                                     |             |   |             |   |                         |       |                   |       | reference                            |        | reference         |       |
| 5.0-9.9%                                |             |   |             |   |                         |       |                   |       | 1.05 (0.99, 1.11)                    | 0.09   | 1.01 (0.97, 1.06) | 0.62  |
| 10.0-24.9                               |             |   |             |   |                         |       |                   |       | 1.17 (1.11, 1.23)                    | 0.000  | 1.1 (1.05, 1.15)  | 0     |
| 25.0-49.9%                              |             |   |             |   |                         |       |                   |       | 1.05 (0.98, 1.11)                    | 0.14   | 1.02 (0.97, 1.08) | 0.398 |
| 50.0%-                                  |             |   |             |   |                         |       |                   |       | 1.13 (1.03, 1.24)                    | 0.007  | 1.03 (0.94, 1.13) | 0.48  |
| Disproportionate share percentage (DSH) |             |   |             |   |                         |       |                   |       |                                      |        |                   |       |
| 0-9.9%                                  |             |   |             |   |                         |       |                   |       | reference                            |        | reference         |       |
| 10.0-24.9%                              |             |   |             |   |                         |       |                   |       | 1.02 (0.94, 1.1)                     | 0.68   | 1.13 (1.05, 1.21) | 0.00  |
| 25.0-49.9%                              |             |   |             |   |                         |       |                   |       | 1.03 (0.95, 1.12)                    | 0.49   | 1.14 (1.06, 1.23) | 0.00  |
| 50.0%-                                  |             |   |             |   |                         |       |                   |       | 1.03 (0.93, 1.15)                    | 0.56   | 1.15 (1.04, 1.27) | 0.01  |
| Resident-to-bed ratio                   |             |   |             |   |                         |       |                   |       |                                      |        |                   |       |
| 0                                       |             |   |             |   |                         |       |                   |       | reference                            |        | reference         |       |
| >0-0.10                                 |             |   |             |   |                         |       |                   |       | 1 (0.96, 1.05)                       | 0.88   | 1 (0.96, 1.04)    | 0.903 |
| 0.11-0.20                               |             |   |             |   |                         |       |                   |       | 1.01 (0.95, 1.07)                    | 0.87   | 1.03 (0.98, 1.08) | 0.285 |
| 0.21-0.40                               |             |   |             |   |                         |       |                   |       | 1 (0.94, 1.06)                       | 0.95   | 0.99 (0.93, 1.05) | 0.714 |
| 0.41-                                   |             |   |             |   |                         |       |                   |       | 1.07 (1, 1.14)                       | 0.04   | 0.95 (0.9, 1)     | 0.069 |



|                      | Unadjusted        |       |                   |       | Patient Characteristics |       |                   |       | Patient and Hospital Characteristics |       |                   |       |
|----------------------|-------------------|-------|-------------------|-------|-------------------------|-------|-------------------|-------|--------------------------------------|-------|-------------------|-------|
|                      | STEMI             |       | NSTEMI            |       | STEMI                   |       | NSTEMI            |       | STEMI                                |       | NSTEMI            |       |
|                      | OR (95% CI)       | P     | OR (95% CI)       | P     | OR (95% CI)             | P     | OR (95% CI)       | P     | OR (95% CI)                          | P     | OR (95% CI)       | P     |
| Rurality             |                   |       |                   |       |                         |       |                   |       |                                      |       |                   |       |
| Rural hospital       |                   |       |                   |       |                         |       |                   |       | reference                            |       | reference         |       |
| Large urban hospital |                   |       |                   |       |                         |       |                   |       | 0.99 (0.92 ,1.07)                    | 0.850 | 1.08 (1.02 ,1.15) | 0.000 |
| Other urban hospital |                   |       |                   |       |                         |       |                   |       | 1.05 (0.98 ,1.13)                    | 0.14  | 1.08 (1.01 ,1.14) | 0.077 |
| Time                 | 1 (1 ,1)          | 0     | 0.99 (0.99 ,1)    | 0.000 | 0.99 (0.99 ,0.99)       | 0.000 | 0.99 (0.99 ,0.99) | 0.000 | 0.99 (0.99 ,0.99)                    | 0.000 | 0.99 (0.99 ,0.99) | 0.000 |
| Admission month      |                   |       |                   |       |                         |       |                   |       |                                      |       |                   |       |
| January              | reference         |       |                   |       | reference               |       |                   |       | reference                            |       | reference         |       |
| February             | 1.05 (1.01 ,1.09) | 0.02  | 0.97 (0.95 ,0.99) | 0.01  | 1.05 (1 ,1.1)           | 0.05  | 0.98 (0.95 ,1)    | 0.09  | 1.05 (1 ,1.1)                        | 0.05  | 0.98 (0.95 ,1)    | 0.08  |
| March                | 1.01 (0.97 ,1.06) | 0.50  | 0.97 (0.95 ,0.99) | 0.01  | 1 (0.95 ,1.05)          | 1.00  | 0.98 (0.96 ,1.01) | 0.16  | 1 (0.95 ,1.05)                       | 0.99  | 0.98 (0.96 ,1.01) | 0.15  |
| April                | 1 (0.95 ,1.04)    | 0.83  | 0.94 (0.92 ,0.97) | 0     | 1 (0.95 ,1.05)          | 0.86  | 0.96 (0.93 ,0.98) | 0.00  | 1 (0.95 ,1.05)                       | 0.88  | 0.96 (0.93 ,0.98) | 0.00  |
| May                  | 1.01 (0.97 ,1.06) | 0.54  | 0.92 (0.9 ,0.95)  | 0.000 | 0.99 (0.94 ,1.04)       | 0.78  | 0.93 (0.91 ,0.96) | 0     | 0.99 (0.95 ,1.04)                    | 0.80  | 0.93 (0.91 ,0.96) | 0.000 |
| June                 | 1.01 (0.96 ,1.05) | 0.76  | 0.92 (0.9 ,0.94)  | 0.000 | 1 (0.95 ,1.05)          | 0.94  | 0.93 (0.9 ,0.95)  | 0.000 | 1 (0.95 ,1.06)                       | 0.88  | 0.93 (0.9 ,0.95)  | 0.000 |
| July                 | 1.01 (0.97 ,1.05) | 0.68  | 0.92 (0.9 ,0.94)  | 0.000 | 0.99 (0.94 ,1.04)       | 0.78  | 0.94 (0.91 ,0.96) | 0.000 | 1 (0.95 ,1.05)                       | 0.85  | 0.94 (0.91 ,0.96) | 0.000 |
| August               | 0.96 (0.92 ,1.01) | 0.12  | 0.94 (0.92 ,0.96) | 0.000 | 0.94 (0.89 ,0.99)       | 0.02  | 0.96 (0.93 ,0.98) | 0.001 | 0.94 (0.89 ,0.99)                    | 0.02  | 0.96 (0.93 ,0.98) | 0.001 |
| September            | 1 (0.96 ,1.05)    | 0.97  | 0.95 (0.93 ,0.97) | 0.000 | 0.98 (0.93 ,1.03)       | 0.40  | 0.96 (0.94 ,0.99) | 0.007 | 0.98 (0.93 ,1.03)                    | 0.45  | 0.96 (0.94 ,0.99) | 0.01  |
| October              | 1.06 (1.02 ,1.11) | 0.01  | 0.97 (0.95 ,0.99) | 0.02  | 1.07 (1.02 ,1.12)       | 0.01  | 0.99 (0.97 ,1.02) | 0.55  | 1.07 (1.02 ,1.13)                    | 0.01  | 0.99 (0.97 ,1.02) | 0.66  |
| November             | 1.06 (1.01 ,1.1)  | 0.02  | 0.96 (0.93 ,0.98) | 0.00  | 1.04 (0.99 ,1.09)       | 0.15  | 0.97 (0.95 ,1)    | 0.05  | 1.04 (0.99 ,1.09)                    | 0.12  | 0.97 (0.95 ,1)    | 0.05  |
| December             | 0.94 (0.9 ,0.99)  | 0.011 | 0.82 (0.8 ,0.84)  | 0.00  | 0.95 (0.9 ,1.01)        | 0.081 | 0.85 (0.83 ,0.88) | 0.000 | 0.96 (0.91 ,1.01)                    | 0.102 | 0.85 (0.83 ,0.88) | 0.00  |
| COVID-19 month       |                   |       |                   |       |                         |       |                   |       |                                      |       |                   |       |
| March                | reference         |       |                   |       | reference               |       |                   |       | reference                            |       | reference         |       |
| April                | 0.95 (0.86 ,1.05) | 0.32  | 0.87 (0.82 ,0.93) | 0.000 | 0.96 (0.85 ,1.08)       | 0.466 | 0.88 (0.83 ,0.94) | 0.000 | 0.96 (0.85 ,1.08)                    | 0.481 | 0.89 (0.83 ,0.95) | 0.000 |
| May                  | 0.87 (0.77 ,0.98) | 0.03  | 0.82 (0.76 ,0.88) | 0     | 0.84 (0.73 ,0.98)       | 0.02  | 0.82 (0.76 ,0.88) | 0.00  | 0.86 (0.74 ,0.99)                    | 0.036 | 0.83 (0.77 ,0.9)  | 0.000 |
| June                 | 0.88 (0.79 ,0.98) | 0.03  | 0.84 (0.79 ,0.89) | 0     | 0.83 (0.73 ,0.95)       | 0.01  | 0.83 (0.78 ,0.89) | 0.00  | 0.84 (0.74 ,0.96)                    | 0.01  | 0.84 (0.79 ,0.9)  | 0.000 |
| July                 | 0.95 (0.85 ,1.05) | 0.32  | 0.86 (0.81 ,0.91) | 0     | 0.89 (0.78 ,1.01)       | 0.06  | 0.87 (0.81 ,0.93) | 0     | 0.9 (0.79 ,1.02)                     | 0.09  | 0.88 (0.83 ,0.95) | 0.000 |
| August               | 0.94 (0.84 ,1.05) | 0.25  | 0.86 (0.8 ,0.92)  | 0     | 0.95 (0.83 ,1.08)       | 0.42  | 0.83 (0.77 ,0.9)  | 0     | 0.96 (0.84 ,1.1)                     | 0.55  | 0.85 (0.79 ,0.91) | 0.000 |
| September            | 0.94 (0.83 ,1.06) | 0.30  | 0.97 (0.9 ,1.04)  | 0.348 | 0.92 (0.79 ,1.06)       | 0.25  | 0.96 (0.89 ,1.03) | 0.256 | 0.93 (0.81 ,1.08)                    | 0.34  | 0.98 (0.9 ,1.05)  | 0.53  |
| October              | 0.97 (0.85 ,1.1)  | 0.65  | 0.87 (0.8 ,0.94)  | 0.00  | 0.91 (0.78 ,1.05)       | 0.19  | 0.87 (0.8 ,0.94)  | 0.00  | 0.92 (0.79 ,1.06)                    | 0.24  | 0.89 (0.82 ,0.96) | 0.005 |
| November             | 0.95 (0.84 ,1.07) | 0.39  | 0.85 (0.79 ,0.92) | 0     | 0.88 (0.76 ,1.01)       | 0.07  | 0.85 (0.79 ,0.93) | 0.00  | 0.89 (0.77 ,1.02)                    | 0.10  | 0.87 (0.8 ,0.95)  | 0.001 |

**eTable 6. Revascularization after STEMI and NSTEMI**

|                                       | Unadjusted       |       |                  |       | Patient Characteristics |       |                  |       | Patient and Hospital Characteristics |       |                  |       |
|---------------------------------------|------------------|-------|------------------|-------|-------------------------|-------|------------------|-------|--------------------------------------|-------|------------------|-------|
|                                       | STEMI            |       | NSTEMI           |       | STEMI                   |       | NSTEMI           |       | STEMI                                |       | NSTEMI           |       |
|                                       | OR (95% CI)      | P     | OR (95% CI)      | P     | OR (95% CI)             | P     | OR (95% CI)      | P     | OR (95% CI)                          | P     | OR (95% CI)      | P     |
| <b>Race</b>                           |                  |       |                  |       |                         |       |                  |       |                                      |       |                  |       |
| White                                 | reference        |       |                  |       | reference               |       |                  |       | reference                            |       | reference        |       |
| Black                                 | 0.55 (0.53,0.58) | 0.000 | 0.56 (0.54,0.59) | 0.000 | 0.72 (0.69,0.76)        | 0.000 | 0.69 (0.66,0.72) | 0.000 | 0.76 (0.72,0.8)                      | 0.000 | 0.73 (0.71,0.75) | 0.000 |
| Hispanic                              | 0.65 (0.59,0.71) | 0.000 | 0.64 (0.59,0.69) | 0.000 | 0.73 (0.66,0.82)        | 0.000 | 0.69 (0.62,0.76) | 0.000 | 0.81 (0.75,0.88)                     | 0.000 | 0.81 (0.76,0.86) | 0.000 |
| <b>Age</b>                            |                  |       |                  |       |                         |       |                  |       |                                      |       |                  |       |
| 65-69                                 | reference        |       |                  |       | reference               |       |                  |       | reference                            |       | reference        |       |
| 70-74                                 | 0.92 (0.89,0.95) | 0.000 | 0.93 (0.92,0.94) | 0.000 | 0.9 (0.87,0.93)         | 0.000 | 0.91 (0.89,0.92) | 0.000 | 0.9 (0.87,0.93)                      | 0.000 | 0.91 (0.9,0.92)  | 0.000 |
| 75-79                                 | 0.72 (0.7,0.74)  | 0.000 | 0.79 (0.78,0.8)  | 0.000 | 0.76 (0.74,0.78)        | 0.000 | 0.81 (0.79,0.82) | 0.000 | 0.76 (0.74,0.79)                     | 0.000 | 0.81 (0.8,0.82)  | 0.000 |
| 80-84                                 | 0.53 (0.51,0.55) | 0.000 | 0.6 (0.59,0.61)  | 0.000 | 0.59 (0.57,0.61)        | 0.000 | 0.65 (0.64,0.66) | 0.000 | 0.59 (0.57,0.62)                     | 0.000 | 0.66 (0.65,0.67) | 0.000 |
| 85-89                                 | 0.33 (0.31,0.34) | 0.000 | 0.38 (0.37,0.39) | 0.000 | 0.38 (0.36,0.39)        | 0.000 | 0.43 (0.42,0.44) | 0.000 | 0.38 (0.37,0.4)                      | 0.000 | 0.44 (0.43,0.45) | 0.000 |
| 90-94                                 | 0.17 (0.16,0.17) | 0.000 | 0.17 (0.17,0.18) | 0.000 | 0.19 (0.18,0.2)         | 0.000 | 0.2 (0.2,0.21)   | 0.000 | 0.2 (0.19,0.21)                      | 0.000 | 0.21 (0.2,0.22)  | 0.000 |
| 95-                                   | 0.07 (0.07,0.08) | 0.000 | 0.06 (0.05,0.06) | 0.000 | 0.09 (0.08,0.09)        | 0.000 | 0.07 (0.07,0.08) | 0.000 | 0.09 (0.08,0.1)                      | 0.000 | 0.08 (0.07,0.08) | 0.000 |
| <b>Hospital Covid-19 burden</b>       |                  |       |                  |       |                         |       |                  |       |                                      |       |                  |       |
| Before Covid-19                       | reference        |       |                  |       | reference               |       |                  |       | reference                            |       | reference        |       |
| 0.0-2.0%                              | 0.91 (0.86,0.97) | 0.004 | 0.95 (0.93,0.98) | 0.001 | 0.93 (0.87,1)           | 0.04  | 0.96 (0.93,0.99) | 0.006 | 0.94 (0.88,1.01)                     | 0.09  | 0.96 (0.93,0.99) | 0.01  |
| 2.1-10.0%                             | 0.97 (0.88,1.08) | 0.58  | 0.96 (0.91,1.02) | 0.20  | 1.04 (0.93,1.16)        | 0.47  | 1.01 (0.96,1.07) | 0.73  | 1.01 (0.9,1.13)                      | 0.87  | 0.94 (0.89,0.99) | 0.02  |
| 10.1-20.0%                            | 0.9 (0.79,1.03)  | 0.13  | 0.88 (0.82,0.94) | 0.000 | 0.96 (0.83,1.1)         | 0.53  | 0.95 (0.88,1.02) | 0.16  | 0.96 (0.83,1.1)                      | 0.55  | 0.95 (0.88,1.01) | 0.12  |
| 20.1-30.0%                            | 0.93 (0.77,1.12) | 0.46  | 0.83 (0.75,0.91) | 0.000 | 1.08 (0.88,1.33)        | 0.47  | 0.91 (0.83,1)    | 0.049 | 1.1 (0.89,1.36)                      | 0.36  | 0.95 (0.86,1.04) | 0.28  |
| 30.1%-                                | 0.84 (0.66,1.06) | 0.14  | 0.64 (0.56,0.73) | 0.000 | 0.92 (0.71,1.19)        | 0.52  | 0.73 (0.64,0.83) | 0.000 | 1.01 (0.78,1.3)                      | 0.96  | 0.83 (0.73,0.95) | 0.007 |
| <b>Sex</b>                            |                  |       |                  |       |                         |       |                  |       |                                      |       |                  |       |
| Male                                  |                  |       |                  |       | reference               |       |                  |       | reference                            |       | reference        |       |
| Female                                |                  |       |                  |       | 0.72 (0.71,0.74)        | 0.000 | 0.67 (0.66,0.67) | 0.000 | 0.72 (0.71,0.74)                     | 0.000 | 0.67 (0.66,0.67) | 0.000 |
| <b>Urgency</b>                        |                  |       |                  |       |                         |       |                  |       |                                      |       |                  |       |
| Urgent                                |                  |       |                  |       | 0.92 (0.87,0.97)        | 0.004 | 1.09 (1.03,1.16) | 0.005 | 0.91 (0.86,0.96)                     | 0.001 | 1.1 (1.03,1.16)  | 0.002 |
| Emergent                              |                  |       |                  |       | reference               |       |                  |       | reference                            |       | reference        |       |
| <b>Admission source</b>               |                  |       |                  |       |                         |       |                  |       |                                      |       |                  |       |
| Community                             |                  |       |                  |       | reference               |       |                  |       | reference                            |       | reference        |       |
| Hospital                              |                  |       |                  |       | 0.91 (0.86,0.97)        | 0.004 | 1.67 (1.58,1.75) | 0.000 | 0.84 (0.8,0.89)                      | 0.000 | 1.33 (1.27,1.4)  | 0.000 |
| SNF/Nursing Home                      |                  |       |                  |       | 0.39 (0.35,0.43)        | 0.000 | 0.45 (0.42,0.48) | 0.000 | 0.39 (0.35,0.43)                     | 0.000 | 0.45 (0.42,0.48) | 0.000 |
| Other                                 |                  |       |                  |       | 0.9 (0.81,1)            | 0.05  | 1.32 (1.23,1.41) | 0.000 | 0.87 (0.78,0.97)                     | 0.01  | 1.16 (1.08,1.25) | 0.000 |
| Dual-eligible                         |                  |       |                  |       | 0.77 (0.74,0.8)         | 0.000 | 0.77 (0.75,0.79) | 0.000 | 0.78 (0.76,0.81)                     | 0.000 | 0.8 (0.78,0.81)  | 0.000 |
| <b>Body Mass Index</b>                |                  |       |                  |       |                         |       |                  |       |                                      |       |                  |       |
| Underweight                           |                  |       |                  |       | 0.59 (0.54,0.65)        | 0.000 | 0.63 (0.6,0.67)  | 0.000 | 0.58 (0.53,0.64)                     | 0.00  | 0.61 (0.58,0.65) | 0.000 |
| Morbid obesity                        |                  |       |                  |       | 1.01 (0.95,1.08)        | 0.70  | 1.03 (1,1.05)    | 0.045 | 1.01 (0.94,1.08)                     | 0.79  | 1.02 (0.99,1.04) | 0.12  |
| <b>Myocardial infarction location</b> |                  |       |                  |       |                         |       |                  |       |                                      |       |                  |       |
| Inferior wall                         |                  |       |                  |       | reference               |       | NA               |       | reference                            |       | NA               |       |
| Anterior wall                         |                  |       |                  |       | 0.99 (0.96,1.01)        | 0.31  | NA               |       | 0.99 (0.97,1.02)                     | 0.66  | NA               |       |
| Lateral wall                          |                  |       |                  |       | 0.69 (0.65,0.73)        | 0.000 | NA               |       | 0.7 (0.66,0.74)                      | 0.000 | NA               |       |
| Unspecified                           |                  |       |                  |       | 0.24 (0.23,0.25)        | 0.000 | NA               |       | 0.25 (0.24,0.26)                     | 0.000 | NA               |       |

|                              | Unadjusted  |   |             |   | Patient Characteristics |       |                   |       | Patient and Hospital Characteristics |       |                   |       |
|------------------------------|-------------|---|-------------|---|-------------------------|-------|-------------------|-------|--------------------------------------|-------|-------------------|-------|
|                              | STEMI       |   | NSTEMI      |   | STEMI                   |       | NSTEMI            |       | STEMI                                |       | NSTEMI            |       |
|                              | OR (95% CI) | P | OR (95% CI) | P | OR (95% CI)             | P     | OR (95% CI)       | P     | OR (95% CI)                          | P     | OR (95% CI)       | P     |
| Congestive heart failure     |             |   |             |   |                         |       |                   |       |                                      |       |                   |       |
| Systolic                     |             |   |             |   | 0.86 (0.83 ,0.89)       | 0.000 | 0.8 (0.79 ,0.82)  | 0.000 | 0.86 (0.83 ,0.89)                    | 0.000 | 0.78 (0.76 ,0.79) | 0.000 |
| Diastolic                    |             |   |             |   | 0.84 (0.8 ,0.88)        | 0.000 | 0.76 (0.74 ,0.78) | 0.000 | 0.84 (0.8 ,0.88)                     | 0.000 | 0.75 (0.73 ,0.76) | 0.000 |
| Systolic & Diastolic         |             |   |             |   | 0.83 (0.78 ,0.87)       | 0.000 | 0.81 (0.79 ,0.83) | 0.000 | 0.82 (0.78 ,0.87)                    | 0.000 | 0.79 (0.77 ,0.82) | 0.000 |
| Unspecified                  |             |   |             |   | 0.63 (0.6 ,0.66)        | 0.000 | 0.66 (0.64 ,0.68) | 0.000 | 0.65 (0.62 ,0.68)                    | 0.000 | 0.69 (0.67 ,0.71) | 0.000 |
| Right heart failure          |             |   |             |   | 0.83 (0.68 ,1.02)       | 0.08  | 0.84 (0.74 ,0.96) | 0.000 | 0.83 (0.68 ,1.03)                    | 0.09  | 0.85 (0.74 ,0.96) | 0.01  |
| Biventricular heart failure  |             |   |             |   | 0.73 (0.59 ,0.9)        | 0.004 | 0.85 (0.75 ,0.96) | 0.008 | 0.71 (0.57 ,0.88)                    | 0.002 | 0.8 (0.71 ,0.91)  | 0.001 |
| End-stage heart failure      |             |   |             |   | 0.54 (0.37 ,0.78)       | 0.001 | 0.65 (0.55 ,0.76) | 0.01  | 0.54 (0.37 ,0.78)                    | 0.001 | 0.63 (0.54 ,0.74) | 0.000 |
| Complications of AMI         |             |   |             |   |                         |       |                   |       |                                      |       |                   |       |
| Ventricular septal defect    |             |   |             |   | 0.6 (0.5 ,0.7)          | 0.000 | 1 (0.6 ,1.5)      | 0.84  | 0.6 (0.5 ,0.7)                       | 0.000 | 0.9 (0.5 ,1.4)    | 0.57  |
| LV rupture                   |             |   |             |   | 0.5 (0.4 ,0.6)          | 0.000 | 1.1 (0.7 ,1.7)    | 0.64  | 0.5 (0.3 ,0.6)                       | 0.000 | 1.1 (0.7 ,1.8)    | 0.72  |
| Papillary muscle rupture     |             |   |             |   | 0.9 (0.5 ,1.4)          | 0.56  | 1.8 (1.2 ,2.8)    | 0.005 | 0.8 (0.5 ,1.3)                       | 0.48  | 1.7 (1.1 ,2.7)    | 0.02  |
| Prior procedures             |             |   |             |   |                         |       |                   |       |                                      |       |                   |       |
| PCI                          |             |   |             |   | 0.92 (0.89 ,0.96)       | 0.000 | 1.01 (0.99 ,1.03) | 0.50  | 0.92 (0.89 ,0.96)                    | 0.000 | 0.99 (0.97 ,1)    | 0.14  |
| CABG                         |             |   |             |   | 0.45 (0.43 ,0.47)       | 0.000 | 0.6 (0.59 ,0.61)  | 0.000 | 0.44 (0.42 ,0.46)                    | 0.000 | 0.58 (0.57 ,0.59) | 0.000 |
| Heart valve surgery          |             |   |             |   | 0.66 (0.6 ,0.72)        | 0.000 | 0.72 (0.7 ,0.75)  | 0.000 | 0.65 (0.6 ,0.72)                     | 0.000 | 0.7 (0.68 ,0.73)  | 0.000 |
| Dialysis                     |             |   |             |   | 0.55 (0.51 ,0.6)        | 0.000 | 0.86 (0.83 ,0.88) | 0.000 | 0.55 (0.51 ,0.6)                     | 0.000 | 0.86 (0.83 ,0.88) | 0.000 |
| AICD                         |             |   |             |   | 0.53 (0.48 ,0.58)       | 0.000 | 0.68 (0.66 ,0.7)  | 0.000 | 0.53 (0.48 ,0.58)                    | 0.000 | 0.67 (0.65 ,0.68) | 0.000 |
| COVID                        |             |   |             |   | 0.56 (0.45 ,0.71)       | 0.000 | 0.43 (0.37 ,0.5)  | 0.000 | 0.55 (0.44 ,0.7)                     | 0.000 | 0.42 (0.36 ,0.49) | 0.000 |
| Functional Status            |             |   |             |   |                         |       |                   |       |                                      |       |                   |       |
| Wheel-chair                  |             |   |             |   | 0.51 (0.43 ,0.6)        | 0.000 | 0.59 (0.55 ,0.64) | 0.000 | 0.51 (0.43 ,0.6)                     | 0.000 | 0.57 (0.53 ,0.62) | 0.000 |
| Supplemental oxygen          |             |   |             |   | 0.67 (0.62 ,0.72)       | 0.000 | 0.7 (0.68 ,0.72)  | 0.000 | 0.68 (0.63 ,0.73)                    | 0.000 | 0.71 (0.69 ,0.73) | 0.000 |
| Dependent on provider        |             |   |             |   | 0.32 (0.26 ,0.38)       | 0.000 | 0.35 (0.31 ,0.4)  | 0.000 | 0.33 (0.27 ,0.39)                    | 0.000 | 0.36 (0.32 ,0.41) | 0.000 |
| Elixhauser comorbidities     |             |   |             |   |                         |       |                   |       |                                      |       |                   |       |
| Cardiac arrhythmias          |             |   |             |   | 0.88 (0.86 ,0.9)        | 0.000 | 0.8 (0.79 ,0.81)  | 0.000 | 0.87 (0.85 ,0.89)                    | 0.000 | 0.78 (0.77 ,0.79) | 0.000 |
| Valvular heart disease       |             |   |             |   | 0.89 (0.86 ,0.92)       | 0.000 | 0.98 (0.97 ,1)    | 0.04  | 0.87 (0.84 ,0.9)                     | 0.000 | 0.94 (0.93 ,0.96) | 0.000 |
| Pulmonary circulation        |             |   |             |   | 0.77 (0.73 ,0.81)       | 0.000 | 0.84 (0.82 ,0.86) | 0.000 | 0.76 (0.73 ,0.8)                     | 0.000 | 0.83 (0.81 ,0.85) | 0.000 |
| Peripheral vascular disorder |             |   |             |   | 0.85 (0.81 ,0.88)       | 0.000 | 1.05 (1.03 ,1.08) | 0.000 | 0.83 (0.8 ,0.87)                     | 0.000 | 1.03 (1 ,1.05)    | 0.03  |
| Hypertension, uncomplicated  |             |   |             |   | 1.11 (1.08 ,1.14)       | 0.000 | 1.18 (1.16 ,1.2)  | 0.000 | 1.1 (1.06 ,1.13)                     | 0.000 | 1.16 (1.14 ,1.18) | 0.000 |
| Hypertension, complicated    |             |   |             |   | 1.1 (1.06 ,1.14)        | 0.000 | 1.2 (1.17 ,1.23)  | 0.000 | 1.08 (1.04 ,1.12)                    | 0.000 | 1.17 (1.14 ,1.19) | 0.000 |
| Paralysis                    |             |   |             |   | 0.65 (0.56 ,0.74)       | 0.000 | 0.77 (0.72 ,0.83) | 0.000 | 0.64 (0.56 ,0.74)                    | 0.000 | 0.75 (0.7 ,0.81)  | 0.000 |
| Neurologic disorder, other   |             |   |             |   | 0.48 (0.47 ,0.5)        | 0.000 | 0.58 (0.56 ,0.59) | 0.000 | 0.48 (0.46 ,0.5)                     | 0.000 | 0.57 (0.56 ,0.58) | 0.000 |
| Chronic pulmonary disease    |             |   |             |   | 0.86 (0.84 ,0.88)       | 0.000 | 0.84 (0.83 ,0.85) | 0.000 | 0.86 (0.84 ,0.89)                    | 0.000 | 0.84 (0.83 ,0.85) | 0.000 |
| Diabetes, uncomplicated      |             |   |             |   | 0.9 (0.88 ,0.93)        | 0.000 | 0.98 (0.97 ,1)    | 0.01  | 0.91 (0.88 ,0.94)                    | 0.000 | 1 (0.98 ,1.01)    | 0.83  |

|                                         | Unadjusted  |   |             |   | Patient Characteristics |       |                  |       | Patient and Hospital Characteristics |       |                  |       |
|-----------------------------------------|-------------|---|-------------|---|-------------------------|-------|------------------|-------|--------------------------------------|-------|------------------|-------|
|                                         | STEMI       |   | NSTEMI      |   | STEMI                   |       | NSTEMI           |       | STEMI                                |       | NSTEMI           |       |
|                                         | OR (95% CI) | P | OR (95% CI) | P | OR (95% CI)             | P     | OR (95% CI)      | P     | OR (95% CI)                          | P     | OR (95% CI)      | P     |
| Diabetes, complicated                   |             |   |             |   | 0.93 (0.9,0.96)         | 0.000 | 1.08 (1.07,1.1)  | 0.000 | 0.92 (0.89,0.95)                     | 0.000 | 1.07 (1.06,1.09) | 0.000 |
| Hypothyroidism                          |             |   |             |   | 0.99 (0.96,1.01)        | 0.32  | 0.99 (0.97,1)    | 0.03  | 0.98 (0.95,1.01)                     | 0.21  | 0.98 (0.97,0.99) | 0.001 |
| Renal failure                           |             |   |             |   | 0.84 (0.81,0.87)        | 0.000 | 0.81 (0.8,0.83)  | 0.000 | 0.85 (0.82,0.88)                     | 0.000 | 0.81 (0.79,0.82) | 0.000 |
| Liver disease                           |             |   |             |   | 0.73 (0.69,0.77)        | 0.000 | 0.74 (0.72,0.77) | 0.000 | 0.72 (0.68,0.76)                     | 0.000 | 0.73 (0.7,0.75)  | 0.000 |
| Peptic ulcer disease                    |             |   |             |   | 1.02 (0.87,1.18)        | 0.83  | 0.85 (0.81,0.9)  | 0.000 | 1.02 (0.87,1.19)                     | 0.80  | 0.83 (0.79,0.88) | 0.000 |
| AIDS/HIV                                |             |   |             |   | 1.2 (0.79,1.84)         | 0.39  | 1.01 (0.85,1.2)  | 0.92  | 1.24 (0.81,1.92)                     | 0.32  | 0.98 (0.82,1.16) | 0.81  |
| Lymphoma                                |             |   |             |   | 0.76 (0.67,0.87)        | 0.000 | 0.71 (0.67,0.74) | 0.000 | 0.75 (0.66,0.85)                     | 0.000 | 0.68 (0.65,0.72) | 0.000 |
| Metastatic cancer                       |             |   |             |   | 0.42 (0.39,0.46)        | 0.000 | 0.49 (0.47,0.51) | 0.000 | 0.42 (0.38,0.46)                     | 0.000 | 0.48 (0.46,0.5)  | 0.000 |
| Solid tumor                             |             |   |             |   | 0.65 (0.61,0.69)        | 0.000 | 0.69 (0.67,0.71) | 0.000 | 0.65 (0.61,0.69)                     | 0.000 | 0.68 (0.66,0.7)  | 0.000 |
| Rheumatoid arthritis                    |             |   |             |   | 1.06 (1,1.13)           | 0.05  | 1 (0.98,1.02)    | 0.95  | 1.06 (1,1.13)                        | 0.048 | 0.98 (0.95,1)    | 0.07  |
| Coagulopathy                            |             |   |             |   | 0.88 (0.84,0.93)        | 0.000 | 1.01 (0.98,1.03) | 0.52  | 0.87 (0.83,0.92)                     | 0.000 | 0.98 (0.96,1.01) | 0.200 |
| Weight loss                             |             |   |             |   | 0.68 (0.64,0.73)        | 0.000 | 0.71 (0.68,0.74) | 0.000 | 0.69 (0.64,0.74)                     | 0.000 | 0.71 (0.69,0.74) | 0.000 |
| Fluid and electrolyte disorder          |             |   |             |   | 0.64 (0.62,0.65)        | 0.000 | 0.7 (0.69,0.71)  | 0.000 | 0.64 (0.62,0.66)                     | 0.000 | 0.7 (0.69,0.71)  | 0.000 |
| Anemia, blood loss                      |             |   |             |   | 0.77 (0.67,0.88)        | 0.000 | 0.76 (0.72,0.81) | 0.000 | 0.79 (0.69,0.91)                     | 0.001 | 0.76 (0.72,0.81) | 0.000 |
| Anemia, deficiency                      |             |   |             |   | 0.89 (0.83,0.95)        | 0.000 | 0.85 (0.83,0.88) | 0.000 | 0.89 (0.83,0.95)                     | 0.001 | 0.84 (0.82,0.87) | 0.000 |
| Alcohol abuse                           |             |   |             |   | 0.8 (0.74,0.86)         | 0.000 | 0.8 (0.78,0.83)  | 0.000 | 0.79 (0.73,0.86)                     | 0.00  | 0.81 (0.78,0.83) | 0.000 |
| Drug abuse                              |             |   |             |   | 0.91 (0.83,1)           | 0.06  | 0.8 (0.76,0.83)  | 0.000 | 0.91 (0.83,1)                        | 0.06  | 0.8 (0.76,0.83)  | 0.000 |
| Psychoses                               |             |   |             |   | 0.47 (0.41,0.53)        | 0.000 | 0.48 (0.44,0.51) | 0.000 | 0.48 (0.41,0.55)                     | 0.000 | 0.49 (0.45,0.52) | 0.000 |
| Depression                              |             |   |             |   | 0.84 (0.81,0.87)        | 0.000 | 0.9 (0.88,0.92)  | 0.000 | 0.83 (0.8,0.87)                      | 0.000 | 0.88 (0.87,0.9)  | 0.000 |
| Volume of AMI hospitalizations          |             |   |             |   |                         |       |                  |       |                                      |       |                  |       |
| <200                                    |             |   |             |   |                         |       |                  |       | reference                            |       | reference        |       |
| 200-499                                 |             |   |             |   |                         |       |                  |       | 2.52 (2.23,2.85)                     | 0.000 | 3.14 (2.75,3.59) | 0.000 |
| 500-999                                 |             |   |             |   |                         |       |                  |       | 3.07 (2.73,3.44)                     | 0.000 | 4.63 (4.09,5.26) | 0.000 |
| 1000-1999                               |             |   |             |   |                         |       |                  |       | 3.19 (2.83,3.59)                     | 0.000 | 5.37 (4.72,6.11) | 0.000 |
| 2000-                                   |             |   |             |   |                         |       |                  |       | 2.96 (2.52,3.47)                     | 0.000 | 5.43 (4.66,6.34) | 0.000 |
| Proportion of minority patients (AMI)   |             |   |             |   |                         |       |                  |       |                                      |       |                  |       |
| <5%                                     |             |   |             |   |                         |       |                  |       | reference                            |       | reference        |       |
| 5.0-9.9%                                |             |   |             |   |                         |       |                  |       | 1 (0.93,1.07)                        | 0.92  | 0.98 (0.9,1.05)  | 0.52  |
| 10.0-24.9                               |             |   |             |   |                         |       |                  |       | 1 (0.93,1.07)                        | 0.99  | 1.05 (0.98,1.12) | 0.20  |
| 25.0-49.9%                              |             |   |             |   |                         |       |                  |       | 0.96 (0.88,1.05)                     | 0.34  | 0.97 (0.89,1.06) | 0.57  |
| 50.0%-                                  |             |   |             |   |                         |       |                  |       | 0.7 (0.58,0.83)                      | 0.000 | 0.65 (0.55,0.76) | 0.000 |
| Disproportionate share percentage (DSH) |             |   |             |   |                         |       |                  |       |                                      |       |                  |       |
| 0-9.9%                                  |             |   |             |   |                         |       |                  |       | reference                            |       | reference        |       |
| 10.0-24.9%                              |             |   |             |   |                         |       |                  |       | 1.01 (0.91,1.12)                     | 0.88  | 1 (0.88,1.13)    | 0.97  |
| 25.0-49.9%                              |             |   |             |   |                         |       |                  |       | 1.05 (0.94,1.17)                     | 0.39  | 1.01 (0.89,1.16) | 0.84  |
| 50.0%-                                  |             |   |             |   |                         |       |                  |       | 1.32 (1.13,1.55)                     | 0.00  | 1.18 (0.99,1.4)  | 0.07  |
| Resident-to-bed ratio                   |             |   |             |   |                         |       |                  |       |                                      |       |                  |       |
| 0                                       |             |   |             |   |                         |       |                  |       | reference                            |       | reference        |       |
| >0-0.10                                 |             |   |             |   |                         |       |                  |       | 0.97 (0.91,1.04)                     | 0.41  | 1.05 (0.98,1.12) | 0.14  |
| 0.11-0.20                               |             |   |             |   |                         |       |                  |       | 1.05 (0.97,1.13)                     | 0.25  | 1.09 (1,1.18)    | 0.04  |
| 0.21-0.40                               |             |   |             |   |                         |       |                  |       | 0.95 (0.87,1.04)                     | 0.29  | 1.04 (0.95,1.15) | 0.38  |
| 0.41-                                   |             |   |             |   |                         |       |                  |       | 0.94 (0.85,1.03)                     | 0.19  | 1.2 (1.1,1.32)   | 0.000 |

|                      | Unadjusted       |       |                  |       | Patient Characteristics |       |                  |       | Patient and Hospital Characteristics |       |                  |       |
|----------------------|------------------|-------|------------------|-------|-------------------------|-------|------------------|-------|--------------------------------------|-------|------------------|-------|
|                      | STEMI            |       | NSTEMI           |       | STEMI                   |       | NSTEMI           |       | STEMI                                |       | NSTEMI           |       |
|                      | OR (95% CI)      | P     | OR (95% CI)      | P     | OR (95% CI)             | P     | OR (95% CI)      | P     | OR (95% CI)                          | P     | OR (95% CI)      | P     |
| Rurality             |                  |       |                  |       |                         |       |                  |       |                                      |       |                  |       |
| Rural hospital       |                  |       |                  |       |                         |       |                  |       | reference                            |       | reference        |       |
| Large urban hospital |                  |       |                  |       |                         |       |                  |       | 1.1 (1,1.22)                         | 0.047 | 1.16 (1.04,1.29) | 0.008 |
| Other urban hospital |                  |       |                  |       |                         |       |                  |       | 1.1 (1,1.21)                         | 0.048 | 1.21 (1.09,1.34) | 0.000 |
| Time                 | 1.01 (1.01,1.01) | 0     | 1.01 (1.01,1.01) | 0.000 | 1.01 (1.01,1.01)        | 0.000 | 1.01 (1.01,1.01) | 0.000 | 1.01 (1.01,1.01)                     | 0.000 | 1.01 (1,1.01)    | 0.000 |
| Admission month      |                  |       |                  |       |                         |       |                  |       |                                      |       |                  |       |
| January              | reference        |       |                  |       | reference               |       |                  |       | reference                            |       | reference        |       |
| February             | 0.99 (0.94,1.03) | 0.56  | 1 (0.98,1.02)    | 0.76  | 1.01 (0.96,1.06)        | 0.83  | 1 (0.98,1.02)    | 0.99  | 1.01 (0.96,1.06)                     | 0.77  | 1 (0.98,1.02)    | 0.70  |
| March                | 0.99 (0.95,1.04) | 0.73  | 1.02 (1,1.05)    | 0.03  | 1.01 (0.96,1.07)        | 0.66  | 1.02 (1,1.04)    | 0.07  | 1.01 (0.96,1.07)                     | 0.59  | 1.01 (0.99,1.03) | 0.31  |
| April                | 1.01 (0.96,1.06) | 0.79  | 1.04 (1.01,1.06) | 0.001 | 1.01 (0.96,1.06)        | 0.77  | 1.02 (1,1.05)    | 0.03  | 1.01 (0.96,1.07)                     | 0.69  | 1.02 (0.99,1.04) | 0.14  |
| May                  | 0.96 (0.91,1.01) | 0.09  | 1.04 (1.02,1.07) | 0.000 | 0.97 (0.92,1.02)        | 0.26  | 1.03 (1.01,1.05) | 0.005 | 0.97 (0.92,1.02)                     | 0.27  | 1.02 (1,1.04)    | 0.06  |
| June                 | 0.96 (0.91,1.01) | 0.09  | 1.02 (1,1.05)    | 0.03  | 0.97 (0.92,1.02)        | 0.23  | 1.01 (0.99,1.04) | 0.24  | 0.97 (0.92,1.02)                     | 0.29  | 1 (0.98,1.02)    | 0.98  |
| July                 | 0.96 (0.91,1)    | 0.08  | 1.01 (0.99,1.03) | 0.42  | 0.97 (0.92,1.02)        | 0.30  | 0.99 (0.97,1.02) | 0.63  | 0.98 (0.93,1.03)                     | 0.36  | 0.98 (0.96,1.01) | 0.16  |
| August               | 0.94 (0.9,0.99)  | 0.02  | 1.01 (0.99,1.03) | 0.40  | 0.96 (0.91,1.01)        | 0.12  | 1 (0.98,1.02)    | 0.99  | 0.96 (0.91,1.01)                     | 0.16  | 0.99 (0.97,1.01) | 0.44  |
| September            | 0.9 (0.86,0.95)  | 0.000 | 0.98 (0.96,1)    | 0.04  | 0.92 (0.87,0.97)        | 0.002 | 0.97 (0.95,0.99) | 0.006 | 0.92 (0.87,0.97)                     | 0.00  | 0.96 (0.94,0.98) | 0.000 |
| October              | 0.96 (0.91,1)    | 0.07  | 1 (0.98,1.02)    | 0.92  | 0.96 (0.91,1.01)        | 0.15  | 0.99 (0.97,1.01) | 0.38  | 0.96 (0.91,1.02)                     | 0.19  | 0.99 (0.96,1.01) | 0.25  |
| November             | 0.92 (0.88,0.97) | 0.001 | 0.99 (0.96,1.01) | 0.17  | 0.94 (0.89,0.99)        | 0.02  | 0.98 (0.96,1)    | 0.05  | 0.95 (0.9,1)                         | 0.04  | 0.97 (0.95,1)    | 0.02  |
| December             | 0.91 (0.86,0.95) | 0.000 | 0.9 (0.88,0.92)  | 0.00  | 0.9 (0.85,0.95)         | 0.000 | 0.87 (0.85,0.89) | 0.000 | 0.91 (0.86,0.96)                     | 0.000 | 0.87 (0.85,0.89) | 0.000 |
| COVID-19 month       |                  |       |                  |       |                         |       |                  |       |                                      |       |                  |       |
| March                | reference        |       |                  |       | reference               |       |                  |       | reference                            |       | reference        |       |
| April                | 0.98 (0.88,1.09) | 0.67  | 0.99 (0.94,1.03) | 0.55  | 0.94 (0.83,1.05)        | 0.28  | 0.96 (0.92,1.01) | 0.14  | 0.94 (0.83,1.05)                     | 0.271 | 0.97 (0.92,1.03) | 0.31  |
| May                  | 0.97 (0.85,1.1)  | 0.61  | 1.12 (1.05,1.19) | 0.000 | 0.92 (0.8,1.05)         | 0.23  | 1.08 (1.01,1.15) | 0.02  | 0.93 (0.81,1.07)                     | 0.32  | 1.12 (1.05,1.19) | 0.00  |
| June                 | 0.99 (0.88,1.12) | 0.90  | 1.06 (1,1.12)    | 0.05  | 1 (0.88,1.14)           | 1.00  | 1.04 (0.98,1.1)  | 0.18  | 1.02 (0.9,1.16)                      | 0.77  | 1.08 (1.02,1.14) | 0.01  |
| July                 | 1 (0.89,1.12)    | 0.97  | 1.05 (0.99,1.1)  | 0.09  | 1.01 (0.89,1.14)        | 0.91  | 1.03 (0.97,1.08) | 0.34  | 1.03 (0.91,1.16)                     | 0.67  | 1.08 (1.02,1.14) | 0.01  |
| August               | 0.99 (0.87,1.12) | 0.86  | 1.02 (0.96,1.08) | 0.60  | 0.98 (0.85,1.12)        | 0.73  | 1.01 (0.94,1.07) | 0.85  | 0.99 (0.87,1.14)                     | 0.94  | 1.04 (0.98,1.11) | 0.18  |
| September            | 0.99 (0.87,1.13) | 0.87  | 1.02 (0.96,1.08) | 0.61  | 0.98 (0.85,1.13)        | 0.81  | 1 (0.94,1.07)    | 0.99  | 1.01 (0.88,1.16)                     | 0.89  | 1.04 (0.98,1.11) | 0.20  |
| October              | 0.97 (0.84,1.12) | 0.70  | 0.98 (0.92,1.05) | 0.64  | 0.98 (0.84,1.15)        | 0.82  | 0.96 (0.9,1.03)  | 0.26  | 1 (0.86,1.18)                        | 0.97  | 1 (0.94,1.07)    | 0.92  |
| November             | 0.94 (0.82,1.09) | 0.43  | 1 (0.93,1.07)    | 0.94  | 0.94 (0.81,1.1)         | 0.43  | 0.97 (0.9,1.04)  | 0.35  | 0.96 (0.82,1.12)                     | 0.62  | 1.01 (0.94,1.08) | 0.82  |

**Table 7. 30-day Mortality for STEMI and NSTEMI with the interaction of race/ethnicity and hospital COVID-19 burden**

|                                 | Unadjusted        |       |                   |       | Patient Characteristics |       |                   |       | Patient and Hospital Characteristics |       |                   |       |
|---------------------------------|-------------------|-------|-------------------|-------|-------------------------|-------|-------------------|-------|--------------------------------------|-------|-------------------|-------|
|                                 | STEMI             |       | NSTEMI            |       | STEMI                   |       | NSTEMI            |       | STEMI                                |       | NSTEMI            |       |
|                                 | OR (95% CI)       | P     | OR (95% CI)       | P     | OR (95% CI)             | P     | OR (95% CI)       | P     | OR (95% CI)                          | P     | OR (95% CI)       | P     |
| <b>Race</b>                     |                   |       |                   |       |                         |       |                   |       |                                      |       |                   |       |
| White                           | reference         |       |                   |       | reference               |       |                   |       | reference                            |       | reference         |       |
| Black                           | 1.28 (1.23, 1.34) | 0.000 | 0.98 (0.95, 1.01) | 0.14  | 0.94 (0.9, 0.99)        | 0.027 | 0.78 (0.76, 0.81) | 0.000 | 0.92 (0.87, 0.96)                    | 0.001 | 0.77 (0.75, 0.8)  | 0.000 |
| Hispanic                        | 1.24 (1.18, 1.31) | 0.000 | 1.06 (1.02, 1.1)  | 0.004 | 1.13 (1.06, 1.2)        | 0.000 | 1.03 (0.98, 1.08) | 0.31  | 1.06 (1, 1.12)                       | 0.04  | 0.97 (0.94, 1.02) | 0.23  |
| <b>Age</b>                      |                   |       |                   |       |                         |       |                   |       |                                      |       |                   |       |
| 65-69                           | reference         |       |                   |       | reference               |       |                   |       | reference                            |       | reference         |       |
| 70-74                           | 1.16 (1.12, 1.2)  | 0.000 | 0.97 (0.94, 0.99) | 0.02  | 1.24 (1.2, 1.29)        | 0.000 | 1.17 (1.13, 1.2)  | 0.000 | 1.24 (1.2, 1.29)                     | 0.000 | 1.17 (1.13, 1.2)  | 0.000 |
| 75-79                           | 1.52 (1.47, 1.57) | 0.000 | 1.28 (1.25, 1.31) | 0.000 | 1.59 (1.54, 1.65)       | 0.000 | 1.45 (1.42, 1.49) | 0.000 | 1.59 (1.54, 1.65)                    | 0.000 | 1.45 (1.41, 1.49) | 0.000 |
| 80-84                           | 2.13 (2.06, 2.2)  | 0.000 | 1.74 (1.7, 1.79)  | 0.000 | 2.19 (2.11, 2.27)       | 0.000 | 1.9 (1.85, 1.96)  | 0.000 | 2.18 (2.1, 2.26)                     | 0.000 | 1.9 (1.85, 1.95)  | 0.000 |
| 85-89                           | 3.17 (3.06, 3.28) | 0.000 | 2.53 (2.48, 2.59) | 0.000 | 3.18 (3.06, 3.31)       | 0.000 | 2.65 (2.58, 2.72) | 0.000 | 3.18 (3.05, 3.31)                    | 0.000 | 2.64 (2.57, 2.71) | 0.000 |
| 90-94                           | 4.77 (4.59, 4.96) | 0.000 | 3.71 (3.61, 3.81) | 0.000 | 4.84 (4.63, 5.07)       | 0.000 | 3.82 (3.71, 3.94) | 0.000 | 4.84 (4.62, 5.07)                    | 0.000 | 3.79 (3.68, 3.91) | 0.000 |
| 95-                             | 7.29 (6.87, 7.73) | 0.000 | 5.5 (5.31, 5.68)  | 0.000 | 7.51 (7.01, 8.05)       | 0.000 | 5.57 (5.36, 5.79) | 0.000 | 7.47 (6.97, 8)                       | 0.000 | 5.52 (5.31, 5.74) | 0.000 |
| <b>Hospital Covid-19 burden</b> |                   |       |                   |       |                         |       |                   |       |                                      |       |                   |       |
| Before Covid-19                 | reference         |       |                   |       | reference               |       |                   |       | reference                            |       | reference         |       |
| 0.0-2.0%                        | 1 (0.93, 1.07)    | 0.96  | 0.93 (0.89, 0.97) | 0.001 | 0.98 (0.91, 1.05)       | 0.50  | 0.92 (0.88, 0.97) | 0.001 | 0.97 (0.9, 1.05)                     | 0.48  | 0.92 (0.88, 0.97) | 0.001 |
| 2.1-10.0%                       | 1 (0.9, 1.11)     | 0.94  | 0.96 (0.89, 1.03) | 0.242 | 0.96 (0.85, 1.08)       | 0.46  | 0.94 (0.87, 1.02) | 0.12  | 0.95 (0.85, 1.07)                    | 0.44  | 0.95 (0.88, 1.03) | 0.192 |
| 10.1-20.0%                      | 1.15 (1.01, 1.32) | 0.04  | 1.1 (1, 1.2)      | 0.046 | 1.14 (0.98, 1.33)       | 0.09  | 1.07 (0.97, 1.18) | 0.16  | 1.12 (0.96, 1.3)                     | 0.14  | 1.06 (0.96, 1.17) | 0.23  |
| 20.1-30.0%                      | 1 (0.82, 1.23)    | 0.97  | 1.18 (1.02, 1.36) | 0.021 | 0.92 (0.74, 1.15)       | 0.48  | 1.16 (1, 1.35)    | 0.049 | 0.9 (0.72, 1.13)                     | 0.38  | 1.15 (0.99, 1.33) | 0.07  |
| 30.1%-                          | 1.17 (0.91, 1.5)  | 0.22  | 1.51 (1.27, 1.78) | 0.000 | 1.22 (0.94, 1.58)       | 0.144 | 1.53 (1.28, 1.83) | 0.000 | 1.18 (0.9, 1.53)                     | 0.23  | 1.49 (1.25, 1.77) | 0.000 |
| <b>COVID Burden X Race</b>      |                   |       |                   |       |                         |       |                   |       |                                      |       |                   |       |
| 0.0-2.0% X Black                | 1 (0.85, 1.16)    | 0.97  | 1.09 (0.98, 1.2)  | 0.10  | 1.03 (0.87, 1.22)       | 0.72  | 1.08 (0.97, 1.19) | 0.15  | 1.03 (0.87, 1.21)                    | 0.75  | 1.08 (0.97, 1.2)  | 0.14  |
| 2.1-10% X Black                 | 1.1 (0.92, 1.31)  | 0.29  | 1.18 (1.06, 1.32) | 0.004 | 1.05 (0.85, 1.3)        | 0.65  | 1.13 (1, 1.27)    | 0.049 | 1.05 (0.85, 1.3)                     | 0.63  | 1.12 (0.99, 1.26) | 0.06  |
| 10.1-20% X Black                | 0.85 (0.64, 1.14) | 0.29  | 1.29 (1.08, 1.55) | 0.005 | 0.82 (0.59, 1.13)       | 0.22  | 1.23 (1.01, 1.48) | 0.04  | 0.82 (0.59, 1.14)                    | 0.23  | 1.21 (1, 1.46)    | 0.06  |
| 20.1-30% X Black                | 0.99 (0.57, 1.71) | 0.96  | 1.3 (0.96, 1.77)  | 0.09  | 0.8 (0.41, 1.55)        | 0.50  | 1.3 (0.93, 1.8)   | 0.12  | 0.8 (0.41, 1.55)                     | 0.51  | 1.26 (0.91, 1.75) | 0.17  |
| 30.1%- X Black                  | 0.98 (0.46, 2.07) | 0.96  | 0.89 (0.57, 1.4)  | 0.62  | 0.82 (0.35, 1.89)       | 0.64  | 0.79 (0.5, 1.27)  | 0.33  | 0.82 (0.35, 1.91)                    | 0.64  | 0.8 (0.5, 1.27)   | 0.34  |
| 0.0-2.0% X Hispanic             | 0.98 (0.85, 1.13) | 0.80  | 1.05 (0.95, 1.16) | 0.30  | 0.93 (0.79, 1.08)       | 0.34  | 1.04 (0.94, 1.15) | 0.44  | 0.93 (0.8, 1.09)                     | 0.37  | 1.03 (0.93, 1.14) | 0.60  |
| 2.1-10% X Hispanic              | 1.07 (0.9, 1.28)  | 0.45  | 1.17 (1.06, 1.3)  | 0.003 | 0.96 (0.78, 1.17)       | 0.67  | 1.05 (0.94, 1.18) | 0.35  | 0.96 (0.79, 1.18)                    | 0.73  | 1.07 (0.96, 1.19) | 0.25  |
| 10.1-20% X Hispanic             | 0.7 (0.52, 0.94)  | 0.02  | 1.1 (0.92, 1.33)  | 0.30  | 0.62 (0.43, 0.88)       | 0.008 | 1 (0.82, 1.21)    | 0.96  | 0.62 (0.43, 0.89)                    | 0.01  | 1 (0.82, 1.22)    | 0.98  |
| 20.1-30% X Hispanic             | 1.17 (0.75, 1.84) | 0.49  | 1.25 (0.9, 1.73)  | 0.19  | 1.16 (0.7, 1.93)        | 0.56  | 1.04 (0.73, 1.5)  | 0.82  | 1.18 (0.71, 1.95)                    | 0.53  | 1.06 (0.74, 1.52) | 0.76  |
| 30.1%- X Hispanic               | 1.72 (1.12, 2.63) | 0.01  | 1.24 (0.92, 1.65) | 0.15  | 1.36 (0.82, 2.26)       | 0.24  | 1.02 (0.74, 1.4)  | 0.93  | 1.32 (0.79, 2.22)                    | 0.29  | 1.02 (0.74, 1.39) | 0.92  |
| <b>Sex</b>                      |                   |       |                   |       |                         |       |                   |       |                                      |       |                   |       |
| Male                            |                   |       |                   |       | reference               |       |                   |       | reference                            |       | reference         |       |
| Female                          |                   |       |                   |       | 1.17 (1.15, 1.2)        | 0.000 | 0.93 (0.92, 0.95) | 0.000 | 1.17 (1.15, 1.2)                     | 0.000 | 0.93 (0.92, 0.95) | 0.000 |
| <b>Urgency</b>                  |                   |       |                   |       |                         |       |                   |       |                                      |       |                   |       |
| Urgent                          |                   |       |                   |       | 0.91 (0.87, 0.95)       | 0.000 | 0.87 (0.84, 0.9)  | 0.000 | 0.91 (0.88, 0.95)                    | 0.000 | 0.87 (0.84, 0.89) | 0.000 |
| Emergent                        |                   |       |                   |       | reference               |       |                   |       | reference                            |       | reference         |       |

|                                | Unadjusted  |   |             |   | Patient Characteristics |       |                   |       | Patient and Hospital Characteristics |       |                   |       |           |  |
|--------------------------------|-------------|---|-------------|---|-------------------------|-------|-------------------|-------|--------------------------------------|-------|-------------------|-------|-----------|--|
|                                | STEMI       |   | NSTEMI      |   | STEMI                   |       | NSTEMI            |       | STEMI                                |       | NSTEMI            |       |           |  |
|                                | OR (95% CI) | P | OR (95% CI) | P | OR (95% CI)             | P     | OR (95% CI)       | P     | OR (95% CI)                          | P     | OR (95% CI)       | P     |           |  |
| Admission source               |             |   |             |   |                         |       |                   |       |                                      |       |                   |       |           |  |
| Community                      |             |   |             |   | reference               |       |                   |       | reference                            |       |                   |       | reference |  |
| Hospital                       |             |   |             |   | 1.08 (1.03 ,1.13)       | 0.001 | 1.08 (1.04 ,1.12) | 0.000 | 1.1 (1.05 ,1.15)                     | 0.000 | 1.14 (1.1 ,1.18)  | 0.000 |           |  |
| SNF/Nursing Home               |             |   |             |   | 2.13 (1.92 ,2.35)       | 0.000 | 1.81 (1.72 ,1.9)  | 0.000 | 2.15 (1.95 ,2.38)                    | 0.000 | 1.84 (1.75 ,1.94) | 0.000 |           |  |
| Other                          |             |   |             |   | 1.12 (1.02 ,1.22)       | 0.01  | 1.23 (1.15 ,1.31) | 0.000 | 1.12 (1.03 ,1.22)                    | 0.01  | 1.25 (1.18 ,1.33) | 0.000 |           |  |
| Dual-eligible                  |             |   |             |   | 1.05 (1.01 ,1.09)       | 0.000 | 0.92 (0.89 ,0.94) | 0.000 | 1.03 (1 ,1.07)                       | 0.000 | 0.91 (0.89 ,0.93) | 0.000 |           |  |
| Body Mass Index                |             |   |             |   |                         |       |                   |       |                                      |       |                   |       |           |  |
| Underweight                    |             |   |             |   | 1.02 (0.92 ,1.13)       | 0.77  | 1.18 (1.13 ,1.24) | 0.000 | 1.02 (0.92 ,1.13)                    | 0.74  | 1.19 (1.13 ,1.24) | 0.000 |           |  |
| Morbid obesity                 |             |   |             |   | 1.15 (1.07 ,1.23)       | 0.000 | 1 (0.96 ,1.04)    | 0.948 | 1.15 (1.07 ,1.23)                    | 0.000 | 1 (0.96 ,1.04)    | 1.00  |           |  |
| Myocardial infarction location |             |   |             |   |                         |       |                   |       |                                      |       |                   |       |           |  |
| Inferior wall                  |             |   |             |   | reference               |       | NA                |       | reference                            |       | NA                |       |           |  |
| Anterior wall                  |             |   |             |   | 1.38 (1.35 ,1.42)       | 0.000 | NA                |       | 1.38 (1.35 ,1.42)                    | 0.000 | NA                |       |           |  |
| Lateral wall                   |             |   |             |   | 1.4 (1.34 ,1.47)        | 0.000 | NA                |       | 1.4 (1.34 ,1.46)                     | 0.000 | NA                |       |           |  |
| Unspecified                    |             |   |             |   | 1.93 (1.87 ,1.99)       | 0.000 | NA                |       | 1.9 (1.84 ,1.96)                     | 0.000 | NA                |       |           |  |
| Congestive heart failure       |             |   |             |   |                         |       |                   |       |                                      |       |                   |       |           |  |
| Systolic                       |             |   |             |   | 1.29 (1.24 ,1.33)       | 0.000 | 2.32 (2.27 ,2.37) | 0.000 | 1.29 (1.24 ,1.34)                    | 0.000 | 2.34 (2.28 ,2.39) | 0.000 |           |  |
| Diastolic                      |             |   |             |   | 0.88 (0.83 ,0.93)       | 0.000 | 1.42 (1.38 ,1.46) | 0.000 | 0.88 (0.84 ,0.94)                    | 0.000 | 1.43 (1.4 ,1.47)  | 0.000 |           |  |
| Systolic & Diastolic           |             |   |             |   | 1.15 (1.08 ,1.22)       | 0.000 | 2.11 (2.04 ,2.17) | 0.000 | 1.15 (1.08 ,1.22)                    | 0.000 | 2.12 (2.06 ,2.19) | 0.000 |           |  |
| Unspecified                    |             |   |             |   | 2.32 (2.21 ,2.44)       | 0.000 | 2.54 (2.47 ,2.62) | 0.000 | 2.3 (2.19 ,2.42)                     | 0.000 | 2.5 (2.43 ,2.58)  | 0.000 |           |  |
| Right heart failure            |             |   |             |   | 4.23 (3.47 ,5.15)       | 0.000 | 3.1 (2.64 ,3.64)  | 0.000 | 4.24 (3.48 ,5.17)                    | 0.000 | 3.12 (2.65 ,3.66) | 0.000 |           |  |
| Biventricular heart failure    |             |   |             |   | 4.2 (3.34 ,5.27)        | 0.000 | 2.34 (2.01 ,2.73) | 0.000 | 4.25 (3.39 ,5.33)                    | 0.000 | 2.4 (2.06 ,2.78)  | 0.000 |           |  |
| End-stage heart failure        |             |   |             |   | 2.74 (1.89 ,3.98)       | 0.000 | 2.91 (2.5 ,3.38)  | 0.000 | 2.73 (1.89 ,3.96)                    | 0.000 | 2.91 (2.5 ,3.38)  | 0.000 |           |  |
| Complications of AMI           |             |   |             |   |                         |       |                   |       |                                      |       |                   |       |           |  |
| Ventricular septal defect      |             |   |             |   | 20.7 (16.3 ,26.3)       | 0.000 | 24.3 (14.2 ,41.8) | 0.000 | 20.9 (16.4 ,26.5)                    | 0.000 | 24.9 (14.5 ,42.7) | 0.000 |           |  |
| LV rupture                     |             |   |             |   | 34.8 (25.2 ,48)         | 0.000 | 42.1 (22.4 ,79.1) | 0.000 | 35.2 (25.5 ,48.6)                    | 0.000 | 42.1 (22.4 ,79.1) | 0.000 |           |  |
| Papillary muscle rupture       |             |   |             |   | 10.6 (7.2 ,15.7)        | 0.000 | 7.5 (4.5 ,12.5)   | 0.000 | 10.7 (7.3 ,15.8)                     | 0.000 | 7.9 (4.7 ,13)     | 0.000 |           |  |
| Prior procedures               |             |   |             |   |                         |       |                   |       |                                      |       |                   |       |           |  |
| PCI                            |             |   |             |   | 0.82 (0.8 ,0.85)        | 0.000 | 0.73 (0.72 ,0.75) | 0.000 | 0.82 (0.8 ,0.85)                     | 0.000 | 0.74 (0.72 ,0.75) | 0.000 |           |  |
| CABG                           |             |   |             |   | 1.15 (1.1 ,1.2)         | 0.000 | 0.99 (0.97 ,1.01) | 0.46  | 1.15 (1.1 ,1.2)                      | 0.000 | 0.99 (0.97 ,1.01) | 0.33  |           |  |
| Heart valve surgery            |             |   |             |   | 1.37 (1.25 ,1.51)       | 0.000 | 1.02 (0.98 ,1.07) | 0.27  | 1.38 (1.25 ,1.51)                    | 0.000 | 1.03 (0.99 ,1.08) | 0.12  |           |  |
| Dialysis                       |             |   |             |   | 2.59 (2.38 ,2.83)       | 0.000 | 2.12 (2.04 ,2.2)  | 0.000 | 2.59 (2.37 ,2.82)                    | 0.000 | 2.12 (2.04 ,2.2)  | 0.000 |           |  |
| AICD                           |             |   |             |   | 0.99 (0.88 ,1.1)        | 0.82  | 0.81 (0.78 ,0.85) | 0.000 | 0.99 (0.88 ,1.1)                     | 0.81  | 0.81 (0.78 ,0.85) | 0.000 |           |  |
| COVID                          |             |   |             |   | 2.64 (2.08 ,3.35)       | 0.000 | 2.16 (1.81 ,2.59) | 0.000 | 2.65 (2.08 ,3.36)                    | 0.000 | 2.16 (1.8 ,2.58)  | 0.000 |           |  |
| Functional Status              |             |   |             |   |                         |       |                   |       |                                      |       |                   |       |           |  |
| Wheel-chair                    |             |   |             |   | 1.34 (1.12 ,1.6)        | 0.001 | 1.25 (1.16 ,1.36) | 0.000 | 1.35 (1.13 ,1.61)                    | 0.001 | 1.27 (1.17 ,1.38) | 0.000 |           |  |
| Supplemental oxygen            |             |   |             |   | 1.4 (1.29 ,1.52)        | 0.000 | 1.38 (1.34 ,1.43) | 0.000 | 1.4 (1.29 ,1.51)                     | 0.000 | 1.38 (1.33 ,1.43) | 0.000 |           |  |
| Dependent on provider          |             |   |             |   | 2.15 (1.81 ,2.55)       | 0.000 | 2.19 (2.02 ,2.37) | 0.000 | 2.12 (1.78 ,2.51)                    | 0.000 | 2.14 (1.98 ,2.31) | 0.000 |           |  |
| Elixhauser comorbidities       |             |   |             |   |                         |       |                   |       |                                      |       |                   |       |           |  |
| Cardiac arrhythmias            |             |   |             |   | 1.57 (1.54 ,1.61)       | 0.000 | 1.17 (1.16 ,1.19) | 0.000 | 1.58 (1.54 ,1.61)                    | 0.000 | 1.18 (1.16 ,1.2)  | 0.000 |           |  |
| Valvular heart disease         |             |   |             |   | 0.93 (0.9 ,0.97)        | 0.000 | 1.06 (1.04 ,1.08) | 0.000 | 0.94 (0.91 ,0.97)                    | 0.000 | 1.07 (1.05 ,1.09) | 0.000 |           |  |
| Peripheral vascular disorder   |             |   |             |   | 1.16 (1.1 ,1.23)        | 0.000 | 1.12 (1.09 ,1.14) | 0.000 | 1.16 (1.1 ,1.22)                     | 0.000 | 1.12 (1.09 ,1.15) | 0.000 |           |  |
| Peripheral vascular disorder   |             |   |             |   | 1.34 (1.3 ,1.4)         | 0.000 | 1.16 (1.14 ,1.19) | 0.000 | 1.35 (1.3 ,1.4)                      | 0.000 | 1.17 (1.15 ,1.2)  | 0.000 |           |  |

|                                       | Unadjusted  |   |             |   | Patient Characteristics |       |                   |       | Patient and Hospital Characteristics |       |                   |       |
|---------------------------------------|-------------|---|-------------|---|-------------------------|-------|-------------------|-------|--------------------------------------|-------|-------------------|-------|
|                                       | STEMI       |   | NSTEMI      |   | STEMI                   |       | NSTEMI            |       | STEMI                                |       | NSTEMI            |       |
|                                       | OR (95% CI) | P | OR (95% CI) | P | OR (95% CI)             | P     | OR (95% CI)       | P     | OR (95% CI)                          | P     | OR (95% CI)       | P     |
| Hypertension, uncomplicated           |             |   |             |   | 0.66 (0.64 ,0.68)       | 0.000 | 0.66 (0.64 ,0.68) | 0.000 | 0.66 (0.64 ,0.68)                    | 0.000 | 0.66 (0.65 ,0.68) | 0.000 |
| Hypertension, complicated             |             |   |             |   | 0.67 (0.64 ,0.69)       | 0.000 | 0.69 (0.67 ,0.71) | 0.000 | 0.67 (0.64 ,0.69)                    | 0.000 | 0.69 (0.67 ,0.71) | 0.000 |
| Paralysis                             |             |   |             |   | 1.59 (1.37 ,1.84)       | 0.000 | 1.63 (1.49 ,1.78) | 0.000 | 1.58 (1.37 ,1.83)                    | 0.000 | 1.63 (1.49 ,1.79) | 0.000 |
| Neurologic disorder, other            |             |   |             |   | 3.43 (3.3 ,3.56)        | 0.000 | 2.22 (2.18 ,2.28) | 0.000 | 3.44 (3.31 ,3.57)                    | 0.000 | 2.23 (2.18 ,2.28) | 0.000 |
| Chronic pulmonary disease             |             |   |             |   | 1.12 (1.09 ,1.15)       | 0.000 | 1.11 (1.09 ,1.12) | 0.000 | 1.12 (1.08 ,1.15)                    | 0.000 | 1.1 (1.08 ,1.12)  | 0.000 |
| Diabetes, uncomplicated               |             |   |             |   | 1.21 (1.17 ,1.25)       | 0.000 | 1.07 (1.05 ,1.09) | 0.000 | 1.21 (1.17 ,1.24)                    | 0.000 | 1.06 (1.04 ,1.09) | 0.000 |
| Diabetes, complicated                 |             |   |             |   | 1.29 (1.25 ,1.33)       | 0.000 | 1.11 (1.09 ,1.13) | 0.000 | 1.29 (1.25 ,1.33)                    | 0.000 | 1.11 (1.09 ,1.14) | 0.000 |
| Hypothyroidism                        |             |   |             |   | 0.85 (0.82 ,0.87)       | 0.000 | 0.88 (0.87 ,0.9)  | 0.000 | 0.85 (0.82 ,0.87)                    | 0.000 | 0.88 (0.87 ,0.9)  | 0.000 |
| Renal failure                         |             |   |             |   | 1.25 (1.2 ,1.29)        | 0.000 | 1.37 (1.34 ,1.4)  | 0.000 | 1.25 (1.21 ,1.3)                     | 0.000 | 1.37 (1.35 ,1.4)  | 0.000 |
| Liver disease                         |             |   |             |   | 2.67 (2.54 ,2.82)       | 0.000 | 2.32 (2.24 ,2.4)  | 0.000 | 2.68 (2.55 ,2.83)                    | 0.000 | 2.34 (2.25 ,2.42) | 0.000 |
| Peptic ulcer disease                  |             |   |             |   | 0.8 (0.67 ,0.95)        | 0.009 | 0.85 (0.78 ,0.92) | 0.000 | 0.8 (0.67 ,0.95)                     | 0.01  | 0.86 (0.79 ,0.93) | 0.000 |
| AIDS/HIV                              |             |   |             |   | 1.1 (0.7 ,1.7)          | 0.69  | 1.19 (0.91 ,1.55) | 0.21  | 1.1 (0.7 ,1.71)                      | 0.687 | 1.23 (0.94 ,1.61) | 0.13  |
| Lymphoma                              |             |   |             |   | 1.33 (1.16 ,1.53)       | 0.000 | 1.25 (1.16 ,1.34) | 0.000 | 1.34 (1.16 ,1.54)                    | 0.000 | 1.26 (1.18 ,1.36) | 0.000 |
| Metastatic cancer                     |             |   |             |   | 2.56 (2.32 ,2.83)       | 0.000 | 2.96 (2.81 ,3.11) | 0.000 | 2.57 (2.32 ,2.83)                    | 0.000 | 2.97 (2.82 ,3.13) | 0.000 |
| Solid tumor                           |             |   |             |   | 1.58 (1.49 ,1.69)       | 0.000 | 1.56 (1.51 ,1.63) | 0.000 | 1.59 (1.49 ,1.69)                    | 0.000 | 1.57 (1.51 ,1.63) | 0.000 |
| Rheumatoid arthritis                  |             |   |             |   | 0.93 (0.87 ,1)          | 0.048 | 0.98 (0.95 ,1.02) | 0.41  | 0.94 (0.88 ,1)                       | 0.06  | 0.99 (0.95 ,1.03) | 0.62  |
| Coagulopathy                          |             |   |             |   | 1.4 (1.33 ,1.48)        | 0.000 | 1.3 (1.26 ,1.33)  | 0.000 | 1.41 (1.33 ,1.48)                    | 0.000 | 1.3 (1.26 ,1.34)  | 0.000 |
| Weight loss                           |             |   |             |   | 1.35 (1.26 ,1.45)       | 0.000 | 1.88 (1.81 ,1.94) | 0.000 | 1.35 (1.26 ,1.45)                    | 0.000 | 1.88 (1.82 ,1.95) | 0.000 |
| Fluid and electrolyte disorder        |             |   |             |   | 2.62 (2.54 ,2.69)       | 0.000 | 1.94 (1.91 ,1.97) | 0.000 | 2.61 (2.54 ,2.69)                    | 0.000 | 1.94 (1.91 ,1.97) | 0.000 |
| Anemia, blood loss                    |             |   |             |   | 0.83 (0.71 ,0.98)       | 0.03  | 0.91 (0.84 ,0.99) | 0.02  | 0.83 (0.7 ,0.97)                     | 0.019 | 0.91 (0.84 ,0.99) | 0.02  |
| Anemia, deficiency                    |             |   |             |   | 0.73 (0.68 ,0.79)       | 0.000 | 0.85 (0.82 ,0.88) | 0.000 | 0.73 (0.68 ,0.79)                    | 0.000 | 0.86 (0.83 ,0.89) | 0.000 |
| Alcohol abuse                         |             |   |             |   | 0.99 (0.91 ,1.07)       | 0.81  | 0.85 (0.8 ,0.89)  | 0.000 | 0.99 (0.91 ,1.07)                    | 0.78  | 0.85 (0.8 ,0.89)  | 0.000 |
| Drug abuse                            |             |   |             |   | 0.74 (0.66 ,0.84)       | 0.000 | 0.77 (0.72 ,0.84) | 0.000 | 0.74 (0.66 ,0.84)                    | 0.000 | 0.78 (0.72 ,0.84) | 0.000 |
| Psychoses                             |             |   |             |   | 1.32 (1.12 ,1.56)       | 0.001 | 1.09 (0.99 ,1.2)  | 0.07  | 1.32 (1.12 ,1.56)                    | 0.001 | 1.09 (0.99 ,1.2)  | 0.07  |
| Depression                            |             |   |             |   | 0.86 (0.82 ,0.89)       | 0.000 | 0.93 (0.91 ,0.95) | 0.000 | 0.86 (0.82 ,0.9)                     | 0.000 | 0.94 (0.91 ,0.96) | 0.000 |
| Volume of AMI hospitalizations        |             |   |             |   |                         |       |                   |       |                                      |       |                   |       |
| <200                                  |             |   |             |   |                         |       |                   |       | reference                            |       | reference         |       |
| 200-499                               |             |   |             |   |                         |       |                   |       | 0.83 (0.78 ,0.89)                    | 0.000 | 0.92 (0.89 ,0.96) | 0.000 |
| 500-999                               |             |   |             |   |                         |       |                   |       | 0.85 (0.79 ,0.9)                     | 0.000 | 0.91 (0.88 ,0.95) | 0.000 |
| 1000-1999                             |             |   |             |   |                         |       |                   |       | 0.84 (0.79 ,0.9)                     | 0.000 | 0.88 (0.84 ,0.92) | 0.000 |
| 2000-                                 |             |   |             |   |                         |       |                   |       | 0.8 (0.73 ,0.87)                     | 0.000 | 0.82 (0.77 ,0.88) | 0.000 |
| Proportion of minority patients (AMI) |             |   |             |   |                         |       |                   |       |                                      |       |                   |       |
| <5%                                   |             |   |             |   |                         |       |                   |       | reference                            |       | reference         |       |
| 5.0-9.9%                              |             |   |             |   |                         |       |                   |       | 1 (0.95 ,1.05)                       | 0.984 | 1 (0.97 ,1.04)    | 0.965 |
| 10.0-24.9                             |             |   |             |   |                         |       |                   |       | 1.07 (1.03 ,1.11)                    | 0.001 | 1.05 (1.02 ,1.09) | 0.003 |
| 25.0-49.9%                            |             |   |             |   |                         |       |                   |       | 1.04 (0.99 ,1.1)                     | 0.10  | 1.05 (1.01 ,1.09) | 0.024 |
| 50.0%-                                |             |   |             |   |                         |       |                   |       | 1.21 (1.1 ,1.32)                     | 0.000 | 1.24 (1.15 ,1.32) | 0.000 |



|                                         | Unadjusted        |       |                   |       | Patient Characteristics |       |                   |       | Patient and Hospital Characteristics |       |                   |       |
|-----------------------------------------|-------------------|-------|-------------------|-------|-------------------------|-------|-------------------|-------|--------------------------------------|-------|-------------------|-------|
|                                         | STEMI             |       | NSTEMI            |       | STEMI                   |       | NSTEMI            |       | STEMI                                |       | NSTEMI            |       |
|                                         | OR (95% CI)       | P     | OR (95% CI)       | P     | OR (95% CI)             | P     | OR (95% CI)       | P     | OR (95% CI)                          | P     | OR (95% CI)       | P     |
| Disproportionate share percentage (DSH) |                   |       |                   |       |                         |       |                   |       |                                      |       |                   |       |
| 0-9.9%                                  |                   |       |                   |       |                         |       |                   |       | reference                            |       | reference         |       |
| 10.0-24.9%                              |                   |       |                   |       |                         |       |                   |       | 1.03 (0.96 ,1.11)                    | 0.37  | 1.03 (0.97 ,1.09) | 0.41  |
| 25.0-49.9%                              |                   |       |                   |       |                         |       |                   |       | 1.1 (1.02 ,1.18)                     | 0.02  | 1.07 (1 ,1.14)    | 0.04  |
| 50.0%-                                  |                   |       |                   |       |                         |       |                   |       | 1.08 (0.98 ,1.19)                    | 0.12  | 0.98 (0.9 ,1.06)  | 0.57  |
| Resident-to-bed ratio                   |                   |       |                   |       |                         |       |                   |       |                                      |       |                   |       |
| 0                                       |                   |       |                   |       |                         |       |                   |       | reference                            |       | reference         |       |
| >0-0.10                                 |                   |       |                   |       |                         |       |                   |       | 0.96 (0.92 ,1)                       | 0.04  | 0.97 (0.95 ,1)    | 0.09  |
| 0.11-0.20                               |                   |       |                   |       |                         |       |                   |       | 0.96 (0.92 ,1.02)                    | 0.17  | 0.97 (0.94 ,1.01) | 0.17  |
| 0.21-0.40                               |                   |       |                   |       |                         |       |                   |       | 0.95 (0.91 ,1)                       | 0.07  | 0.9 (0.86 ,0.94)  | 0.000 |
| 0.41-                                   |                   |       |                   |       |                         |       |                   |       | 0.97 (0.92 ,1.03)                    | 0.33  | 0.85 (0.8 ,0.89)  | 0.000 |
| Rurality                                |                   |       |                   |       |                         |       |                   |       |                                      |       |                   |       |
| Rural hospital                          |                   |       |                   |       |                         |       |                   |       | reference                            |       | reference         |       |
| Large urban hospital                    |                   |       |                   |       |                         |       |                   |       | 0.89 (0.84 ,0.95)                    | 0.000 | 0.84 (0.8 ,0.88)  | 0.000 |
| Other urban hospital                    |                   |       |                   |       |                         |       |                   |       | 0.97 (0.91 ,1.02)                    | 0.25  | 0.91 (0.87 ,0.96) | 0.000 |
| Time                                    | 1 (1 ,1)          | 0.008 | 1 (1 ,1)          | 0.000 | 1 (1 ,1)                | 0.000 | 1 (1 ,1)          | 0.000 | 1 (1 ,1)                             | 0.000 | 1 (1 ,1)          | 0.000 |
| Admission month                         |                   |       |                   |       |                         |       |                   |       |                                      |       |                   |       |
| January                                 | reference         |       |                   |       | reference               |       |                   |       | reference                            |       | reference         |       |
| February                                | 1.04 (0.99 ,1.09) | 0.12  | 1.01 (0.97 ,1.04) | 0.75  | 1.03 (0.97 ,1.08)       | 0.31  | 1.02 (0.99 ,1.05) | 0.23  | 1.03 (0.97 ,1.08)                    | 0.31  | 1.02 (0.99 ,1.05) | 0.20  |
| March                                   | 0.98 (0.93 ,1.03) | 0.38  | 0.98 (0.94 ,1.01) | 0.17  | 0.96 (0.91 ,1.02)       | 0.21  | 0.99 (0.95 ,1.02) | 0.51  | 0.96 (0.91 ,1.02)                    | 0.20  | 0.99 (0.96 ,1.03) | 0.60  |
| April                                   | 0.98 (0.93 ,1.03) | 0.50  | 0.95 (0.92 ,0.98) | 0.002 | 0.98 (0.93 ,1.04)       | 0.58  | 0.97 (0.93 ,1)    | 0.07  | 0.98 (0.93 ,1.04)                    | 0.57  | 0.97 (0.94 ,1.01) | 0.10  |
| May                                     | 0.98 (0.93 ,1.03) | 0.44  | 0.92 (0.89 ,0.96) | 0.000 | 0.96 (0.9 ,1.02)        | 0.15  | 0.94 (0.91 ,0.97) | 0.001 | 0.96 (0.9 ,1.01)                     | 0.14  | 0.94 (0.91 ,0.98) | 0.001 |
| June                                    | 0.99 (0.94 ,1.05) | 0.77  | 0.91 (0.88 ,0.94) | 0.000 | 0.99 (0.93 ,1.05)       | 0.69  | 0.93 (0.9 ,0.97)  | 0.000 | 0.99 (0.93 ,1.05)                    | 0.70  | 0.93 (0.9 ,0.97)  | 0.000 |
| July                                    | 0.97 (0.92 ,1.02) | 0.30  | 0.89 (0.86 ,0.92) | 0.000 | 0.95 (0.9 ,1.01)        | 0.10  | 0.91 (0.88 ,0.95) | 0.000 | 0.95 (0.9 ,1.01)                     | 0.10  | 0.91 (0.88 ,0.95) | 0.000 |
| August                                  | 0.96 (0.91 ,1.01) | 0.11  | 0.92 (0.89 ,0.95) | 0.000 | 0.94 (0.89 ,1)          | 0.04  | 0.94 (0.9 ,0.97)  | 0.000 | 0.94 (0.89 ,1)                       | 0.04  | 0.94 (0.91 ,0.97) | 0.001 |
| September                               | 0.99 (0.94 ,1.04) | 0.65  | 0.93 (0.9 ,0.96)  | 0.000 | 0.97 (0.92 ,1.03)       | 0.35  | 0.95 (0.92 ,0.98) | 0.005 | 0.97 (0.92 ,1.03)                    | 0.36  | 0.95 (0.92 ,0.99) | 0.009 |
| October                                 | 1.01 (0.96 ,1.07) | 0.63  | 0.99 (0.95 ,1.02) | 0.44  | 1.01 (0.95 ,1.07)       | 0.71  | 1.01 (0.98 ,1.05) | 0.56  | 1.01 (0.96 ,1.07)                    | 0.69  | 1.01 (0.98 ,1.05) | 0.47  |
| November                                | 1.05 (0.99 ,1.1)  | 0.09  | 1.01 (0.97 ,1.04) | 0.70  | 1.02 (0.97 ,1.08)       | 0.40  | 1.03 (0.99 ,1.06) | 0.15  | 1.03 (0.97 ,1.08)                    | 0.38  | 1.03 (0.99 ,1.07) | 0.12  |
| December                                | 1.11 (1.05 ,1.17) | 0.000 | 1.02 (0.99 ,1.06) | 0.21  | 1.15 (1.08 ,1.22)       | 0.000 | 1.09 (1.05 ,1.13) | 0.000 | 1.15 (1.08 ,1.22)                    | 0.000 | 1.09 (1.05 ,1.13) | 0.000 |
| COVID-19 month                          |                   |       |                   |       |                         |       |                   |       |                                      |       |                   |       |
| March                                   | reference         |       |                   |       | reference               |       |                   |       | reference                            |       | reference         |       |
| April                                   | 1.15 (1.03 ,1.29) | 0.01  | 1.2 (1.11 ,1.3)   | 0.000 | 1.2 (1.06 ,1.35)        | 0.005 | 1.25 (1.15 ,1.35) | 0.000 | 1.2 (1.06 ,1.35)                     | 0.005 | 1.24 (1.15 ,1.35) | 0.000 |
| May                                     | 1.03 (0.9 ,1.18)  | 0.68  | 1.11 (1.01 ,1.22) | 0.026 | 1.04 (0.89 ,1.21)       | 0.61  | 1.12 (1.02 ,1.24) | 0.02  | 1.05 (0.9 ,1.22)                     | 0.558 | 1.12 (1.02 ,1.24) | 0.02  |
| June                                    | 1.03 (0.9 ,1.16)  | 0.70  | 1.12 (1.03 ,1.21) | 0.008 | 1.02 (0.89 ,1.17)       | 0.77  | 1.11 (1.02 ,1.21) | 0.02  | 1.02 (0.89 ,1.18)                    | 0.73  | 1.11 (1.02 ,1.21) | 0.02  |
| July                                    | 1.07 (0.95 ,1.2)  | 0.26  | 1.13 (1.04 ,1.22) | 0.004 | 1.03 (0.9 ,1.17)        | 0.66  | 1.16 (1.07 ,1.27) | 0.001 | 1.03 (0.91 ,1.17)                    | 0.64  | 1.16 (1.06 ,1.26) | 0.001 |
| August                                  | 1.06 (0.93 ,1.2)  | 0.38  | 1.16 (1.06 ,1.27) | 0.001 | 1.1 (0.95 ,1.27)        | 0.20  | 1.15 (1.05 ,1.27) | 0.003 | 1.1 (0.96 ,1.28)                     | 0.17  | 1.15 (1.05 ,1.27) | 0.003 |
| September                               | 1.05 (0.92 ,1.2)  | 0.49  | 1.15 (1.05 ,1.26) | 0.002 | 1.06 (0.91 ,1.23)       | 0.46  | 1.15 (1.05 ,1.27) | 0.004 | 1.06 (0.91 ,1.23)                    | 0.44  | 1.15 (1.04 ,1.26) | 0.007 |
| October                                 | 1.02 (0.88 ,1.18) | 0.79  | 1.11 (1.01 ,1.21) | 0.04  | 0.97 (0.82 ,1.14)       | 0.69  | 1.13 (1.02 ,1.25) | 0.02  | 0.97 (0.82 ,1.14)                    | 0.70  | 1.12 (1.02 ,1.24) | 0.02  |
| November                                | 1.12 (0.97 ,1.29) | 0.12  | 1.05 (0.95 ,1.16) | 0.34  | 1.08 (0.93 ,1.27)       | 0.32  | 1.06 (0.96 ,1.18) | 0.25  | 1.09 (0.93 ,1.27)                    | 0.30  | 1.06 (0.96 ,1.18) | 0.24  |

**Table 8. 30-day Readmissions for STEMI and NSTEMI with the interaction of race/ethnicity and hospital COVID-19 burden.**

|                                 | Unadjusted        |       |                   |       | Patient Characteristics |       |                   |       | Patient and Hospital Characteristics |       |                   |       |
|---------------------------------|-------------------|-------|-------------------|-------|-------------------------|-------|-------------------|-------|--------------------------------------|-------|-------------------|-------|
|                                 | STEMI             |       | NSTEMI            |       | STEMI                   |       | NSTEMI            |       | STEMI                                |       | NSTEMI            |       |
|                                 | OR (95% CI)       | P     | OR (95% CI)       | P     | OR (95% CI)             | P     | OR (95% CI)       | P     | OR (95% CI)                          | P     | OR (95% CI)       | P     |
| <b>Race</b>                     |                   |       |                   |       |                         |       |                   |       |                                      |       |                   |       |
| White                           | reference         |       |                   |       | reference               |       |                   |       | reference                            |       | reference         |       |
| Black                           | 1.28 (1.23 ,1.34) | 0.000 | 1.15 (1.11 ,1.19) | 0.000 | 1.06 (1.01 ,1.11)       | 0.01  | 0.98 (0.95 ,1.01) | 0.16  | 1.03 (0.98 ,1.07)                    | 0.27  | 0.93 (0.91 ,0.95) | 0.000 |
| Hispanic                        | 1.21 (1.15 ,1.28) | 0.000 | 1.13 (1.07 ,1.19) | 0.000 | 1.05 (1 ,1.11)          | 0.06  | 1 (0.96 ,1.05)    | 0.86  | 0.98 (0.94 ,1.03)                    | 0.52  | 0.94 (0.91 ,0.98) | 0.001 |
| <b>Age</b>                      |                   |       |                   |       |                         |       |                   |       |                                      |       |                   |       |
| 65-69                           | reference         |       |                   |       | reference               |       |                   |       | reference                            |       | reference         |       |
| 70-74                           | 1.08 (1.05 ,1.11) | 0.000 | 0.97 (0.96 ,0.99) | 0.00  | 1.1 (1.07 ,1.13)        | 0.000 | 1.06 (1.04 ,1.07) | 0.000 | 1.1 (1.06 ,1.13)                     | 0.000 | 1.05 (1.03 ,1.07) | 0.000 |
| 75-79                           | 1.24 (1.21 ,1.28) | 0.000 | 1.05 (1.04 ,1.07) | 0.000 | 1.22 (1.18 ,1.25)       | 0.000 | 1.12 (1.1 ,1.14)  | 0.000 | 1.21 (1.18 ,1.25)                    | 0.000 | 1.11 (1.09 ,1.13) | 0.000 |
| 80-84                           | 1.33 (1.29 ,1.38) | 0.000 | 1.06 (1.04 ,1.08) | 0.000 | 1.26 (1.21 ,1.3)        | 0.000 | 1.11 (1.09 ,1.13) | 0.000 | 1.25 (1.21 ,1.29)                    | 0.000 | 1.08 (1.06 ,1.1)  | 0.000 |
| 85-89                           | 1.33 (1.28 ,1.38) | 0.000 | 1.01 (0.99 ,1.03) | 0.51  | 1.21 (1.16 ,1.26)       | 0.000 | 1.04 (1.02 ,1.06) | 0.000 | 1.19 (1.14 ,1.24)                    | 0.000 | 0.98 (0.96 ,1)    | 0.09  |
| 90-94                           | 1.23 (1.18 ,1.3)  | 0.000 | 0.84 (0.82 ,0.86) | 0.000 | 1.09 (1.04 ,1.15)       | 0.001 | 0.85 (0.83 ,0.88) | 0.000 | 1.06 (1 ,1.11)                       | 0.03  | 0.78 (0.76 ,0.8)  | 0.000 |
| 95-                             | 0.88 (0.81 ,0.95) | 0.002 | 0.64 (0.61 ,0.67) | 0.000 | 0.76 (0.7 ,0.83)        | 0.000 | 0.65 (0.62 ,0.68) | 0.000 | 0.72 (0.66 ,0.79)                    | 0.000 | 0.57 (0.54 ,0.6)  | 0.000 |
| <b>Hospital Covid-19 burden</b> |                   |       |                   |       |                         |       |                   |       |                                      |       |                   |       |
| Before Covid-19                 | reference         |       |                   |       | reference               |       |                   |       | reference                            |       | reference         |       |
| 0.0-2.0%                        | 0.98 (0.92 ,1.05) | 0.61  | 0.99 (0.96 ,1.02) | 0.50  | 0.98 (0.92 ,1.06)       | 0.66  | 0.98 (0.95 ,1.02) | 0.36  | 0.98 (0.91 ,1.05)                    | 0.51  | 0.98 (0.95 ,1.02) | 0.28  |
| 2.1-10.0%                       | 1.04 (0.94 ,1.16) | 0.47  | 0.95 (0.89 ,1.01) | 0.08  | 1.02 (0.92 ,1.14)       | 0.67  | 0.93 (0.87 ,0.98) | 0.01  | 1.02 (0.92 ,1.14)                    | 0.71  | 0.97 (0.92 ,1.02) | 0.26  |
| 10.1-20.0%                      | 1.15 (0.99 ,1.32) | 0.06  | 1.01 (0.94 ,1.1)  | 0.71  | 1.14 (0.99 ,1.32)       | 0.07  | 0.98 (0.91 ,1.06) | 0.65  | 1.11 (0.96 ,1.28)                    | 0.16  | 0.97 (0.91 ,1.05) | 0.49  |
| 20.1-30.0%                      | 1.09 (0.89 ,1.34) | 0.42  | 1.01 (0.9 ,1.13)  | 0.83  | 1.08 (0.88 ,1.32)       | 0.49  | 0.98 (0.87 ,1.09) | 0.68  | 1.01 (0.82 ,1.24)                    | 0.95  | 0.94 (0.84 ,1.04) | 0.23  |
| 30.1%-                          | 1.04 (0.78 ,1.4)  | 0.77  | 1.16 (1.01 ,1.35) | 0.04  | 1.04 (0.78 ,1.39)       | 0.79  | 1.12 (0.97 ,1.3)  | 0.13  | 0.96 (0.71 ,1.28)                    | 0.77  | 0.98 (0.85 ,1.13) | 0.73  |
| <b>COVID Burden X Race</b>      |                   |       |                   |       |                         |       |                   |       |                                      |       |                   |       |
| 0.0-2.0% X Black                | 1.02 (0.88 ,1.18) | 0.78  | 0.97 (0.91 ,1.04) | 0.35  | 1.02 (0.88 ,1.18)       | 0.79  | 0.96 (0.9 ,1.03)  | 0.25  | 1.02 (0.88 ,1.19)                    | 0.76  | 0.98 (0.91 ,1.05) | 0.54  |
| 2.1-10% X Black                 | 1.11 (0.94 ,1.32) | 0.22  | 1.01 (0.94 ,1.09) | 0.81  | 1.08 (0.91 ,1.3)        | 0.37  | 1 (0.93 ,1.08)    | 0.95  | 1.09 (0.91 ,1.31)                    | 0.34  | 1.01 (0.94 ,1.1)  | 0.76  |
| 10.1-20% X Black                | 0.95 (0.72 ,1.25) | 0.71  | 0.96 (0.84 ,1.09) | 0.51  | 0.91 (0.69 ,1.2)        | 0.52  | 0.96 (0.84 ,1.09) | 0.53  | 0.9 (0.68 ,1.19)                     | 0.46  | 0.96 (0.84 ,1.1)  | 0.57  |
| 20.1-30% X Black                | 1.14 (0.67 ,1.94) | 0.64  | 1.14 (0.9 ,1.44)  | 0.27  | 1.07 (0.61 ,1.85)       | 0.82  | 1.17 (0.92 ,1.49) | 0.19  | 1.06 (0.61 ,1.85)                    | 0.83  | 1.16 (0.9 ,1.49)  | 0.25  |
| 30.1%- X Black                  | 1.21 (0.58 ,2.54) | 0.61  | 0.97 (0.69 ,1.38) | 0.89  | 1.19 (0.55 ,2.55)       | 0.66  | 0.97 (0.69 ,1.37) | 0.85  | 1.29 (0.6 ,2.79)                     | 0.52  | 1 (0.7 ,1.43)     | 1.00  |
| 0.0-2.0% X Hispanic             | 0.93 (0.81 ,1.07) | 0.30  | 0.99 (0.92 ,1.06) | 0.70  | 0.91 (0.79 ,1.05)       | 0.22  | 0.99 (0.93 ,1.06) | 0.81  | 0.92 (0.8 ,1.07)                     | 0.29  | 0.98 (0.92 ,1.05) | 0.61  |
| 2.1-10% X Hispanic              | 1.04 (0.86 ,1.26) | 0.68  | 1.02 (0.93 ,1.12) | 0.60  | 1.04 (0.85 ,1.26)       | 0.71  | 1.01 (0.93 ,1.11) | 0.79  | 1.06 (0.87 ,1.29)                    | 0.54  | 1.03 (0.94 ,1.13) | 0.49  |
| 10.1-20% X Hispanic             | 0.94 (0.71 ,1.24) | 0.67  | 0.91 (0.79 ,1.05) | 0.22  | 0.93 (0.7 ,1.23)        | 0.61  | 0.91 (0.79 ,1.04) | 0.18  | 0.92 (0.69 ,1.23)                    | 0.57  | 0.91 (0.79 ,1.05) | 0.20  |
| 20.1-30% X Hispanic             | 1.32 (0.86 ,2.02) | 0.20  | 1 (0.74 ,1.34)    | 0.98  | 1.3 (0.84 ,2.04)        | 0.24  | 0.96 (0.72 ,1.28) | 0.78  | 1.36 (0.86 ,2.15)                    | 0.19  | 0.93 (0.69 ,1.25) | 0.63  |
| 30.1%- X Hispanic               | 0.75 (0.42 ,1.34) | 0.33  | 1.16 (0.89 ,1.51) | 0.28  | 0.71 (0.4 ,1.29)        | 0.26  | 1.07 (0.82 ,1.4)  | 0.63  | 0.74 (0.41 ,1.35)                    | 0.33  | 1.21 (0.92 ,1.58) | 0.17  |
| <b>Sex</b>                      |                   |       |                   |       |                         |       |                   |       |                                      |       |                   |       |
| Male                            |                   |       |                   |       | reference               |       |                   |       | reference                            |       | reference         |       |
| Female                          |                   |       |                   |       | 1.06 (1.03 ,1.08)       | 0.000 | 0.98 (0.96 ,0.99) | 0.000 | 1.06 (1.03 ,1.08)                    | 0.000 | 0.96 (0.95 ,0.97) | 0.000 |
| <b>Urgency</b>                  |                   |       |                   |       |                         |       |                   |       |                                      |       |                   |       |
| Urgent                          |                   |       |                   |       | 0.99 (0.96 ,1.03)       | 0.78  | 0.97 (0.93 ,1.02) | 0.197 | 1.01 (0.97 ,1.05)                    | 0.58  | 0.97 (0.93 ,1.01) | 0.10  |
| Emergent                        |                   |       |                   |       | reference               |       |                   |       | reference                            |       | reference         |       |

|                                | Unadjusted  |   |             |   | Patient Characteristics |       |                   |       | Patient and Hospital Characteristics |       |                   |       |
|--------------------------------|-------------|---|-------------|---|-------------------------|-------|-------------------|-------|--------------------------------------|-------|-------------------|-------|
|                                | STEMI       |   | NSTEMI      |   | STEMI                   |       | NSTEMI            |       | STEMI                                |       | NSTEMI            |       |
|                                | OR (95% CI) | P | OR (95% CI) | P | OR (95% CI)             | P     | OR (95% CI)       | P     | OR (95% CI)                          | P     | OR (95% CI)       | P     |
| Admission source               |             |   |             |   |                         |       |                   |       |                                      |       |                   |       |
| Community                      |             |   |             |   | reference               |       |                   |       | reference                            |       | reference         |       |
| Hospital                       |             |   |             |   | 0.83 (0.8 ,0.87)        | 0.000 | 0.67 (0.64 ,0.7)  | 0.000 | 0.94 (0.9 ,0.98)                     | 0.003 | 0.84 (0.81 ,0.87) | 0.000 |
| SNF/Nursing Home               |             |   |             |   | 0.67 (0.6 ,0.75)        | 0.000 | 0.89 (0.85 ,0.93) | 0.000 | 0.66 (0.59 ,0.75)                    | 0.000 | 0.86 (0.81 ,0.9)  | 0.000 |
| Other                          |             |   |             |   | 0.94 (0.86 ,1.03)       | 0.16  | 0.77 (0.72 ,0.83) | 0.000 | 0.98 (0.9 ,1.07)                     | 0.69  | 0.87 (0.81 ,0.93) | 0.000 |
| Dual-eligible                  |             |   |             |   | 1.22 (1.18 ,1.26)       | 0.000 | 1.18 (1.16 ,1.2)  | 0.000 | 1.21 (1.17 ,1.24)                    | 0.000 | 1.14 (1.12 ,1.15) | 0.000 |
| Body Mass Index                |             |   |             |   |                         |       |                   |       |                                      |       |                   |       |
| Underweight                    |             |   |             |   | 0.9 (0.81 ,1)           | 0.046 | 0.92 (0.88 ,0.96) | 0.000 | 0.91 (0.82 ,1.01)                    | 0.07  | 0.93 (0.89 ,0.97) | 0.001 |
| Morbid obesity                 |             |   |             |   | 1 (0.94 ,1.06)          | 0.96  | 1 (0.97 ,1.02)    | 0.87  | 1.01 (0.94 ,1.07)                    | 0.87  | 1.01 (0.98 ,1.03) | 0.64  |
| Myocardial infarction location |             |   |             |   |                         |       |                   |       |                                      |       |                   |       |
| Inferior wall                  |             |   |             |   | reference               |       | NA                |       | reference                            |       | NA                |       |
| Anterior wall                  |             |   |             |   | 1.16 (1.13 ,1.18)       | 0.000 | NA                |       | 1.15 (1.12 ,1.18)                    | 0.000 | NA                |       |
| Lateral wall                   |             |   |             |   | 1.1 (1.06 ,1.15)        | 0.000 | NA                |       | 1.1 (1.05 ,1.15)                     | 0.000 | NA                |       |
| Unspecified                    |             |   |             |   | 1.27 (1.23 ,1.32)       | 0.000 | NA                |       | 1.2 (1.16 ,1.24)                     | 0.000 | NA                |       |
| Congestive heart failure       |             |   |             |   |                         |       |                   |       |                                      |       |                   |       |
| Systolic                       |             |   |             |   | 1.51 (1.46 ,1.56)       | 0.000 | 1.25 (1.23 ,1.28) | 0.000 | 1.54 (1.49 ,1.59)                    | 0.000 | 1.28 (1.26 ,1.3)  | 0.000 |
| Diastolic                      |             |   |             |   | 1.35 (1.28 ,1.41)       | 0.000 | 1.26 (1.24 ,1.29) | 0.000 | 1.35 (1.29 ,1.42)                    | 0.000 | 1.28 (1.25 ,1.3)  | 0.000 |
| Systolic & Diastolic           |             |   |             |   | 1.51 (1.43 ,1.6)        | 0.000 | 1.25 (1.22 ,1.28) | 0.000 | 1.53 (1.45 ,1.61)                    | 0.000 | 1.27 (1.24 ,1.3)  | 0.000 |
| Unspecified                    |             |   |             |   | 1.27 (1.21 ,1.33)       | 0.000 | 1.33 (1.3 ,1.36)  | 0.000 | 1.24 (1.18 ,1.3)                     | 0.000 | 1.26 (1.24 ,1.29) | 0.000 |
| Right heart failure            |             |   |             |   | 1.29 (1.05 ,1.59)       | 0.01  | 0.94 (0.82 ,1.08) | 0.000 | 1.31 (1.07 ,1.61)                    | 0.01  | 0.93 (0.81 ,1.07) | 0.29  |
| Biventricular heart failure    |             |   |             |   | 0.99 (0.79 ,1.24)       | 0.94  | 0.86 (0.76 ,0.97) | 0.40  | 1.03 (0.82 ,1.3)                     | 0.78  | 0.91 (0.8 ,1.03)  | 0.14  |
| End-stage heart failure        |             |   |             |   | 0.67 (0.45 ,1)          | 0.049 | 0.65 (0.55 ,0.77) | 0.02  | 0.67 (0.46 ,1)                       | 0.049 | 0.66 (0.56 ,0.79) | 0.000 |
| Complications of AMI           |             |   |             |   |                         |       |                   |       |                                      |       |                   |       |
| Ventricular septal defect      |             |   |             |   | 1.9 (1.6 ,2.3)          | 0.000 | 1.8 (1.2 ,2.9)    | 0.01  | 2 (1.7 ,2.4)                         | 0.000 | 2 (1.3 ,3.3)      | 0.003 |
| LV rupture                     |             |   |             |   | 0.6 (0.4 ,0.8)          | 0.004 | 0.6 (0.4 ,1.1)    | 0.10  | 0.6 (0.4 ,0.9)                       | 0.005 | 0.7 (0.4 ,1.2)    | 0.163 |
| Papillary muscle rupture       |             |   |             |   | 1.6 (1.1 ,2.4)          | 0.013 | 1.3 (0.8 ,2.2)    | 0.24  | 1.7 (1.2 ,2.5)                       | 0.007 | 1.4 (0.9 ,2.4)    | 0.148 |
| Prior procedures               |             |   |             |   |                         |       |                   |       |                                      |       |                   |       |
| PCI                            |             |   |             |   | 1.02 (0.99 ,1.05)       | 0.20  | 1 (0.98 ,1.01)    | 0.77  | 1.02 (0.99 ,1.05)                    | 0.21  | 1.01 (1 ,1.03)    | 0.032 |
| CABG                           |             |   |             |   | 0.99 (0.95 ,1.03)       | 0.57  | 0.91 (0.9 ,0.93)  | 0.000 | 0.99 (0.95 ,1.03)                    | 0.59  | 0.92 (0.9 ,0.93)  | 0.00  |
| Heart valve surgery            |             |   |             |   | 1.14 (1.03 ,1.26)       | 0.01  | 1.12 (1.08 ,1.15) | 0.000 | 1.15 (1.03 ,1.27)                    | 0.009 | 1.13 (1.1 ,1.17)  | 0.00  |
| Dialysis                       |             |   |             |   | 1.64 (1.52 ,1.78)       | 0.000 | 1.58 (1.54 ,1.62) | 0.000 | 1.62 (1.5 ,1.75)                     | 0.000 | 1.58 (1.54 ,1.62) | 0.000 |
| AICD                           |             |   |             |   | 1.17 (1.06 ,1.28)       | 0.002 | 0.98 (0.96 ,1.01) | 0.28  | 1.16 (1.06 ,1.28)                    | 0.002 | 0.99 (0.96 ,1.02) | 0.52  |
| COVID                          |             |   |             |   | 0.92 (0.7 ,1.21)        | 0.57  | 0.97 (0.83 ,1.13) | 0.69  | 0.94 (0.71 ,1.24)                    | 0.66  | 0.96 (0.83 ,1.13) | 0.65  |
| Functional Status              |             |   |             |   |                         |       |                   |       |                                      |       |                   |       |
| Wheel-chair                    |             |   |             |   | 0.92 (0.76 ,1.1)        | 0.35  | 0.91 (0.85 ,0.97) | 0.005 | 0.92 (0.77 ,1.11)                    | 0.39  | 0.92 (0.85 ,0.98) | 0.02  |
| Supplemental oxygen            |             |   |             |   | 1.07 (0.99 ,1.15)       | 0.08  | 1.13 (1.1 ,1.16)  | 0.000 | 1.06 (0.98 ,1.14)                    | 0.13  | 1.12 (1.09 ,1.15) | 0.000 |
| Dependent on provider          |             |   |             |   | 0.83 (0.69 ,1.01)       | 0.06  | 0.89 (0.83 ,0.96) | 0.003 | 0.8 (0.66 ,0.97)                     | 0.02  | 0.86 (0.8 ,0.93)  | 0.000 |
| Elixhauser comorbidities       |             |   |             |   |                         |       |                   |       |                                      |       |                   |       |
| Cardiac arrhythmias            |             |   |             |   | 1.09 (1.07 ,1.12)       | 0.000 | 1.05 (1.04 ,1.06) | 0.000 | 1.1 (1.07 ,1.12)                     | 0.000 | 1.06 (1.05 ,1.07) | 0.000 |
| Valvular heart disease         |             |   |             |   | 1.18 (1.15 ,1.22)       | 0.000 | 1.17 (1.15 ,1.19) | 0.000 | 1.2 (1.17 ,1.24)                     | 0.000 | 1.21 (1.2 ,1.23)  | 0.000 |
| Pulmonary circulation          |             |   |             |   | 1.09 (1.04 ,1.15)       | 0.000 | 1.04 (1.02 ,1.06) | 0.000 | 1.1 (1.04 ,1.15)                     | 0.000 | 1.04 (1.02 ,1.06) | 0.000 |
| Peripheral vascular disorder   |             |   |             |   | 1.16 (1.12 ,1.2)        | 0.000 | 1.12 (1.1 ,1.14)  | 0.000 | 1.17 (1.13 ,1.21)                    | 0.000 | 1.15 (1.13 ,1.17) | 0.000 |

|                                       | Unadjusted  |   |             |   | Patient Characteristics |       |                   |       | Patient and Hospital Characteristics |       |                   |       |
|---------------------------------------|-------------|---|-------------|---|-------------------------|-------|-------------------|-------|--------------------------------------|-------|-------------------|-------|
|                                       | STEMI       |   | NSTEMI      |   | STEMI                   |       | NSTEMI            |       | STEMI                                |       | NSTEMI            |       |
|                                       | OR (95% CI) | P | OR (95% CI) | P | OR (95% CI)             | P     | OR (95% CI)       | P     | OR (95% CI)                          | P     | OR (95% CI)       | P     |
| Hypertension, uncomplicated           |             |   |             |   | 1.08 (1.05 ,1.11)       | 0.000 | 0.98 (0.96 ,1)    | 0.04  | 1.08 (1.05 ,1.12)                    | 0.000 | 1.01 (0.99 ,1.02) | 0.41  |
| Hypertension, complicated             |             |   |             |   | 1.14 (1.1 ,1.18)        | 0.000 | 1.02 (1 ,1.04)    | 0.03  | 1.15 (1.11 ,1.19)                    | 0.000 | 1.06 (1.04 ,1.08) | 0.000 |
| Paralysis                             |             |   |             |   | 1.56 (1.37 ,1.78)       | 0.000 | 1.35 (1.26 ,1.45) | 0.000 | 1.56 (1.36 ,1.78)                    | 0.000 | 1.38 (1.28 ,1.48) | 0.000 |
| Neurologic disorder, other            |             |   |             |   | 0.87 (0.83 ,0.91)       | 0.000 | 0.93 (0.91 ,0.95) | 0.000 | 0.87 (0.83 ,0.9)                     | 0.000 | 0.92 (0.9 ,0.94)  | 0.000 |
| Chronic pulmonary disease             |             |   |             |   | 1.18 (1.15 ,1.22)       | 0.000 | 1.15 (1.14 ,1.17) | 0.000 | 1.18 (1.15 ,1.21)                    | 0.000 | 1.15 (1.13 ,1.16) | 0.000 |
| Diabetes, uncomplicated               |             |   |             |   | 1.14 (1.11 ,1.17)       | 0.000 | 1.17 (1.16 ,1.19) | 0.000 | 1.13 (1.1 ,1.17)                     | 0.000 | 1.16 (1.15 ,1.18) | 0.000 |
| Diabetes, complicated                 |             |   |             |   | 1.29 (1.25 ,1.32)       | 0.000 | 1.23 (1.22 ,1.25) | 0.000 | 1.3 (1.26 ,1.34)                     | 0.000 | 1.26 (1.24 ,1.27) | 0.000 |
| Hypothyroidism                        |             |   |             |   | 1.01 (0.98 ,1.04)       | 0.69  | 0.99 (0.97 ,1)    | 0.06  | 1.01 (0.98 ,1.04)                    | 0.51  | 0.99 (0.98 ,1.01) | 0.37  |
| Renal failure                         |             |   |             |   | 1.12 (1.08 ,1.16)       | 0.000 | 1.11 (1.09 ,1.13) | 0.000 | 1.12 (1.08 ,1.16)                    | 0.000 | 1.11 (1.09 ,1.13) | 0.000 |
| Liver disease                         |             |   |             |   | 0.89 (0.84 ,0.94)       | 0.000 | 0.97 (0.94 ,1)    | 0.09  | 0.89 (0.84 ,0.95)                    | 0.000 | 0.98 (0.95 ,1.01) | 0.27  |
| Peptic ulcer disease                  |             |   |             |   | 1.11 (0.96 ,1.27)       | 0.16  | 1.16 (1.09 ,1.22) | 0.000 | 1.1 (0.96 ,1.27)                     | 0.17  | 1.18 (1.11 ,1.24) | 0.000 |
| AIDS/HIV                              |             |   |             |   | 1.19 (0.85 ,1.67)       | 0.30  | 1.09 (0.92 ,1.3)  | 0.32  | 1.19 (0.85 ,1.67)                    | 0.30  | 1.11 (0.93 ,1.32) | 0.25  |
| Lymphoma                              |             |   |             |   | 1.1 (0.95 ,1.27)        | 0.18  | 1.21 (1.15 ,1.28) | 0.000 | 1.12 (0.97 ,1.3)                     | 0.11  | 1.23 (1.17 ,1.3)  | 0.000 |
| Metastatic cancer                     |             |   |             |   | 1.13 (1.02 ,1.25)       | 0.02  | 1.03 (0.98 ,1.08) | 0.21  | 1.14 (1.03 ,1.26)                    | 0.01  | 1.02 (0.97 ,1.07) | 0.35  |
| Solid tumor                           |             |   |             |   | 1.19 (1.11 ,1.27)       | 0.000 | 1.13 (1.09 ,1.16) | 0.000 | 1.18 (1.11 ,1.26)                    | 0.000 | 1.13 (1.1 ,1.16)  | 0.000 |
| Rheumatoid arthritis                  |             |   |             |   | 1.09 (1.03 ,1.16)       | 0.004 | 1.06 (1.04 ,1.09) | 0.000 | 1.1 (1.04 ,1.17)                     | 0.001 | 1.08 (1.06 ,1.11) | 0.000 |
| Coagulopathy                          |             |   |             |   | 1.08 (1.03 ,1.14)       | 0.004 | 1.02 (0.99 ,1.04) | 0.21  | 1.08 (1.03 ,1.14)                    | 0.003 | 1.03 (1.01 ,1.06) | 0.008 |
| Weight loss                           |             |   |             |   | 1.13 (1.06 ,1.21)       | 0.000 | 1 (0.97 ,1.03)    | 0.89  | 1.12 (1.05 ,1.2)                     | 0.001 | 0.97 (0.94 ,1.01) | 0.12  |
| Fluid and electrolyte disorder        |             |   |             |   | 1.03 (1.01 ,1.06)       | 0.020 | 1.07 (1.05 ,1.08) | 0.000 | 1.02 (0.99 ,1.05)                    | 0.15  | 1.05 (1.04 ,1.06) | 0.000 |
| Anemia, blood loss                    |             |   |             |   | 1.55 (1.37 ,1.76)       | 0.000 | 1.23 (1.17 ,1.3)  | 0.000 | 1.53 (1.35 ,1.75)                    | 0.000 | 1.22 (1.16 ,1.29) | 0.000 |
| Anemia, deficiency                    |             |   |             |   | 1.28 (1.21 ,1.36)       | 0.000 | 1.13 (1.1 ,1.16)  | 0.000 | 1.29 (1.21 ,1.37)                    | 0.000 | 1.14 (1.11 ,1.17) | 0.000 |
| Alcohol abuse                         |             |   |             |   | 1.09 (1.01 ,1.17)       | 0.02  | 1.06 (1.02 ,1.1)  | 0.001 | 1.09 (1.01 ,1.18)                    | 0.02  | 1.05 (1.01 ,1.09) | 0.008 |
| Drug abuse                            |             |   |             |   | 1.22 (1.11 ,1.34)       | 0.000 | 1.1 (1.05 ,1.15)  | 0.000 | 1.2 (1.1 ,1.32)                      | 0.000 | 1.09 (1.04 ,1.14) | 0.000 |
| Psychoses                             |             |   |             |   | 1.34 (1.15 ,1.57)       | 0.000 | 1.23 (1.16 ,1.31) | 0.000 | 1.32 (1.13 ,1.54)                    | 0.001 | 1.18 (1.11 ,1.25) | 0.000 |
| Depression                            |             |   |             |   | 1.08 (1.04 ,1.12)       | 0.000 | 1.01 (0.99 ,1.03) | 0.22  | 1.09 (1.05 ,1.13)                    | 0.000 | 1.02 (1.01 ,1.04) | 0.009 |
| Volume of AMI hospitalizations        |             |   |             |   |                         |       |                   |       |                                      |       |                   |       |
| <200                                  |             |   |             |   |                         |       |                   |       | reference                            |       | reference         |       |
| 200-499                               |             |   |             |   |                         |       |                   |       | 0.78 (0.73 ,0.83)                    | 0.000 | 0.59 (0.56 ,0.63) | 0.000 |
| 500-999                               |             |   |             |   |                         |       |                   |       | 0.65 (0.61 ,0.69)                    | 0.000 | 0.43 (0.41 ,0.46) | 0.000 |
| 1000-1999                             |             |   |             |   |                         |       |                   |       | 0.57 (0.53 ,0.61)                    | 0.000 | 0.35 (0.33 ,0.37) | 0.000 |
| 2000-                                 |             |   |             |   |                         |       |                   |       | 0.53 (0.49 ,0.58)                    | 0.000 | 0.31 (0.29 ,0.34) | 0.000 |
| Proportion of minority patients (AMI) |             |   |             |   |                         |       |                   |       |                                      |       |                   |       |
| <5%                                   |             |   |             |   |                         |       |                   |       | reference                            |       | reference         |       |
| 5.0-9.9%                              |             |   |             |   |                         |       |                   |       | 1.1 (1.04 ,1.16)                     | 0     | 1.04 (0.98 ,1.1)  | 0.167 |
| 10.0-24.9                             |             |   |             |   |                         |       |                   |       | 1.05 (1 ,1.1)                        | 0.049 | 1 (0.95 ,1.06)    | 0.882 |
| 25.0-49.9%                            |             |   |             |   |                         |       |                   |       | 1.05 (1 ,1.11)                       | 0.07  | 1.02 (0.96 ,1.07) | 0.585 |
| 50.0%-                                |             |   |             |   |                         |       |                   |       | 1.11 (1.01 ,1.21)                    | 0.029 | 1.09 (1 ,1.19)    | 0.056 |

|                                         | Unadjusted       |       |                  |       | Patient Characteristics |       |                  |       | Patient and Hospital Characteristics |       |                  |       |
|-----------------------------------------|------------------|-------|------------------|-------|-------------------------|-------|------------------|-------|--------------------------------------|-------|------------------|-------|
|                                         | STEMI            |       | NSTEMI           |       | STEMI                   |       | NSTEMI           |       | STEMI                                |       | NSTEMI           |       |
|                                         | OR (95% CI)      | P     | OR (95% CI)      | P     | OR (95% CI)             | P     | OR (95% CI)      | P     | OR (95% CI)                          | P     | OR (95% CI)      | P     |
| Disproportionate share percentage (DSH) |                  |       |                  |       |                         |       |                  |       |                                      |       |                  |       |
| 0-9.9%                                  |                  |       |                  |       |                         |       |                  |       | reference                            |       | reference        |       |
| 10.0-24.9%                              |                  |       |                  |       |                         |       |                  |       | 1.09 (1.01,1.17)                     | 0.03  | 1 (0.91,1.09)    | 0.93  |
| 25.0-49.9%                              |                  |       |                  |       |                         |       |                  |       | 1.06 (0.98,1.14)                     | 0.12  | 0.96 (0.88,1.05) | 0.39  |
| 50.0%-                                  |                  |       |                  |       |                         |       |                  |       | 1.18 (1.07,1.3)                      | 0.00  | 0.97 (0.87,1.08) | 0.56  |
| Resident-to-bed ratio                   |                  |       |                  |       |                         |       |                  |       |                                      |       |                  |       |
| 0                                       |                  |       |                  |       |                         |       |                  |       | reference                            |       | reference        |       |
| >0-0.10                                 |                  |       |                  |       |                         |       |                  |       | 0.89 (0.85,0.93)                     | 0.000 | 0.93 (0.89,0.98) | 0.002 |
| 0.11-0.20                               |                  |       |                  |       |                         |       |                  |       | 0.9 (0.85,0.95)                      | 0.000 | 0.94 (0.89,1)    | 0.05  |
| 0.21-0.40                               |                  |       |                  |       |                         |       |                  |       | 0.9 (0.85,0.95)                      | 0.000 | 0.98 (0.91,1.05) | 0.56  |
| 0.41-                                   |                  |       |                  |       |                         |       |                  |       | 0.84 (0.79,0.89)                     | 0.000 | 0.91 (0.85,0.97) | 0.004 |
| Rurality                                |                  |       |                  |       |                         |       |                  |       |                                      |       |                  |       |
| Rural hospital                          |                  |       |                  |       |                         |       |                  |       | reference                            |       | reference        |       |
| Large urban hospital                    |                  |       |                  |       |                         |       |                  |       | 0.93 (0.87,1)                        | 0.048 | 0.96 (0.9,1.03)  | 0.28  |
| Other urban hospital                    |                  |       |                  |       |                         |       |                  |       | 0.84 (0.79,0.9)                      | 0.00  | 0.83 (0.78,0.89) | 0.000 |
| Time                                    | 1 (1,1)          | 0.019 | 1 (1,1)          | 0.000 | 1 (1,1)                 | 0.000 | 1 (1,1)          | 0.000 | 1 (1,1)                              | 0.002 | 1 (1,1)          | 0.12  |
| Admission month                         |                  |       |                  |       |                         |       |                  |       |                                      |       |                  |       |
| January                                 | reference        |       |                  |       | reference               |       |                  |       | reference                            |       | reference        |       |
| February                                | 0.98 (0.93,1.03) | 0.41  | 0.98 (0.96,1)    | 0.11  | 0.98 (0.93,1.02)        | 0.32  | 0.99 (0.97,1.01) | 0.22  | 0.98 (0.93,1.02)                     | 0.33  | 0.99 (0.97,1.01) | 0.35  |
| March                                   | 0.98 (0.93,1.03) | 0.36  | 0.98 (0.96,1)    | 0.08  | 0.98 (0.93,1.03)        | 0.36  | 0.98 (0.96,1.01) | 0.18  | 0.97 (0.93,1.03)                     | 0.31  | 0.99 (0.97,1.01) | 0.43  |
| April                                   | 0.95 (0.9,1)     | 0.07  | 0.97 (0.94,0.99) | 0.004 | 0.95 (0.9,1)            | 0.06  | 0.97 (0.95,1)    | 0.04  | 0.95 (0.9,1)                         | 0.05  | 0.98 (0.96,1.01) | 0.12  |
| May                                     | 0.97 (0.92,1.02) | 0.18  | 0.97 (0.95,0.99) | 0.013 | 0.96 (0.91,1.01)        | 0.12  | 0.98 (0.96,1.01) | 0.13  | 0.96 (0.91,1.01)                     | 0.13  | 0.99 (0.97,1.01) | 0.40  |
| June                                    | 0.95 (0.91,1)    | 0.07  | 0.97 (0.94,0.99) | 0.005 | 0.96 (0.91,1.01)        | 0.12  | 0.98 (0.96,1.01) | 0.14  | 0.96 (0.91,1.01)                     | 0.11  | 0.99 (0.97,1.02) | 0.54  |
| July                                    | 1 (0.95,1.06)    | 0.88  | 0.94 (0.92,0.97) | 0.000 | 1.01 (0.96,1.06)        | 0.77  | 0.96 (0.94,0.99) | 0.003 | 1.01 (0.95,1.06)                     | 0.84  | 0.97 (0.95,1)    | 0.02  |
| August                                  | 0.99 (0.94,1.04) | 0.76  | 0.94 (0.92,0.97) | 0.000 | 0.99 (0.94,1.04)        | 0.70  | 0.96 (0.94,0.98) | 0.001 | 0.99 (0.94,1.04)                     | 0.71  | 0.97 (0.94,0.99) | 0.006 |
| September                               | 0.99 (0.94,1.04) | 0.56  | 0.95 (0.93,0.98) | 0.000 | 0.98 (0.93,1.03)        | 0.50  | 0.97 (0.95,0.99) | 0.007 | 0.98 (0.93,1.03)                     | 0.46  | 0.97 (0.95,1)    | 0.03  |
| October                                 | 0.96 (0.92,1.01) | 0.14  | 0.96 (0.94,0.98) | 0.001 | 0.96 (0.91,1.01)        | 0.12  | 0.97 (0.95,1)    | 0.02  | 0.96 (0.91,1.01)                     | 0.11  | 0.97 (0.95,1)    | 0.03  |
| November                                | 0.93 (0.88,0.98) | 0.01  | 0.94 (0.92,0.96) | 0.000 | 0.92 (0.87,0.97)        | 0.002 | 0.95 (0.93,0.97) | 0.000 | 0.92 (0.87,0.97)                     | 0.001 | 0.95 (0.93,0.97) | 0.000 |
| December                                | 0.74 (0.7,0.79)  | 0.000 | 0.78 (0.76,0.8)  | 0.000 | 0.75 (0.71,0.79)        | 0.000 | 0.79 (0.77,0.81) | 0.000 | 0.74 (0.7,0.79)                      | 0.000 | 0.78 (0.76,0.8)  | 0.000 |
| COVID-19 month                          |                  |       |                  |       |                         |       |                  |       |                                      |       |                  |       |
| March                                   | reference        |       |                  |       | reference               |       |                  |       | reference                            |       | reference        |       |
| April                                   | 0.83 (0.73,0.94) | 0.00  | 0.8 (0.76,0.85)  | 0.000 | 0.83 (0.73,0.94)        | 0.003 | 0.81 (0.76,0.85) | 0.000 | 0.83 (0.74,0.94)                     | 0.004 | 0.79 (0.75,0.84) | 0.000 |
| May                                     | 0.95 (0.83,1.09) | 0.48  | 0.95 (0.88,1.01) | 0.12  | 0.96 (0.83,1.1)         | 0.55  | 0.97 (0.9,1.04)  | 0.35  | 0.97 (0.84,1.12)                     | 0.68  | 0.95 (0.89,1.02) | 0.16  |
| June                                    | 0.99 (0.88,1.11) | 0.86  | 1.01 (0.94,1.07) | 0.86  | 0.99 (0.88,1.12)        | 0.88  | 1.02 (0.96,1.08) | 0.59  | 0.99 (0.88,1.12)                     | 0.92  | 1 (0.94,1.06)    | 0.94  |
| July                                    | 1.03 (0.92,1.16) | 0.61  | 0.99 (0.93,1.05) | 0.72  | 1.02 (0.91,1.15)        | 0.72  | 1 (0.94,1.06)    | 0.94  | 1.03 (0.91,1.16)                     | 0.64  | 0.97 (0.92,1.03) | 0.36  |
| August                                  | 0.94 (0.82,1.07) | 0.32  | 1.01 (0.94,1.08) | 0.81  | 0.94 (0.82,1.07)        | 0.35  | 1.02 (0.95,1.09) | 0.59  | 0.95 (0.83,1.09)                     | 0.47  | 1 (0.93,1.07)    | 0.96  |
| September                               | 0.81 (0.71,0.93) | 0.00  | 1.03 (0.96,1.1)  | 0.40  | 0.81 (0.71,0.93)        | 0.003 | 1.05 (0.98,1.12) | 0.19  | 0.81 (0.71,0.93)                     | 0.004 | 1.02 (0.96,1.09) | 0.53  |
| October                                 | 1.03 (0.89,1.18) | 0.70  | 1.07 (1,1.15)    | 0.07  | 1.03 (0.89,1.19)        | 0.71  | 1.08 (1.01,1.16) | 0.03  | 1.04 (0.9,1.2)                       | 0.60  | 1.06 (0.99,1.13) | 0.11  |
| November                                | 0.92 (0.79,1.06) | 0.24  | 0.97 (0.9,1.04)  | 0.35  | 0.91 (0.79,1.05)        | 0.21  | 0.99 (0.92,1.06) | 0.75  | 0.92 (0.8,1.07)                      | 0.28  | 0.96 (0.9,1.03)  | 0.31  |

**eTable 9. Non-Home Discharges for STEMI and NSTEMI with the interaction of race/ethnicity and hospital COVID-19 burden**

|                                 | Unadjusted          |       |                   |       | Patient Characteristics |       |                   |       | Patient and Hospital Characteristics |       |                   |       |
|---------------------------------|---------------------|-------|-------------------|-------|-------------------------|-------|-------------------|-------|--------------------------------------|-------|-------------------|-------|
|                                 | STEMI               |       | NSTEMI            |       | STEMI                   |       | NSTEMI            |       | STEMI                                |       | NSTEMI            |       |
|                                 | OR (95% CI)         | P     | OR (95% CI)       | P     | OR (95% CI)             | P     | OR (95% CI)       | P     | OR (95% CI)                          | P     | OR (95% CI)       | P     |
| <b>Race</b>                     |                     |       |                   |       |                         |       |                   |       |                                      |       |                   |       |
| White                           | reference           |       |                   |       | reference               |       |                   |       | reference                            |       | reference         |       |
| Black                           | 1.41 (1.36, 1.48)   | 0.000 | 1.12 (1.09, 1.15) | 0.000 | 0.94 (0.9, 0.99)        | 0.02  | 0.78 (0.75, 0.8)  | 0.000 | 0.92 (0.87, 0.96)                    | 0.001 | 0.77 (0.75, 0.79) | 0.000 |
| Hispanic                        | 1.08 (1.03, 1.14)   | 0.003 | 0.8 (0.75, 0.86)  | 0.000 | 0.86 (0.81, 0.9)        | 0.000 | 0.65 (0.62, 0.68) | 0.000 | 0.84 (0.8, 0.88)                     | 0.000 | 0.64 (0.62, 0.67) | 0.000 |
| <b>Age</b>                      |                     |       |                   |       |                         |       |                   |       |                                      |       |                   |       |
| 65-69                           | reference           |       |                   |       | reference               |       |                   |       | reference                            |       | reference         |       |
| 70-74                           | 1.21 (1.18, 1.25)   | 0.000 | 1.1 (1.08, 1.12)  | 0.000 | 1.33 (1.29, 1.38)       | 0.000 | 1.31 (1.29, 1.34) | 0.000 | 1.33 (1.29, 1.38)                    | 0.000 | 1.32 (1.29, 1.34) | 0.000 |
| 75-79                           | 1.73 (1.69, 1.78)   | 0.000 | 1.49 (1.46, 1.52) | 0.000 | 1.89 (1.83, 1.95)       | 0.000 | 1.76 (1.73, 1.8)  | 0.000 | 1.89 (1.83, 1.95)                    | 0.000 | 1.77 (1.74, 1.8)  | 0.000 |
| 80-84                           | 2.62 (2.55, 2.7)    | 0.000 | 2.08 (2.04, 2.12) | 0.000 | 2.83 (2.74, 2.93)       | 0.000 | 2.44 (2.39, 2.49) | 0.000 | 2.84 (2.75, 2.94)                    | 0.000 | 2.45 (2.4, 2.51)  | 0.000 |
| 85-89                           | 4.24 (4.11, 4.38)   | 0.000 | 3.01 (2.94, 3.07) | 0.000 | 4.47 (4.3, 4.64)        | 0.000 | 3.4 (3.33, 3.48)  | 0.000 | 4.49 (4.32, 4.66)                    | 0.000 | 3.45 (3.37, 3.53) | 0.000 |
| 90-94                           | 6.75 (6.49, 7.02)   | 0.000 | 4.38 (4.28, 4.5)  | 0.000 | 7.04 (6.71, 7.37)       | 0.000 | 4.84 (4.7, 4.98)  | 0.000 | 7.11 (6.78, 7.45)                    | 0.000 | 4.93 (4.79, 5.07) | 0.000 |
| 95-                             | 10.61 (9.98, 11.28) | 0.000 | 6.89 (6.67, 7.12) | 0.000 | 10.95 (10.2, 11.76)     | 0.000 | 7.32 (7.05, 7.6)  | 0.000 | 11.13 (10.36, 11.95)                 | 0.000 | 7.51 (7.23, 7.8)  | 0.000 |
| <b>Hospital Covid-19 burden</b> |                     |       |                   |       |                         |       |                   |       |                                      |       |                   |       |
| Before Covid-19                 | reference           |       |                   |       | reference               |       |                   |       | reference                            |       | reference         |       |
| 0.0-2.0%                        | 0.99 (0.94, 1.05)   | 0.80  | 1.01 (0.97, 1.04) | 0.67  | 0.98 (0.91, 1.04)       | 0.50  | 1 (0.96, 1.03)    | 0.82  | 0.98 (0.92, 1.05)                    | 0.53  | 1 (0.96, 1.03)    | 0.92  |
| 2.1-10.0%                       | 0.97 (0.88, 1.07)   | 0.57  | 1.02 (0.97, 1.08) | 0.46  | 0.93 (0.83, 1.04)       | 0.21  | 0.99 (0.93, 1.05) | 0.78  | 0.91 (0.81, 1.02)                    | 0.10  | 0.96 (0.91, 1.02) | 0.22  |
| 10.1-20.0%                      | 1.04 (0.92, 1.18)   | 0.49  | 1.05 (0.97, 1.13) | 0.23  | 1.03 (0.89, 1.19)       | 0.68  | 1.01 (0.93, 1.1)  | 0.76  | 1.01 (0.87, 1.16)                    | 0.91  | 0.99 (0.91, 1.08) | 0.82  |
| 20.1-30.0%                      | 0.85 (0.7, 1.03)    | 0.10  | 1.04 (0.93, 1.17) | 0.46  | 0.75 (0.59, 0.94)       | 0.01  | 1 (0.88, 1.12)    | 0.94  | 0.74 (0.59, 0.93)                    | 0.01  | 0.98 (0.87, 1.11) | 0.77  |
| 30.1%-                          | 0.89 (0.69, 1.14)   | 0.35  | 1.31 (1.13, 1.51) | 0.000 | 0.89 (0.68, 1.18)       | 0.43  | 1.32 (1.13, 1.55) | 0.001 | 0.89 (0.67, 1.17)                    | 0.39  | 1.34 (1.14, 1.57) | 0.000 |
| <b>COVID Burden X Race</b>      |                     |       |                   |       |                         |       |                   |       |                                      |       |                   |       |
| 0.0-2.0% X Black                | 1.12 (0.98, 1.28)   | 0.09  | 1.03 (0.95, 1.11) | 0.48  | 1.16 (1, 1.35)          | 0.05  | 1.02 (0.94, 1.11) | 0.56  | 1.16 (0.99, 1.34)                    | 0.06  | 1.02 (0.94, 1.11) | 0.65  |
| 2.1-10% X Black                 | 1.15 (0.97, 1.35)   | 0.10  | 1.07 (0.98, 1.17) | 0.11  | 1.08 (0.88, 1.32)       | 0.48  | 1.03 (0.93, 1.13) | 0.57  | 1.08 (0.88, 1.33)                    | 0.44  | 1.03 (0.94, 1.14) | 0.51  |
| 10.1-20% X Black                | 0.99 (0.75, 1.3)    | 0.93  | 1.2 (1.03, 1.39)  | 0.02  | 0.95 (0.68, 1.32)       | 0.76  | 1.13 (0.97, 1.33) | 0.12  | 0.96 (0.69, 1.34)                    | 0.82  | 1.14 (0.98, 1.34) | 0.10  |
| 20.1-30% X Black                | 1.03 (0.65, 1.64)   | 0.90  | 1.26 (0.97, 1.64) | 0.09  | 0.78 (0.48, 1.28)       | 0.32  | 1.29 (0.96, 1.72) | 0.09  | 0.78 (0.48, 1.29)                    | 0.34  | 1.3 (0.97, 1.74)  | 0.08  |
| 30.1%- X Black                  | 1.54 (0.78, 3.06)   | 0.21  | 0.99 (0.68, 1.45) | 0.97  | 1.47 (0.69, 3.16)       | 0.32  | 0.92 (0.61, 1.37) | 0.67  | 1.45 (0.68, 3.09)                    | 0.34  | 0.92 (0.62, 1.38) | 0.70  |
| 0.0-2.0% X Hispanic             | 1.02 (0.89, 1.18)   | 0.75  | 1.01 (0.93, 1.1)  | 0.82  | 0.95 (0.8, 1.11)        | 0.50  | 1.05 (0.95, 1.15) | 0.34  | 0.94 (0.8, 1.11)                     | 0.46  | 1.04 (0.95, 1.14) | 0.36  |
| 2.1-10% X Hispanic              | 1.17 (0.99, 1.39)   | 0.07  | 1.26 (1.13, 1.4)  | 0.000 | 1.04 (0.85, 1.27)       | 0.71  | 1.14 (1.02, 1.28) | 0.02  | 1.04 (0.85, 1.27)                    | 0.70  | 1.15 (1.03, 1.29) | 0.02  |
| 10.1-20% X Hispanic             | 0.96 (0.76, 1.21)   | 0.72  | 1.33 (1.12, 1.58) | 0.001 | 0.86 (0.64, 1.15)       | 0.31  | 1.21 (1.02, 1.44) | 0.03  | 0.86 (0.64, 1.16)                    | 0.33  | 1.21 (1.01, 1.44) | 0.04  |
| 20.1-30% X Hispanic             | 1.27 (0.81, 2)      | 0.30  | 1.23 (0.93, 1.63) | 0.14  | 1.21 (0.69, 2.11)       | 0.51  | 0.99 (0.73, 1.36) | 0.97  | 1.22 (0.7, 2.13)                     | 0.49  | 1.01 (0.74, 1.38) | 0.96  |
| 30.1%- X Hispanic               | 1.8 (1.06, 3.04)    | 0.03  | 1.36 (1, 1.84)    | 0.05  | 1.31 (0.73, 2.34)       | 0.37  | 1.04 (0.75, 1.45) | 0.81  | 1.28 (0.71, 2.3)                     | 0.41  | 1.02 (0.73, 1.42) | 0.92  |
| <b>Sex</b>                      |                     |       |                   |       |                         |       |                   |       |                                      |       |                   |       |
| Male                            |                     |       |                   |       | reference               |       |                   |       | reference                            |       | reference         |       |
| Female                          |                     |       |                   |       | 1.31 (1.28, 1.34)       | 0.000 | 1.08 (1.06, 1.09) | 0.000 | 1.32 (1.29, 1.34)                    | 0.000 | 1.08 (1.06, 1.09) | 0.000 |
| <b>Urgency</b>                  |                     |       |                   |       |                         |       |                   |       |                                      |       |                   |       |
| Urgent                          |                     |       |                   |       | 0.96 (0.92, 1.01)       | 0.09  | 0.92 (0.88, 0.95) | 0.000 | 0.96 (0.92, 1.01)                    | 0.09  | 0.92 (0.88, 0.95) | 0.000 |
| Emergent                        |                     |       |                   |       | reference               |       |                   |       | reference                            |       | reference         |       |

|                                | Unadjusted  |   |             |   | Patient Characteristics |       |                   |       | Patient and Hospital Characteristics |       |                   |       |
|--------------------------------|-------------|---|-------------|---|-------------------------|-------|-------------------|-------|--------------------------------------|-------|-------------------|-------|
|                                | STEMI       |   | NSTEMI      |   | STEMI                   |       | NSTEMI            |       | STEMI                                |       | NSTEMI            |       |
|                                | OR (95% CI) | P | OR (95% CI) | P | OR (95% CI)             | P     | OR (95% CI)       | P     | OR (95% CI)                          | P     | OR (95% CI)       | P     |
| Admission source               |             |   |             |   |                         |       |                   |       |                                      |       |                   |       |
| Community                      |             |   |             |   | reference               |       |                   |       | reference                            |       | reference         |       |
| Hospital                       |             |   |             |   | 1.18 (1.13, 1.24)       | 0.000 | 1.31 (1.26, 1.37) | 0.000 | 1.16 (1.11, 1.22)                    | 0.000 | 1.29 (1.24, 1.34) | 0.000 |
| SNF/Nursing Home               |             |   |             |   | 5.08 (4.43, 5.82)       | 0.000 | 4.95 (4.65, 5.26) | 0.000 | 5.11 (4.44, 5.87)                    | 0.000 | 5.01 (4.71, 5.33) | 0.000 |
| Other                          |             |   |             |   | 1.25 (1.14, 1.38)       | 0.000 | 1.47 (1.37, 1.57) | 0.000 | 1.24 (1.13, 1.36)                    | 0.000 | 1.45 (1.36, 1.55) | 0.000 |
| Dual-eligible                  |             |   |             |   | 1.54 (1.49, 1.58)       | 0.000 | 1.64 (1.61, 1.67) | 0.000 | 1.53 (1.49, 1.58)                    | 0.000 | 1.65 (1.62, 1.69) | 0.000 |
| Body Mass Index                |             |   |             |   |                         |       |                   |       |                                      |       |                   |       |
| Underweight                    |             |   |             |   | 0.95 (0.86, 1.06)       | 0.38  | 1.1 (1.05, 1.15)  | 0.000 | 0.95 (0.86, 1.06)                    | 0.36  | 1.1 (1.06, 1.15)  | 0.000 |
| Morbid obesity                 |             |   |             |   | 1.51 (1.43, 1.6)        | 0.000 | 1.42 (1.38, 1.46) | 0.000 | 1.52 (1.43, 1.61)                    | 0.000 | 1.43 (1.39, 1.47) | 0.000 |
| Myocardial infarction location |             |   |             |   |                         |       |                   |       |                                      |       |                   |       |
| Inferior wall                  |             |   |             |   | reference               |       | NA                |       | reference                            |       | NA                |       |
| Anterior wall                  |             |   |             |   | 1.2 (1.18, 1.23)        | 0.000 | NA                |       | 1.21 (1.18, 1.24)                    | 0.000 | NA                |       |
| Lateral wall                   |             |   |             |   | 1.23 (1.18, 1.28)       | 0.000 | NA                |       | 1.23 (1.19, 1.28)                    | 0.000 | NA                |       |
| Unspecified                    |             |   |             |   | 1.62 (1.57, 1.67)       | 0.000 | NA                |       | 1.63 (1.58, 1.69)                    | 0.000 | NA                |       |
| Congestive heart failure       |             |   |             |   |                         |       |                   |       |                                      |       |                   |       |
| Systolic                       |             |   |             |   | 1.93 (1.86, 1.99)       | 0.000 | 2.13 (2.09, 2.17) | 0.000 | 1.92 (1.86, 1.99)                    | 0.000 | 2.13 (2.09, 2.17) | 0.000 |
| Diastolic                      |             |   |             |   | 1.42 (1.35, 1.49)       | 0.000 | 1.61 (1.58, 1.65) | 0.000 | 1.42 (1.35, 1.49)                    | 0.000 | 1.62 (1.59, 1.65) | 0.000 |
| Systolic & Diastolic           |             |   |             |   | 1.91 (1.8, 2.02)        | 0.000 | 2.13 (2.08, 2.18) | 0.000 | 1.91 (1.8, 2.02)                     | 0.000 | 2.13 (2.08, 2.18) | 0.000 |
| Unspecified                    |             |   |             |   | 2.27 (2.16, 2.37)       | 0.000 | 1.82 (1.78, 1.87) | 0.000 | 2.27 (2.17, 2.38)                    | 0.000 | 1.84 (1.79, 1.89) | 0.000 |
| Right heart failure            |             |   |             |   | 3.92 (3.17, 4.86)       | 0.000 | 2.7 (2.34, 3.12)  | 0.000 | 3.91 (3.16, 4.84)                    | 0.000 | 2.73 (2.36, 3.15) | 0.000 |
| Biventricular heart failure    |             |   |             |   | 3.68 (2.95, 4.59)       | 0.000 | 1.82 (1.59, 2.08) | 0.000 | 3.65 (2.92, 4.55)                    | 0.000 | 1.82 (1.6, 2.08)  | 0.000 |
| End-stage heart failure        |             |   |             |   | 2.88 (1.93, 4.31)       | 0.000 | 2.91 (2.5, 3.4)   | 0.000 | 2.88 (1.93, 4.31)                    | 0.000 | 2.91 (2.49, 3.4)  | 0.000 |
| Complications of AMI           |             |   |             |   |                         |       |                   |       |                                      |       |                   |       |
| Ventricular septal defect      |             |   |             |   | 7.9 (6.4, 9.8)          | 0.000 | 4.6 (2.7, 7.8)    | 0.000 | 7.8 (6.3, 9.7)                       | 0.000 | 4.5 (2.7, 7.6)    | 0.000 |
| LV rupture                     |             |   |             |   | 38.1 (25.8, 56.4)       | 0.000 | 25.2 (13.5, 47)   | 0.000 | 38.4 (26, 56.9)                      | 0.000 | 25.2 (13.5, 47.1) | 0.000 |
| Papillary muscle rupture       |             |   |             |   | 9.4 (6.1, 14.7)         | 0.000 | 9.9 (5.6, 17.4)   | 0.000 | 9.3 (6, 14.5)                        | 0.000 | 9.9 (5.7, 17.4)   | 0.000 |
| Prior procedures               |             |   |             |   |                         |       |                   |       |                                      |       |                   |       |
| PCI                            |             |   |             |   | 0.8 (0.77, 0.82)        | 0.000 | 0.66 (0.65, 0.67) | 0.000 | 0.8 (0.77, 0.82)                     | 0.000 | 0.66 (0.65, 0.67) | 0.000 |
| CABG                           |             |   |             |   | 0.92 (0.89, 0.96)       | 0.000 | 0.73 (0.72, 0.75) | 0.000 | 0.92 (0.89, 0.96)                    | 0.000 | 0.73 (0.72, 0.75) | 0.000 |
| Heart valve surgery            |             |   |             |   | 1.05 (0.95, 1.15)       | 0.33  | 0.85 (0.82, 0.89) | 0.000 | 1.05 (0.95, 1.15)                    | 0.35  | 0.85 (0.82, 0.88) | 0.000 |
| Dialysis                       |             |   |             |   | 2.23 (2.05, 2.43)       | 0.000 | 1.77 (1.71, 1.83) | 0.000 | 2.24 (2.06, 2.44)                    | 0.000 | 1.77 (1.71, 1.83) | 0.000 |
| AICD                           |             |   |             |   | 0.74 (0.67, 0.82)       | 0.000 | 0.66 (0.63, 0.68) | 0.000 | 0.74 (0.67, 0.82)                    | 0.000 | 0.66 (0.63, 0.68) | 0.000 |
| COVID                          |             |   |             |   | 2.75 (2.18, 3.48)       | 0.000 | 2.31 (1.98, 2.69) | 0.000 | 2.75 (2.17, 3.49)                    | 0.000 | 2.32 (1.99, 2.71) | 0.000 |
| Functional Status              |             |   |             |   |                         |       |                   |       |                                      |       |                   |       |
| Wheel-chair                    |             |   |             |   | 1.73 (1.45, 2.07)       | 0.000 | 1.73 (1.61, 1.85) | 0.000 | 1.73 (1.45, 2.07)                    | 0.000 | 1.72 (1.6, 1.84)  | 0.000 |
| Supplemental oxygen            |             |   |             |   | 1.29 (1.2, 1.4)         | 0.000 | 1.08 (1.05, 1.11) | 0.000 | 1.3 (1.2, 1.4)                       | 0.000 | 1.09 (1.06, 1.12) | 0.000 |
| Dependent on provider          |             |   |             |   | 2.01 (1.68, 2.41)       | 0.000 | 2.18 (2.01, 2.36) | 0.000 | 2.01 (1.67, 2.41)                    | 0.000 | 2.19 (2.02, 2.38) | 0.000 |
| Elixhauser comorbidities       |             |   |             |   |                         |       |                   |       |                                      |       |                   |       |
| Cardiac arrhythmias            |             |   |             |   | 1.62 (1.58, 1.65)       | 0.000 | 1.17 (1.15, 1.18) | 0.000 | 1.62 (1.58, 1.65)                    | 0.000 | 1.17 (1.15, 1.18) | 0.000 |
| Valvular heart disease         |             |   |             |   | 0.95 (0.92, 0.99)       | 0.005 | 1.04 (1.02, 1.05) | 0.000 | 0.95 (0.92, 0.98)                    | 0.003 | 1.03 (1.02, 1.05) | 0.000 |
| Pulmonary circulation          |             |   |             |   | 1.17 (1.11, 1.23)       | 0.000 | 1.14 (1.11, 1.16) | 0.000 | 1.17 (1.11, 1.23)                    | 0.000 | 1.14 (1.11, 1.16) | 0.000 |
| Peripheral vascular disorder   |             |   |             |   | 1.32 (1.27, 1.37)       | 0.000 | 1.1 (1.08, 1.13)  | 0.000 | 1.32 (1.27, 1.37)                    | 0.000 | 1.1 (1.08, 1.12)  | 0.000 |

|                                       | Unadjusted  |   |             |   | Patient Characteristics |       |                   |       | Patient and Hospital Characteristics |       |                   |       |
|---------------------------------------|-------------|---|-------------|---|-------------------------|-------|-------------------|-------|--------------------------------------|-------|-------------------|-------|
|                                       | STEMI       |   | NSTEMI      |   | STEMI                   |       | NSTEMI            |       | STEMI                                |       | NSTEMI            |       |
|                                       | OR (95% CI) | P | OR (95% CI) | P | OR (95% CI)             | P     | OR (95% CI)       | P     | OR (95% CI)                          | P     | OR (95% CI)       | P     |
| Hypertension, uncomplicated           |             |   |             |   | 0.74 (0.72 ,0.76)       | 0.000 | 0.78 (0.77 ,0.8)  | 0.000 | 0.74 (0.72 ,0.76)                    | 0.000 | 0.78 (0.76 ,0.79) | 0.000 |
| Hypertension, complicated             |             |   |             |   | 0.79 (0.76 ,0.81)       | 0.000 | 0.84 (0.82 ,0.86) | 0.000 | 0.78 (0.75 ,0.81)                    | 0.000 | 0.83 (0.81 ,0.85) | 0.000 |
| Paralysis                             |             |   |             |   | 3.73 (3.19 ,4.37)       | 0.000 | 2.95 (2.74 ,3.19) | 0.000 | 3.74 (3.19 ,4.38)                    | 0.000 | 2.95 (2.73 ,3.19) | 0.000 |
| Neurologic disorder, other            |             |   |             |   | 4.84 (4.66 ,5.03)       | 0.000 | 2.93 (2.87 ,2.99) | 0.000 | 4.85 (4.67 ,5.04)                    | 0.000 | 2.93 (2.88 ,2.99) | 0.000 |
| Chronic pulmonary disease             |             |   |             |   | 1.11 (1.08 ,1.14)       | 0.000 | 1.03 (1.02 ,1.05) | 0.000 | 1.11 (1.08 ,1.14)                    | 0.000 | 1.03 (1.02 ,1.05) | 0.000 |
| Diabetes, uncomplicated               |             |   |             |   | 1.2 (1.17 ,1.23)        | 0.000 | 1.04 (1.03 ,1.06) | 0.000 | 1.2 (1.17 ,1.24)                     | 0.000 | 1.04 (1.03 ,1.06) | 0.000 |
| Diabetes, complicated                 |             |   |             |   | 1.43 (1.39 ,1.47)       | 0.000 | 1.3 (1.28 ,1.32)  | 0.000 | 1.42 (1.38 ,1.47)                    | 0.000 | 1.3 (1.28 ,1.32)  | 0.000 |
| Hypothyroidism                        |             |   |             |   | 0.93 (0.91 ,0.96)       | 0.000 | 0.97 (0.96 ,0.98) | 0.000 | 0.93 (0.91 ,0.96)                    | 0.000 | 0.97 (0.96 ,0.98) | 0.000 |
| Renal failure                         |             |   |             |   | 1.25 (1.21 ,1.29)       | 0.000 | 1.17 (1.15 ,1.19) | 0.000 | 1.25 (1.21 ,1.29)                    | 0.000 | 1.18 (1.16 ,1.2)  | 0.000 |
| Liver disease                         |             |   |             |   | 2.55 (2.42 ,2.69)       | 0.000 | 1.69 (1.64 ,1.75) | 0.000 | 2.55 (2.42 ,2.69)                    | 0.000 | 1.69 (1.64 ,1.74) | 0.000 |
| Peptic ulcer disease                  |             |   |             |   | 1.08 (0.94 ,1.24)       | 0.29  | 1.12 (1.06 ,1.19) | 0.000 | 1.08 (0.94 ,1.24)                    | 0.29  | 1.12 (1.05 ,1.19) | 0.000 |
| AIDS/HIV                              |             |   |             |   | 0.93 (0.62 ,1.37)       | 0.70  | 0.96 (0.76 ,1.2)  | 0.71  | 0.92 (0.62 ,1.36)                    | 0.68  | 0.96 (0.76 ,1.2)  | 0.70  |
| Lymphoma                              |             |   |             |   | 1.19 (1.04 ,1.36)       | 0.01  | 0.99 (0.93 ,1.05) | 0.65  | 1.18 (1.03 ,1.35)                    | 0.02  | 0.98 (0.93 ,1.05) | 0.62  |
| Metastatic cancer                     |             |   |             |   | 1.93 (1.75 ,2.12)       | 0.000 | 1.86 (1.77 ,1.95) | 0.000 | 1.93 (1.75 ,2.12)                    | 0.000 | 1.87 (1.78 ,1.96) | 0.000 |
| Solid tumor                           |             |   |             |   | 1.35 (1.27 ,1.44)       | 0.000 | 1.2 (1.16 ,1.24)  | 0.000 | 1.35 (1.27 ,1.44)                    | 0.000 | 1.2 (1.17 ,1.24)  | 0.000 |
| Rheumatoid arthritis                  |             |   |             |   | 0.95 (0.9 ,1.01)        | 0.10  | 1.04 (1.01 ,1.07) | 0.007 | 0.95 (0.9 ,1.01)                     | 0.10  | 1.04 (1.01 ,1.07) | 0.01  |
| Coagulopathy                          |             |   |             |   | 1.69 (1.61 ,1.78)       | 0.000 | 1.41 (1.38 ,1.44) | 0.000 | 1.69 (1.6 ,1.77)                     | 0.000 | 1.4 (1.37 ,1.44)  | 0.000 |
| Weight loss                           |             |   |             |   | 2.35 (2.19 ,2.53)       | 0.000 | 2.5 (2.41 ,2.58)  | 0.000 | 2.36 (2.19 ,2.54)                    | 0.000 | 2.51 (2.43 ,2.6)  | 0.000 |
| Fluid and electrolyte disorder        |             |   |             |   | 2.58 (2.51 ,2.65)       | 0.000 | 1.86 (1.84 ,1.89) | 0.000 | 2.58 (2.51 ,2.65)                    | 0.000 | 1.86 (1.84 ,1.89) | 0.000 |
| Anemia, blood loss                    |             |   |             |   | 1.26 (1.09 ,1.46)       | 0.002 | 1.21 (1.15 ,1.29) | 0.000 | 1.26 (1.09 ,1.47)                    | 0.002 | 1.22 (1.15 ,1.29) | 0.000 |
| Anemia, deficiency                    |             |   |             |   | 0.97 (0.9 ,1.03)        | 0.34  | 1.05 (1.02 ,1.08) | 0.000 | 0.97 (0.9 ,1.03)                     | 0.33  | 1.05 (1.03 ,1.08) | 0.000 |
| Alcohol abuse                         |             |   |             |   | 1.17 (1.09 ,1.26)       | 0.00  | 1.19 (1.15 ,1.24) | 0.000 | 1.16 (1.08 ,1.26)                    | 0.00  | 1.2 (1.15 ,1.24)  | 0.000 |
| Drug abuse                            |             |   |             |   | 0.93 (0.85 ,1.03)       | 0.16  | 0.9 (0.85 ,0.95)  | 0.000 | 0.93 (0.85 ,1.03)                    | 0.17  | 0.9 (0.85 ,0.95)  | 0.000 |
| Psychoses                             |             |   |             |   | 2.36 (2.01 ,2.77)       | 0.000 | 2.32 (2.17 ,2.49) | 0.000 | 2.37 (2.02 ,2.77)                    | 0.000 | 2.34 (2.19 ,2.51) | 0.000 |
| Depression                            |             |   |             |   | 1.2 (1.16 ,1.25)        | 0.000 | 1.28 (1.26 ,1.31) | 0.000 | 1.2 (1.16 ,1.25)                     | 0.000 | 1.28 (1.26 ,1.31) | 0.000 |
| Volume of AMI hospitalizations        |             |   |             |   |                         |       |                   |       |                                      |       |                   |       |
| <200                                  |             |   |             |   |                         |       |                   |       | reference                            |       | reference         |       |
| 200-499                               |             |   |             |   |                         |       |                   |       | 0.98 (0.91 ,1.05)                    | 0.55  | 1.04 (1 ,1.09)    | 0.07  |
| 500-999                               |             |   |             |   |                         |       |                   |       | 1.09 (1.02 ,1.16)                    | 0.01  | 1.18 (1.13 ,1.23) | 0.000 |
| 1000-1999                             |             |   |             |   |                         |       |                   |       | 1.12 (1.05 ,1.2)                     | 0.001 | 1.23 (1.17 ,1.29) | 0.000 |
| 2000-                                 |             |   |             |   |                         |       |                   |       | 1.07 (0.98 ,1.18)                    | 0.14  | 1.13 (1.04 ,1.23) | 0.003 |
| Proportion of minority patients (AMI) |             |   |             |   |                         |       |                   |       |                                      |       |                   |       |
| <5%                                   |             |   |             |   |                         |       |                   |       | reference                            |       | reference         |       |
| 5.0-9.9%                              |             |   |             |   |                         |       |                   |       | 1.05 (0.99 ,1.11)                    | 0.09  | 1.01 (0.97 ,1.06) | 0.62  |
| 10.0-24.9                             |             |   |             |   |                         |       |                   |       | 1.17 (1.11 ,1.23)                    | 0.000 | 1.1 (1.05 ,1.15)  | 0.000 |
| 25.0-49.9%                            |             |   |             |   |                         |       |                   |       | 1.05 (0.98 ,1.11)                    | 0.14  | 1.02 (0.97 ,1.08) | 0.40  |
| 50.0%-                                |             |   |             |   |                         |       |                   |       | 1.13 (1.03 ,1.24)                    | 0.007 | 1.03 (0.94 ,1.13) | 0.47  |



|                                         | Unadjusted        |       |                   |       | Patient Characteristics |       |                   |       | Patient and Hospital Characteristics |       |                   |       |
|-----------------------------------------|-------------------|-------|-------------------|-------|-------------------------|-------|-------------------|-------|--------------------------------------|-------|-------------------|-------|
|                                         | STEMI             |       | NSTEMI            |       | STEMI                   |       | NSTEMI            |       | STEMI                                |       | NSTEMI            |       |
|                                         | OR (95% CI)       | P     | OR (95% CI)       | P     | OR (95% CI)             | P     | OR (95% CI)       | P     | OR (95% CI)                          | P     | OR (95% CI)       | P     |
| Disproportionate share percentage (DSH) |                   |       |                   |       |                         |       |                   |       |                                      |       |                   |       |
| 0-9.9%                                  |                   |       |                   |       |                         |       |                   |       | reference                            |       | reference         |       |
| 10.0-24.9%                              |                   |       |                   |       |                         |       |                   |       | 1.02 (0.94 ,1.1)                     | 0.68  | 1.13 (1.05 ,1.21) | 0.00  |
| 25.0-49.9%                              |                   |       |                   |       |                         |       |                   |       | 1.03 (0.95 ,1.12)                    | 0.49  | 1.14 (1.06 ,1.23) | 0.00  |
| 50.0%-                                  |                   |       |                   |       |                         |       |                   |       | 1.03 (0.92 ,1.15)                    | 0.57  | 1.15 (1.04 ,1.27) | 0.01  |
| Resident-to-bed ratio                   |                   |       |                   |       |                         |       |                   |       |                                      |       |                   |       |
| 0                                       |                   |       |                   |       |                         |       |                   |       | reference                            |       | reference         |       |
| >0-0.10                                 |                   |       |                   |       |                         |       |                   |       | 1 (0.96 ,1.05)                       | 0.88  | 1 (0.96 ,1.04)    | 0.90  |
| 0.11-0.20                               |                   |       |                   |       |                         |       |                   |       | 1.01 (0.95 ,1.07)                    | 0.87  | 1.03 (0.98 ,1.08) | 0.29  |
| 0.21-0.40                               |                   |       |                   |       |                         |       |                   |       | 1 (0.94 ,1.06)                       | 0.96  | 0.99 (0.93 ,1.05) | 0.71  |
| 0.41-                                   |                   |       |                   |       |                         |       |                   |       | 1.07 (1 ,1.14)                       | 0.04  | 0.95 (0.9 ,1)     | 0.07  |
| Rurality                                |                   |       |                   |       |                         |       |                   |       |                                      |       |                   |       |
| Rural hospital                          |                   |       |                   |       |                         |       |                   |       | reference                            |       | reference         |       |
| Large urban hospital                    |                   |       |                   |       |                         |       |                   |       | 0.99 (0.92 ,1.07)                    | 0.85  | 1.08 (1.02 ,1.15) | 0.01  |
| Other urban hospital                    |                   |       |                   |       |                         |       |                   |       | 1.05 (0.98 ,1.13)                    | 0.14  | 1.08 (1.01 ,1.14) | 0.02  |
| Time                                    | 1 (1 ,1)          | 0     | 0.99 (0.99 ,1)    | 0.000 | 0.99 (0.99 ,0.99)       | 0.000 | 0.99 (0.99 ,0.99) | 0.000 | 0.99 (0.99 ,0.99)                    | 0.000 | 0.99 (0.99 ,0.99) | 0.000 |
| Admission month                         |                   |       |                   |       |                         |       |                   |       |                                      |       |                   |       |
| January                                 | reference         |       |                   |       | reference               |       |                   |       | reference                            |       | reference         |       |
| February                                | 1.05 (1.01 ,1.09) | 0.02  | 0.97 (0.95 ,0.99) | 0.01  | 1.05 (1 ,1.1)           | 0.05  | 0.98 (0.95 ,1)    | 0.09  | 1.05 (1 ,1.1)                        | 0.05  | 0.98 (0.95 ,1)    | 0.08  |
| March                                   | 1.01 (0.97 ,1.06) | 0.51  | 0.97 (0.95 ,0.99) | 0.01  | 1 (0.95 ,1.05)          | 0.99  | 0.98 (0.96 ,1.01) | 0.16  | 1 (0.95 ,1.05)                       | 0.99  | 0.98 (0.96 ,1.01) | 0.15  |
| April                                   | 1 (0.95 ,1.04)    | 0.83  | 0.94 (0.92 ,0.97) | 0.000 | 1 (0.95 ,1.05)          | 0.85  | 0.96 (0.93 ,0.98) | 0.001 | 1 (0.95 ,1.05)                       | 0.88  | 0.96 (0.93 ,0.98) | 0.002 |
| May                                     | 1.01 (0.97 ,1.06) | 0.54  | 0.92 (0.9 ,0.95)  | 0.000 | 0.99 (0.94 ,1.04)       | 0.78  | 0.93 (0.91 ,0.96) | 0.000 | 0.99 (0.95 ,1.04)                    | 0.80  | 0.93 (0.91 ,0.96) | 0.000 |
| June                                    | 1.01 (0.96 ,1.05) | 0.76  | 0.92 (0.9 ,0.94)  | 0.000 | 1 (0.95 ,1.05)          | 0.95  | 0.93 (0.9 ,0.95)  | 0.000 | 1 (0.95 ,1.06)                       | 0.88  | 0.93 (0.9 ,0.95)  | 0.000 |
| July                                    | 1.01 (0.97 ,1.05) | 0.68  | 0.92 (0.9 ,0.94)  | 0.000 | 0.99 (0.94 ,1.04)       | 0.78  | 0.94 (0.91 ,0.96) | 0.000 | 0.99 (0.95 ,1.05)                    | 0.84  | 0.94 (0.91 ,0.96) | 0.000 |
| August                                  | 0.96 (0.92 ,1.01) | 0.12  | 0.94 (0.92 ,0.96) | 0.000 | 0.94 (0.89 ,0.99)       | 0.02  | 0.96 (0.93 ,0.98) | 0.001 | 0.94 (0.89 ,0.99)                    | 0.02  | 0.96 (0.93 ,0.98) | 0.001 |
| September                               | 1 (0.96 ,1.05)    | 0.97  | 0.95 (0.93 ,0.97) | 0.000 | 0.98 (0.93 ,1.03)       | 0.40  | 0.96 (0.94 ,0.99) | 0.007 | 0.98 (0.93 ,1.03)                    | 0.45  | 0.96 (0.94 ,0.99) | 0.008 |
| October                                 | 1.06 (1.02 ,1.11) | 0.01  | 0.97 (0.95 ,0.99) | 0.02  | 1.07 (1.02 ,1.12)       | 0.01  | 0.99 (0.97 ,1.02) | 0.54  | 1.07 (1.02 ,1.13)                    | 0.01  | 0.99 (0.97 ,1.02) | 0.65  |
| November                                | 1.06 (1.01 ,1.1)  | 0.02  | 0.96 (0.93 ,0.98) | 0.000 | 1.04 (0.99 ,1.09)       | 0.15  | 0.97 (0.95 ,1)    | 0.05  | 1.04 (0.99 ,1.09)                    | 0.12  | 0.97 (0.95 ,1)    | 0.05  |
| December                                | 0.94 (0.9 ,0.99)  | 0.011 | 0.82 (0.8 ,0.84)  | 0.000 | 0.95 (0.9 ,1.01)        | 0.08  | 0.85 (0.83 ,0.88) | 0.000 | 0.96 (0.91 ,1.01)                    | 0.10  | 0.85 (0.83 ,0.88) | 0.000 |
| COVID-19 month                          |                   |       |                   |       |                         |       |                   |       |                                      |       |                   |       |
| March                                   | reference         |       |                   |       | reference               |       |                   |       | reference                            |       | reference         |       |
| April                                   | 0.95 (0.86 ,1.05) | 0.32  | 0.87 (0.82 ,0.93) | 0.000 | 0.96 (0.85 ,1.08)       | 0.48  | 0.88 (0.83 ,0.94) | 0.000 | 0.96 (0.86 ,1.08)                    | 0.49  | 0.89 (0.83 ,0.95) | 0.000 |
| May                                     | 0.87 (0.77 ,0.99) | 0.03  | 0.82 (0.76 ,0.88) | 0.000 | 0.85 (0.73 ,0.98)       | 0.03  | 0.82 (0.76 ,0.89) | 0.000 | 0.86 (0.74 ,0.99)                    | 0.04  | 0.83 (0.77 ,0.9)  | 0.000 |
| June                                    | 0.88 (0.79 ,0.99) | 0.03  | 0.84 (0.79 ,0.89) | 0.000 | 0.84 (0.73 ,0.95)       | 0.01  | 0.83 (0.78 ,0.89) | 0.000 | 0.84 (0.74 ,0.96)                    | 0.01  | 0.84 (0.79 ,0.9)  | 0.000 |
| July                                    | 0.95 (0.85 ,1.06) | 0.35  | 0.86 (0.81 ,0.91) | 0.000 | 0.89 (0.79 ,1.01)       | 0.07  | 0.87 (0.81 ,0.93) | 0.000 | 0.9 (0.79 ,1.02)                     | 0.10  | 0.88 (0.83 ,0.95) | 0.000 |
| August                                  | 0.94 (0.84 ,1.05) | 0.25  | 0.86 (0.81 ,0.92) | 0.000 | 0.95 (0.83 ,1.08)       | 0.42  | 0.84 (0.78 ,0.9)  | 0.000 | 0.96 (0.84 ,1.1)                     | 0.55  | 0.85 (0.79 ,0.92) | 0.000 |
| September                               | 0.94 (0.83 ,1.06) | 0.33  | 0.97 (0.9 ,1.04)  | 0.34  | 0.92 (0.8 ,1.06)        | 0.27  | 0.96 (0.89 ,1.03) | 0.27  | 0.94 (0.81 ,1.08)                    | 0.37  | 0.98 (0.9 ,1.05)  | 0.55  |
| October                                 | 0.97 (0.86 ,1.11) | 0.69  | 0.87 (0.8 ,0.94)  | 0.000 | 0.91 (0.78 ,1.05)       | 0.20  | 0.87 (0.8 ,0.95)  | 0.001 | 0.92 (0.79 ,1.07)                    | 0.26  | 0.89 (0.82 ,0.96) | 0.01  |
| November                                | 0.95 (0.84 ,1.07) | 0.42  | 0.85 (0.79 ,0.92) | 0.000 | 0.88 (0.76 ,1.01)       | 0.07  | 0.86 (0.79 ,0.93) | 0.000 | 0.89 (0.77 ,1.03)                    | 0.11  | 0.87 (0.81 ,0.95) | 0.001 |

**eTable 10. Revascularization with the interaction of race/ethnicity and hospital COVID-19 burden**

|                                                                                                         | Unadjusted        |       |                   |       | Patient Characteristics |       |                   |       | Patient and Hospital Characteristics |       |                   |       |
|---------------------------------------------------------------------------------------------------------|-------------------|-------|-------------------|-------|-------------------------|-------|-------------------|-------|--------------------------------------|-------|-------------------|-------|
|                                                                                                         | STEMI             |       | NSTEMI            |       | STEMI                   |       | NSTEMI            |       | STEMI                                |       | NSTEMI            |       |
|                                                                                                         | OR (95% CI)       | P     | OR (95% CI)       | P     | OR (95% CI)             | P     | OR (95% CI)       | P     | OR (95% CI)                          | P     | OR (95% CI)       | P     |
| <b>eTable 10. Revascularization with the interaction of race/ethnicity and hospital COVID-19 burden</b> |                   |       |                   |       |                         |       |                   |       |                                      |       |                   |       |
| White                                                                                                   | reference         |       |                   |       | reference               |       |                   |       | reference                            |       | reference         |       |
| Black                                                                                                   | 0.56 (0.53 ,0.58) | 0.000 | 0.57 (0.55 ,0.59) | 0.00  | 0.73 (0.69 ,0.77)       | 0.000 | 0.7 (0.67 ,0.73)  | 0.000 | 0.76 (0.72 ,0.8)                     | 0.000 | 0.74 (0.72 ,0.76) | 0.000 |
| Hispanic                                                                                                | 0.64 (0.58 ,0.71) | 0.000 | 0.65 (0.6 ,0.7)   | 0.000 | 0.73 (0.65 ,0.82)       | 0.000 | 0.69 (0.63 ,0.76) | 0.000 | 0.8 (0.74 ,0.88)                     | 0.000 | 0.82 (0.77 ,0.87) | 0.000 |
| Age                                                                                                     |                   |       |                   |       |                         |       |                   |       |                                      |       |                   |       |
| 65-69                                                                                                   | reference         |       |                   |       | reference               |       |                   |       | reference                            |       | reference         |       |
| 70-74                                                                                                   | 0.92 (0.89 ,0.95) | 0.000 | 0.93 (0.92 ,0.94) | 0.000 | 0.9 (0.87 ,0.93)        | 0.000 | 0.91 (0.89 ,0.92) | 0.000 | 0.9 (0.87 ,0.93)                     | 0.000 | 0.91 (0.9 ,0.92)  | 0.000 |
| 75-79                                                                                                   | 0.72 (0.7 ,0.74)  | 0.000 | 0.79 (0.78 ,0.8)  | 0.000 | 0.76 (0.74 ,0.78)       | 0.000 | 0.81 (0.8 ,0.82)  | 0.000 | 0.76 (0.74 ,0.79)                    | 0.000 | 0.81 (0.8 ,0.82)  | 0.000 |
| 80-84                                                                                                   | 0.53 (0.51 ,0.55) | 0.000 | 0.6 (0.59 ,0.61)  | 0.000 | 0.59 (0.57 ,0.61)       | 0.000 | 0.65 (0.64 ,0.66) | 0.000 | 0.59 (0.57 ,0.62)                    | 0.000 | 0.66 (0.65 ,0.67) | 0.000 |
| 85-89                                                                                                   | 0.33 (0.31 ,0.34) | 0.000 | 0.38 (0.37 ,0.39) | 0.000 | 0.38 (0.36 ,0.39)       | 0.000 | 0.43 (0.42 ,0.44) | 0.000 | 0.38 (0.37 ,0.4)                     | 0.000 | 0.44 (0.43 ,0.45) | 0.000 |
| 90-94                                                                                                   | 0.17 (0.16 ,0.17) | 0.000 | 0.17 (0.17 ,0.18) | 0.000 | 0.19 (0.18 ,0.2)        | 0.000 | 0.2 (0.2 ,0.21)   | 0.000 | 0.2 (0.19 ,0.21)                     | 0.000 | 0.21 (0.2 ,0.22)  | 0.000 |
| 95-                                                                                                     | 0.07 (0.07 ,0.08) | 0.000 | 0.06 (0.05 ,0.06) | 0.000 | 0.09 (0.08 ,0.09)       | 0.000 | 0.07 (0.07 ,0.08) | 0.000 | 0.09 (0.08 ,0.1)                     | 0.000 | 0.08 (0.07 ,0.08) | 0.000 |
| Hospital Covid-19 burden                                                                                |                   |       |                   |       |                         |       |                   |       |                                      |       |                   |       |
| Before Covid-19                                                                                         | reference         |       |                   |       | reference               |       |                   |       | reference                            |       | reference         |       |
| 0.0-2.0%                                                                                                | 0.92 (0.86 ,0.99) | 0.02  | 0.98 (0.95 ,1.01) | 0.13  | 0.94 (0.87 ,1.01)       | 0.09  | 0.99 (0.96 ,1.02) | 0.36  | 0.95 (0.89 ,1.02)                    | 0.19  | 0.99 (0.96 ,1.02) | 0.47  |
| 2.1-10.0%                                                                                               | 0.97 (0.87 ,1.08) | 0.56  | 0.97 (0.92 ,1.03) | 0.33  | 1.03 (0.92 ,1.15)       | 0.63  | 1.01 (0.96 ,1.07) | 0.70  | 1 (0.89 ,1.12)                       | 1.00  | 0.94 (0.89 ,0.99) | 0.03  |
| 10.1-20.0%                                                                                              | 0.89 (0.78 ,1.02) | 0.09  | 0.88 (0.82 ,0.95) | 0.001 | 0.93 (0.81 ,1.08)       | 0.35  | 0.95 (0.88 ,1.02) | 0.18  | 0.93 (0.81 ,1.08)                    | 0.36  | 0.95 (0.88 ,1.02) | 0.13  |
| 20.1-30.0%                                                                                              | 0.9 (0.73 ,1.1)   | 0.30  | 0.83 (0.75 ,0.91) | 0.000 | 1 (0.8 ,1.25)           | 0.99  | 0.91 (0.82 ,1)    | 0.05  | 1.03 (0.82 ,1.3)                     | 0.78  | 0.94 (0.85 ,1.04) | 0.20  |
| 30.1%-                                                                                                  | 0.84 (0.63 ,1.1)  | 0.21  | 0.65 (0.56 ,0.76) | 0.000 | 0.86 (0.64 ,1.17)       | 0.34  | 0.73 (0.63 ,0.84) | 0.000 | 0.97 (0.72 ,1.3)                     | 0.83  | 0.84 (0.73 ,0.98) | 0.03  |
| COVID Burden X Race                                                                                     |                   |       |                   |       |                         |       |                   |       |                                      |       |                   |       |
| 0.0-2.0% X Black                                                                                        | 0.98 (0.84 ,1.14) | 0.78  | 0.94 (0.88 ,1)    | 0.04  | 0.99 (0.84 ,1.16)       | 0.88  | 0.94 (0.88 ,1)    | 0.05  | 0.99 (0.84 ,1.17)                    | 0.93  | 0.91 (0.86 ,0.97) | 0.005 |
| 2.1-10% X Black                                                                                         | 0.91 (0.77 ,1.09) | 0.33  | 0.92 (0.86 ,0.99) | 0.03  | 0.92 (0.76 ,1.13)       | 0.43  | 0.95 (0.88 ,1.02) | 0.15  | 0.92 (0.76 ,1.13)                    | 0.43  | 0.94 (0.87 ,1.02) | 0.12  |
| 10.1-20% X Black                                                                                        | 0.94 (0.73 ,1.22) | 0.65  | 0.94 (0.84 ,1.05) | 0.28  | 0.98 (0.75 ,1.3)        | 0.91  | 0.94 (0.83 ,1.06) | 0.32  | 1.02 (0.76 ,1.35)                    | 0.91  | 0.95 (0.84 ,1.08) | 0.44  |
| 20.1-30% X Black                                                                                        | 0.97 (0.61 ,1.54) | 0.89  | 1.04 (0.84 ,1.29) | 0.74  | 1.2 (0.75 ,1.94)        | 0.45  | 1.04 (0.83 ,1.3)  | 0.73  | 1.22 (0.74 ,2.01)                    | 0.43  | 1.09 (0.87 ,1.37) | 0.47  |
| 30.1%- X Black                                                                                          | 1.14 (0.57 ,2.28) | 0.70  | 1.08 (0.77 ,1.52) | 0.67  | 1.23 (0.58 ,2.6)        | 0.59  | 1.09 (0.76 ,1.57) | 0.63  | 1.18 (0.55 ,2.52)                    | 0.67  | 1.15 (0.78 ,1.69) | 0.48  |
| 0.0-2.0% X Hispanic                                                                                     | 0.93 (0.8 ,1.07)  | 0.31  | 0.83 (0.77 ,0.9)  | 0.00  | 0.92 (0.79 ,1.08)       | 0.31  | 0.82 (0.76 ,0.89) | 0.000 | 0.91 (0.78 ,1.06)                    | 0.22  | 0.84 (0.78 ,0.91) | 0.000 |
| 2.1-10% X Hispanic                                                                                      | 1.15 (0.97 ,1.37) | 0.11  | 1.05 (0.97 ,1.14) | 0.25  | 1.27 (1.04 ,1.54)       | 0.02  | 1.11 (1.01 ,1.22) | 0.03  | 1.24 (1.02 ,1.5)                     | 0.03  | 1.07 (0.98 ,1.18) | 0.14  |
| 10.1-20% X Hispanic                                                                                     | 1.24 (0.93 ,1.65) | 0.14  | 1.08 (0.93 ,1.24) | 0.32  | 1.26 (0.91 ,1.74)       | 0.17  | 1.11 (0.95 ,1.29) | 0.19  | 1.25 (0.9 ,1.72)                     | 0.18  | 1.1 (0.95 ,1.28)  | 0.22  |
| 20.1-30% X Hispanic                                                                                     | 1.52 (0.92 ,2.51) | 0.10  | 0.99 (0.79 ,1.24) | 0.93  | 1.71 (0.96 ,3.06)       | 0.07  | 1.05 (0.83 ,1.33) | 0.71  | 1.56 (0.86 ,2.83)                    | 0.15  | 1.1 (0.85 ,1.41)  | 0.48  |
| 30.1%- X Hispanic                                                                                       | 0.94 (0.58 ,1.53) | 0.80  | 0.84 (0.63 ,1.14) | 0.26  | 1.23 (0.71 ,2.11)       | 0.46  | 0.96 (0.71 ,1.3)  | 0.79  | 1.13 (0.66 ,1.94)                    | 0.65  | 0.87 (0.63 ,1.19) | 0.38  |
| Sex                                                                                                     |                   |       |                   |       |                         |       |                   |       |                                      |       |                   |       |
| Male                                                                                                    |                   |       |                   |       | reference               |       |                   |       | reference                            |       | reference         |       |
| Female                                                                                                  |                   |       |                   |       | 0.72 (0.71 ,0.74)       | 0.000 | 0.67 (0.66 ,0.67) | 0.000 | 0.72 (0.71 ,0.74)                    | 0.000 | 0.67 (0.66 ,0.67) | 0.000 |
| Urgency                                                                                                 |                   |       |                   |       |                         |       |                   |       |                                      |       |                   |       |
| Urgent                                                                                                  |                   |       |                   |       | 0.92 (0.87 ,0.97)       | 0.004 | 1.09 (1.03 ,1.16) | 0.005 | 0.91 (0.86 ,0.96)                    | 0.001 | 1.1 (1.03 ,1.16)  | 0.002 |
| Emergent                                                                                                |                   |       |                   |       | reference               |       |                   |       | reference                            |       | reference         |       |

|                                | Unadjusted  |   |             |   | Patient Characteristics |       |                   |       | Patient and Hospital Characteristics |       |                   |       |
|--------------------------------|-------------|---|-------------|---|-------------------------|-------|-------------------|-------|--------------------------------------|-------|-------------------|-------|
|                                | STEMI       |   | NSTEMI      |   | STEMI                   |       | NSTEMI            |       | STEMI                                |       | NSTEMI            |       |
|                                | OR (95% CI) | P | OR (95% CI) | P | OR (95% CI)             | P     | OR (95% CI)       | P     | OR (95% CI)                          | P     | OR (95% CI)       | P     |
| Admission source               |             |   |             |   |                         |       |                   |       |                                      |       |                   |       |
| Community                      |             |   |             |   | reference               |       |                   |       | reference                            |       | reference         |       |
| Hospital                       |             |   |             |   | 0.91 (0.86, 0.97)       | 0.004 | 1.67 (1.58, 1.75) | 0.000 | 0.84 (0.8, 0.89)                     | 0.000 | 1.33 (1.27, 1.4)  | 0.000 |
| SNF/Nursing Home               |             |   |             |   | 0.39 (0.35, 0.43)       | 0.000 | 0.45 (0.42, 0.48) | 0.000 | 0.39 (0.35, 0.43)                    | 0.000 | 0.45 (0.42, 0.48) | 0.000 |
| Other                          |             |   |             |   | 0.9 (0.81, 1)           | 0.05  | 1.32 (1.23, 1.41) | 0.000 | 0.87 (0.78, 0.97)                    | 0.01  | 1.16 (1.08, 1.25) | 0.000 |
| Dual-eligible                  |             |   |             |   | 0.77 (0.74, 0.8)        | 0.000 | 0.77 (0.75, 0.79) | 0.000 | 0.78 (0.76, 0.81)                    | 0.000 | 0.8 (0.78, 0.81)  | 0.000 |
| Body Mass Index                |             |   |             |   |                         |       |                   |       |                                      |       |                   |       |
| Underweight                    |             |   |             |   | 0.59 (0.54, 0.65)       | 0.000 | 0.63 (0.6, 0.67)  | 0.000 | 0.58 (0.53, 0.64)                    | 0.00  | 0.61 (0.58, 0.65) | 0.000 |
| Morbid obesity                 |             |   |             |   | 1.01 (0.95, 1.08)       | 0.693 | 1.03 (1, 1.05)    | 0.046 | 1.01 (0.94, 1.08)                    | 0.78  | 1.02 (0.99, 1.04) | 0.12  |
| Myocardial infarction location |             |   |             |   |                         |       |                   |       |                                      |       |                   |       |
| Inferior wall                  |             |   |             |   | reference               |       | NA                |       | reference                            |       | NA                |       |
| Anterior wall                  |             |   |             |   | 0.99 (0.96, 1.01)       | 0.31  | NA                |       | 0.99 (0.97, 1.02)                    | 0.67  | NA                |       |
| Lateral wall                   |             |   |             |   | 0.69 (0.65, 0.73)       | 0.000 | NA                |       | 0.7 (0.66, 0.74)                     | 0.000 | NA                |       |
| Unspecified                    |             |   |             |   | 0.24 (0.23, 0.25)       | 0.000 | NA                |       | 0.25 (0.24, 0.26)                    | 0.000 | NA                |       |
| Congestive heart failure       |             |   |             |   |                         |       |                   |       |                                      |       |                   |       |
| Systolic                       |             |   |             |   | 0.86 (0.83, 0.89)       | 0.000 | 0.8 (0.79, 0.82)  | 0.000 | 0.86 (0.83, 0.89)                    | 0.000 | 0.78 (0.76, 0.79) | 0.000 |
| Diastolic                      |             |   |             |   | 0.84 (0.8, 0.88)        | 0.000 | 0.76 (0.74, 0.78) | 0.000 | 0.84 (0.8, 0.88)                     | 0.000 | 0.75 (0.73, 0.76) | 0.000 |
| Systolic & Diastolic           |             |   |             |   | 0.82 (0.78, 0.87)       | 0.000 | 0.81 (0.79, 0.83) | 0.000 | 0.82 (0.78, 0.87)                    | 0.000 | 0.79 (0.77, 0.82) | 0.000 |
| Unspecified                    |             |   |             |   | 0.63 (0.6, 0.66)        | 0.000 | 0.66 (0.64, 0.68) | 0.000 | 0.65 (0.62, 0.68)                    | 0.000 | 0.69 (0.67, 0.71) | 0.000 |
| Right heart failure            |             |   |             |   | 0.83 (0.68, 1.02)       | 0.08  | 0.84 (0.74, 0.96) | 0.000 | 0.83 (0.68, 1.03)                    | 0.088 | 0.84 (0.74, 0.96) | 0.01  |
| Biventricular heart failure    |             |   |             |   | 0.73 (0.59, 0.9)        | 0.004 | 0.85 (0.75, 0.96) | 0.008 | 0.71 (0.57, 0.88)                    | 0.002 | 0.8 (0.71, 0.91)  | 0.001 |
| End-stage heart failure        |             |   |             |   | 0.54 (0.37, 0.78)       | 0.001 | 0.65 (0.55, 0.76) | 0.011 | 0.54 (0.37, 0.78)                    | 0.001 | 0.63 (0.54, 0.74) | 0.000 |
| Complications of AMI           |             |   |             |   |                         |       |                   |       |                                      |       |                   |       |
| Ventricular septal defect      |             |   |             |   | 0.6 (0.5, 0.7)          | 0.000 | 1 (0.6, 1.5)      | 0.84  | 0.6 (0.5, 0.7)                       | 0.000 | 0.9 (0.5, 1.4)    | 0.56  |
| LV rupture                     |             |   |             |   | 0.5 (0.4, 0.6)          | 0.000 | 1.1 (0.7, 1.7)    | 0.64  | 0.5 (0.3, 0.6)                       | 0.000 | 1.1 (0.7, 1.8)    | 0.72  |
| Papillary muscle rupture       |             |   |             |   | 0.9 (0.5, 1.4)          | 0.56  | 1.8 (1.2, 2.8)    | 0.005 | 0.8 (0.5, 1.3)                       | 0.48  | 1.7 (1.1, 2.7)    | 0.02  |
| Prior procedures               |             |   |             |   |                         |       |                   |       |                                      |       |                   |       |
| PCI                            |             |   |             |   | 0.92 (0.89, 0.96)       | 0.000 | 1.01 (0.99, 1.03) | 0.50  | 0.92 (0.89, 0.96)                    | 0.000 | 0.99 (0.97, 1)    | 0.14  |
| CABG                           |             |   |             |   | 0.45 (0.43, 0.47)       | 0.000 | 0.6 (0.59, 0.61)  | 0.000 | 0.44 (0.42, 0.46)                    | 0.000 | 0.58 (0.57, 0.59) | 0.000 |
| Heart valve surgery            |             |   |             |   | 0.66 (0.6, 0.72)        | 0.000 | 0.72 (0.7, 0.75)  | 0.000 | 0.66 (0.6, 0.72)                     | 0.000 | 0.7 (0.68, 0.73)  | 0.000 |
| Dialysis                       |             |   |             |   | 0.55 (0.51, 0.6)        | 0.000 | 0.86 (0.83, 0.88) | 0.000 | 0.55 (0.51, 0.6)                     | 0.000 | 0.86 (0.83, 0.88) | 0.000 |
| AICD                           |             |   |             |   | 0.53 (0.48, 0.58)       | 0.000 | 0.68 (0.66, 0.7)  | 0.000 | 0.53 (0.48, 0.58)                    | 0.000 | 0.67 (0.65, 0.69) | 0.000 |
| COVID                          |             |   |             |   | 0.55 (0.44, 0.7)        | 0.000 | 0.43 (0.37, 0.49) | 0.000 | 0.55 (0.43, 0.69)                    | 0.000 | 0.42 (0.36, 0.48) | 0.000 |
| Functional Status              |             |   |             |   |                         |       |                   |       |                                      |       |                   |       |
| Wheel-chair                    |             |   |             |   | 0.51 (0.43, 0.6)        | 0.000 | 0.59 (0.55, 0.64) | 0.000 | 0.51 (0.43, 0.6)                     | 0.000 | 0.57 (0.53, 0.62) | 0.000 |
| Supplemental oxygen            |             |   |             |   | 0.67 (0.62, 0.72)       | 0.000 | 0.7 (0.68, 0.72)  | 0.000 | 0.68 (0.63, 0.73)                    | 0.000 | 0.71 (0.69, 0.73) | 0.000 |
| Dependent on provider          |             |   |             |   | 0.32 (0.26, 0.38)       | 0.000 | 0.35 (0.31, 0.4)  | 0.000 | 0.33 (0.27, 0.39)                    | 0.000 | 0.36 (0.32, 0.41) | 0.000 |
| Elixhauser comorbidities       |             |   |             |   |                         |       |                   |       |                                      |       |                   |       |
| Cardiac arrhythmias            |             |   |             |   | 0.88 (0.86, 0.9)        | 0.000 | 0.8 (0.79, 0.81)  | 0.000 | 0.87 (0.85, 0.89)                    | 0.000 | 0.78 (0.77, 0.79) | 0.000 |
| Valvular heart disease         |             |   |             |   | 0.89 (0.86, 0.92)       | 0.000 | 0.98 (0.97, 1)    | 0.04  | 0.87 (0.84, 0.9)                     | 0.000 | 0.94 (0.93, 0.96) | 0.000 |
| Pulmonary circulation          |             |   |             |   | 0.77 (0.73, 0.81)       | 0.000 | 0.84 (0.82, 0.86) | 0.000 | 0.76 (0.73, 0.8)                     | 0.000 | 0.83 (0.81, 0.85) | 0.000 |
| Peripheral vascular disorder   |             |   |             |   | 0.85 (0.81, 0.88)       | 0.000 | 1.05 (1.03, 1.08) | 0.000 | 0.83 (0.8, 0.87)                     | 0.000 | 1.03 (1, 1.05)    | 0.03  |

|                                       | Unadjusted  |   |             |   | Patient Characteristics |       |                   |       | Patient and Hospital Characteristics |       |                   |       |
|---------------------------------------|-------------|---|-------------|---|-------------------------|-------|-------------------|-------|--------------------------------------|-------|-------------------|-------|
|                                       | STEMI       |   | NSTEMI      |   | STEMI                   |       | NSTEMI            |       | STEMI                                |       | NSTEMI            |       |
|                                       | OR (95% CI) | P | OR (95% CI) | P | OR (95% CI)             | P     | OR (95% CI)       | P     | OR (95% CI)                          | P     | OR (95% CI)       | P     |
| Hypertension, uncomplicated           |             |   |             |   | 1.11 (1.08 ,1.14)       | 0.000 | 1.18 (1.16 ,1.2)  | 0.000 | 1.1 (1.06 ,1.13)                     | 0.000 | 1.16 (1.14 ,1.18) | 0.000 |
| Hypertension, complicated             |             |   |             |   | 1.1 (1.06 ,1.14)        | 0.000 | 1.2 (1.17 ,1.23)  | 0.000 | 1.08 (1.04 ,1.12)                    | 0.000 | 1.17 (1.14 ,1.19) | 0.000 |
| Paralysis                             |             |   |             |   | 0.65 (0.56 ,0.74)       | 0.000 | 0.77 (0.72 ,0.83) | 0.000 | 0.64 (0.56 ,0.74)                    | 0.000 | 0.75 (0.7 ,0.81)  | 0.000 |
| Neurologic disorder, other            |             |   |             |   | 0.48 (0.47 ,0.5)        | 0.000 | 0.58 (0.56 ,0.59) | 0.000 | 0.48 (0.46 ,0.5)                     | 0.000 | 0.57 (0.56 ,0.58) | 0.000 |
| Chronic pulmonary disease             |             |   |             |   | 0.86 (0.84 ,0.88)       | 0.000 | 0.84 (0.83 ,0.85) | 0.000 | 0.86 (0.84 ,0.89)                    | 0.000 | 0.84 (0.83 ,0.85) | 0.000 |
| Diabetes, uncomplicated               |             |   |             |   | 0.9 (0.88 ,0.93)        | 0.000 | 0.98 (0.97 ,1)    | 0.01  | 0.91 (0.88 ,0.94)                    | 0.000 | 1 (0.98 ,1.01)    | 0.83  |
| Diabetes, complicated                 |             |   |             |   | 0.93 (0.9 ,0.96)        | 0.000 | 1.08 (1.07 ,1.1)  | 0.000 | 0.92 (0.89 ,0.95)                    | 0.000 | 1.07 (1.06 ,1.09) | 0.000 |
| Hypothyroidism                        |             |   |             |   | 0.99 (0.96 ,1.02)       | 0.33  | 0.99 (0.97 ,1)    | 0.03  | 0.98 (0.95 ,1.01)                    | 0.22  | 0.98 (0.97 ,0.99) | 0.001 |
| Renal failure                         |             |   |             |   | 0.84 (0.81 ,0.87)       | 0.00  | 0.81 (0.8 ,0.83)  | 0.000 | 0.85 (0.82 ,0.88)                    | 0.000 | 0.81 (0.79 ,0.82) | 0.000 |
| Liver disease                         |             |   |             |   | 0.72 (0.69 ,0.77)       | 0.00  | 0.75 (0.72 ,0.77) | 0.000 | 0.72 (0.68 ,0.76)                    | 0.000 | 0.73 (0.7 ,0.75)  | 0.000 |
| Peptic ulcer disease                  |             |   |             |   | 1.02 (0.87 ,1.18)       | 0.83  | 0.85 (0.81 ,0.9)  | 0.000 | 1.02 (0.87 ,1.19)                    | 0.80  | 0.83 (0.79 ,0.87) | 0.000 |
| AIDS/HIV                              |             |   |             |   | 1.2 (0.79 ,1.83)        | 0.40  | 1.01 (0.85 ,1.2)  | 0.93  | 1.24 (0.8 ,1.91)                     | 0.33  | 0.98 (0.82 ,1.16) | 0.80  |
| Lymphoma                              |             |   |             |   | 0.76 (0.67 ,0.87)       | 0.000 | 0.71 (0.67 ,0.74) | 0.000 | 0.75 (0.66 ,0.86)                    | 0.000 | 0.68 (0.65 ,0.72) | 0.000 |
| Metastatic cancer                     |             |   |             |   | 0.42 (0.39 ,0.46)       | 0.000 | 0.49 (0.47 ,0.51) | 0.000 | 0.42 (0.38 ,0.46)                    | 0.000 | 0.48 (0.46 ,0.5)  | 0.000 |
| Solid tumor                           |             |   |             |   | 0.65 (0.61 ,0.69)       | 0.000 | 0.69 (0.67 ,0.71) | 0.000 | 0.65 (0.61 ,0.69)                    | 0.000 | 0.68 (0.66 ,0.7)  | 0.000 |
| Rheumatoid arthritis                  |             |   |             |   | 1.06 (1 ,1.13)          | 0.05  | 1 (0.98 ,1.02)    | 0.95  | 1.06 (1 ,1.13)                       | 0.049 | 0.98 (0.95 ,1)    | 0.07  |
| Coagulopathy                          |             |   |             |   | 0.88 (0.84 ,0.93)       | 0.000 | 1.01 (0.98 ,1.03) | 0.53  | 0.87 (0.83 ,0.92)                    | 0.000 | 0.98 (0.96 ,1.01) | 0.20  |
| Weight loss                           |             |   |             |   | 0.68 (0.64 ,0.73)       | 0.000 | 0.71 (0.68 ,0.74) | 0.000 | 0.69 (0.64 ,0.74)                    | 0.000 | 0.71 (0.69 ,0.74) | 0.000 |
| Fluid and electrolyte disorder        |             |   |             |   | 0.64 (0.62 ,0.65)       | 0.000 | 0.7 (0.69 ,0.71)  | 0.000 | 0.64 (0.62 ,0.66)                    | 0.000 | 0.7 (0.69 ,0.71)  | 0.000 |
| Anemia, blood loss                    |             |   |             |   | 0.77 (0.67 ,0.88)       | 0.000 | 0.76 (0.72 ,0.81) | 0.000 | 0.79 (0.69 ,0.91)                    | 0.001 | 0.76 (0.72 ,0.81) | 0.000 |
| Anemia, deficiency                    |             |   |             |   | 0.89 (0.83 ,0.95)       | 0.000 | 0.85 (0.83 ,0.88) | 0.000 | 0.89 (0.83 ,0.95)                    | 0.001 | 0.84 (0.82 ,0.87) | 0.000 |
| Alcohol abuse                         |             |   |             |   | 0.8 (0.74 ,0.86)        | 0.000 | 0.8 (0.78 ,0.83)  | 0.000 | 0.79 (0.73 ,0.86)                    | 0.000 | 0.81 (0.78 ,0.83) | 0.000 |
| Drug abuse                            |             |   |             |   | 0.91 (0.83 ,1)          | 0.06  | 0.8 (0.76 ,0.83)  | 0.000 | 0.91 (0.83 ,1)                       | 0.06  | 0.8 (0.76 ,0.83)  | 0.000 |
| Psychoses                             |             |   |             |   | 0.47 (0.41 ,0.53)       | 0.000 | 0.48 (0.44 ,0.51) | 0.000 | 0.48 (0.41 ,0.55)                    | 0.000 | 0.49 (0.45 ,0.52) | 0.000 |
| Depression                            |             |   |             |   | 0.84 (0.81 ,0.87)       | 0.000 | 0.9 (0.88 ,0.92)  | 0.000 | 0.83 (0.8 ,0.87)                     | 0.000 | 0.88 (0.87 ,0.9)  | 0.000 |
| Volume of AMI hospitalizations        |             |   |             |   |                         |       |                   |       |                                      |       |                   |       |
| <200                                  |             |   |             |   |                         |       |                   |       | reference                            |       | reference         |       |
| 200-499                               |             |   |             |   |                         |       |                   |       | 2.52 (2.23 ,2.84)                    | 0.000 | 3.14 (2.75 ,3.59) | 0.000 |
| 500-999                               |             |   |             |   |                         |       |                   |       | 3.07 (2.73 ,3.44)                    | 0.000 | 4.63 (4.09 ,5.26) | 0.000 |
| 1000-1999                             |             |   |             |   |                         |       |                   |       | 3.18 (2.83 ,3.59)                    | 0.000 | 5.37 (4.72 ,6.11) | 0.000 |
| 2000-                                 |             |   |             |   |                         |       |                   |       | 2.96 (2.52 ,3.47)                    | 0.000 | 5.43 (4.66 ,6.34) | 0.000 |
| Proportion of minority patients (AMI) |             |   |             |   |                         |       |                   |       |                                      |       |                   |       |
| <5%                                   |             |   |             |   |                         |       |                   |       | reference                            |       | reference         |       |
| 5.0-9.9%                              |             |   |             |   |                         |       |                   |       | 1 (0.93 ,1.07)                       | 0.93  | 0.98 (0.9 ,1.05)  | 0.52  |
| 10.0-24.9                             |             |   |             |   |                         |       |                   |       | 1 (0.93 ,1.07)                       | 0.98  | 1.05 (0.98 ,1.13) | 0.20  |
| 25.0-49.9%                            |             |   |             |   |                         |       |                   |       | 0.96 (0.88 ,1.05)                    | 0.35  | 0.98 (0.89 ,1.06) | 0.57  |
| 50.0%-                                |             |   |             |   |                         |       |                   |       | 0.7 (0.58 ,0.83)                     | 0.000 | 0.65 (0.55 ,0.76) | 0.000 |

|                                         | Unadjusted        |       |                   |       | Patient Characteristics |       |                   |       | Patient and Hospital Characteristics |       |                   |       |
|-----------------------------------------|-------------------|-------|-------------------|-------|-------------------------|-------|-------------------|-------|--------------------------------------|-------|-------------------|-------|
|                                         | STEMI             |       | NSTEMI            |       | STEMI                   |       | NSTEMI            |       | STEMI                                |       | NSTEMI            |       |
|                                         | OR (95% CI)       | P     | OR (95% CI)       | P     | OR (95% CI)             | P     | OR (95% CI)       | P     | OR (95% CI)                          | P     | OR (95% CI)       | P     |
| Disproportionate share percentage (DSH) |                   |       |                   |       |                         |       |                   |       |                                      |       |                   |       |
| 0-9.9%                                  |                   |       |                   |       |                         |       |                   |       | reference                            |       | reference         |       |
| 10.0-24.9%                              |                   |       |                   |       |                         |       |                   |       | 1.01 (0.91 ,1.12)                    | 0.88  | 1 (0.88 ,1.13)    | 0.96  |
| 25.0-49.9%                              |                   |       |                   |       |                         |       |                   |       | 1.05 (0.94 ,1.17)                    | 0.39  | 1.01 (0.89 ,1.16) | 0.84  |
| 50.0%-                                  |                   |       |                   |       |                         |       |                   |       | 1.32 (1.12 ,1.54)                    | 0.00  | 1.17 (0.99 ,1.4)  | 0.07  |
| Resident-to-bed ratio                   |                   |       |                   |       |                         |       |                   |       |                                      |       |                   |       |
| 0                                       |                   |       |                   |       |                         |       |                   |       | reference                            |       | reference         |       |
| >0-0.10                                 |                   |       |                   |       |                         |       |                   |       | 0.97 (0.91 ,1.04)                    | 0.41  | 1.05 (0.98 ,1.12) | 0.14  |
| 0.11-0.20                               |                   |       |                   |       |                         |       |                   |       | 1.05 (0.97 ,1.13)                    | 0.25  | 1.09 (1 ,1.18)    | 0.04  |
| 0.21-0.40                               |                   |       |                   |       |                         |       |                   |       | 0.95 (0.87 ,1.04)                    | 0.29  | 1.04 (0.95 ,1.15) | 0.38  |
| 0.41-                                   |                   |       |                   |       |                         |       |                   |       | 0.94 (0.85 ,1.03)                    | 0.19  | 1.2 (1.1 ,1.32)   | 0.000 |
| Rurality                                |                   |       |                   |       |                         |       |                   |       |                                      |       |                   |       |
| Rural hospital                          |                   |       |                   |       |                         |       |                   |       | reference                            |       | reference         |       |
| Large urban hospital                    |                   |       |                   |       |                         |       |                   |       | 1.1 (1 ,1.22)                        | 0.046 | 1.16 (1.04 ,1.29) | 0.008 |
| Other urban hospital                    |                   |       |                   |       |                         |       |                   |       | 1.1 (1 ,1.21)                        | 0.048 | 1.21 (1.09 ,1.34) | 0.000 |
| Time                                    | 1.01 (1.01 ,1.01) | 0     | 1.01 (1.01 ,1.01) | 0.000 | 1.01 (1.01 ,1.01)       | 0.000 | 1.01 (1.01 ,1.01) | 0.000 | 1.01 (1.01 ,1.01)                    | 0.000 | 1.01 (1 ,1.01)    | 0.000 |
| Admission month                         |                   |       |                   |       |                         |       |                   |       |                                      |       |                   |       |
| January                                 | reference         |       |                   |       | reference               |       |                   |       | reference                            |       | reference         |       |
| February                                | 0.99 (0.94 ,1.03) | 0.56  | 1 (0.98 ,1.02)    | 0.77  | 1.01 (0.96 ,1.06)       | 0.83  | 1 (0.98 ,1.02)    | 0.98  | 1.01 (0.96 ,1.06)                    | 0.77  | 1 (0.98 ,1.02)    | 0.69  |
| March                                   | 0.99 (0.95 ,1.04) | 0.73  | 1.02 (1 ,1.05)    | 0.03  | 1.01 (0.96 ,1.07)       | 0.67  | 1.02 (1 ,1.04)    | 0.08  | 1.01 (0.96 ,1.07)                    | 0.59  | 1.01 (0.99 ,1.03) | 0.31  |
| April                                   | 1.01 (0.96 ,1.06) | 0.79  | 1.04 (1.01 ,1.06) | 0.001 | 1.01 (0.96 ,1.06)       | 0.78  | 1.02 (1 ,1.05)    | 0.03  | 1.01 (0.96 ,1.07)                    | 0.69  | 1.02 (0.99 ,1.04) | 0.14  |
| May                                     | 0.96 (0.91 ,1.01) | 0.09  | 1.04 (1.02 ,1.07) | 0.000 | 0.97 (0.92 ,1.02)       | 0.26  | 1.03 (1.01 ,1.05) | 0.005 | 0.97 (0.92 ,1.02)                    | 0.27  | 1.02 (1 ,1.04)    | 0.06  |
| June                                    | 0.96 (0.91 ,1.01) | 0.09  | 1.02 (1 ,1.05)    | 0.025 | 0.97 (0.92 ,1.02)       | 0.23  | 1.01 (0.99 ,1.04) | 0.24  | 0.97 (0.92 ,1.02)                    | 0.29  | 1 (0.98 ,1.02)    | 0.98  |
| July                                    | 0.96 (0.91 ,1)    | 0.08  | 1.01 (0.99 ,1.03) | 0.418 | 0.97 (0.92 ,1.02)       | 0.30  | 0.99 (0.97 ,1.02) | 0.63  | 0.98 (0.93 ,1.03)                    | 0.36  | 0.98 (0.96 ,1.01) | 0.16  |
| August                                  | 0.94 (0.9 ,0.99)  | 0.02  | 1.01 (0.99 ,1.03) | 0.396 | 0.96 (0.91 ,1.01)       | 0.12  | 1 (0.98 ,1.02)    | 0.99  | 0.96 (0.91 ,1.01)                    | 0.15  | 0.99 (0.97 ,1.01) | 0.44  |
| September                               | 0.9 (0.86 ,0.95)  | 0.00  | 0.98 (0.96 ,1)    | 0.037 | 0.92 (0.87 ,0.97)       | 0.00  | 0.97 (0.95 ,0.99) | 0.006 | 0.92 (0.87 ,0.97)                    | 0.00  | 0.96 (0.94 ,0.98) | 0.000 |
| October                                 | 0.96 (0.91 ,1)    | 0.07  | 1 (0.98 ,1.02)    | 0.92  | 0.96 (0.91 ,1.01)       | 0.15  | 0.99 (0.97 ,1.01) | 0.38  | 0.96 (0.91 ,1.02)                    | 0.19  | 0.99 (0.96 ,1.01) | 0.25  |
| November                                | 0.92 (0.88 ,0.97) | 0.00  | 0.99 (0.96 ,1.01) | 0.17  | 0.94 (0.89 ,0.99)       | 0.02  | 0.98 (0.96 ,1)    | 0.051 | 0.95 (0.9 ,1)                        | 0.04  | 0.97 (0.95 ,1)    | 0.02  |
| December                                | 0.91 (0.86 ,0.95) | 0.000 | 0.9 (0.88 ,0.92)  | 0.00  | 0.9 (0.85 ,0.95)        | 0.000 | 0.87 (0.85 ,0.89) | 0.000 | 0.91 (0.86 ,0.96)                    | 0.000 | 0.87 (0.85 ,0.89) | 0.000 |
| COVID-19 month                          |                   |       |                   |       |                         |       |                   |       |                                      |       |                   |       |
| March                                   | reference         |       |                   |       | reference               |       |                   |       | reference                            |       | reference         |       |
| April                                   | 0.98 (0.88 ,1.09) | 0.67  | 0.98 (0.94 ,1.03) | 0.495 | 0.94 (0.83 ,1.05)       | 0.28  | 0.96 (0.91 ,1.01) | 0.12  | 0.94 (0.83 ,1.05)                    | 0.27  | 0.97 (0.92 ,1.02) | 0.27  |
| May                                     | 0.97 (0.85 ,1.1)  | 0.59  | 1.11 (1.04 ,1.18) | 0.001 | 0.92 (0.8 ,1.05)        | 0.22  | 1.08 (1.01 ,1.15) | 0.03  | 0.93 (0.81 ,1.07)                    | 0.31  | 1.11 (1.04 ,1.18) | 0.00  |
| June                                    | 0.99 (0.88 ,1.12) | 0.87  | 1.05 (1 ,1.11)    | 0.063 | 1 (0.87 ,1.13)          | 0.95  | 1.04 (0.98 ,1.1)  | 0.22  | 1.02 (0.89 ,1.16)                    | 0.81  | 1.07 (1.02 ,1.14) | 0.01  |
| July                                    | 1 (0.89 ,1.12)    | 0.98  | 1.04 (0.99 ,1.1)  | 0.14  | 1 (0.89 ,1.14)          | 0.95  | 1.02 (0.97 ,1.08) | 0.46  | 1.02 (0.9 ,1.16)                     | 0.72  | 1.07 (1.01 ,1.13) | 0.01  |
| August                                  | 0.99 (0.87 ,1.12) | 0.85  | 1.01 (0.95 ,1.08) | 0.69  | 0.97 (0.85 ,1.12)       | 0.71  | 1 (0.94 ,1.07)    | 0.95  | 0.99 (0.86 ,1.14)                    | 0.92  | 1.04 (0.98 ,1.11) | 0.22  |
| September                               | 0.99 (0.87 ,1.12) | 0.84  | 1.01 (0.95 ,1.08) | 0.73  | 0.98 (0.85 ,1.13)       | 0.79  | 0.99 (0.93 ,1.06) | 0.86  | 1.01 (0.88 ,1.16)                    | 0.91  | 1.04 (0.97 ,1.1)  | 0.28  |
| October                                 | 0.97 (0.84 ,1.12) | 0.69  | 0.98 (0.92 ,1.05) | 0.54  | 0.98 (0.84 ,1.15)       | 0.81  | 0.96 (0.89 ,1.02) | 0.20  | 1 (0.86 ,1.17)                       | 0.98  | 1 (0.93 ,1.07)    | 0.95  |
| November                                | 0.94 (0.82 ,1.09) | 0.43  | 0.99 (0.93 ,1.06) | 0.84  | 0.94 (0.81 ,1.1)        | 0.44  | 0.96 (0.9 ,1.03)  | 0.30  | 0.96 (0.83 ,1.12)                    | 0.63  | 1 (0.94 ,1.07)    | 0.92  |
