# Supplementary material for: The COVID-19 Pandemic and Associated Inequities in Acute Myocardial Infarction Treatment and Outcomes
Source: PubMed Central journal article supplement (PMC10457721; doi:10.1001/jamanetworkopen.2023.30327), 2023-08-25
Supplement: jamanetwopen-e2330327-s002.pdf [file jamanetwopen-e2330327-s002.pdf]

## **Data Sharing Statement**

Glance. The COVID-19 Pandemic and Associated Inequities in Acute Myocardial Infarction Treatment and Outcomes. *JAMA Netw Open*. Published online August 25, 2023.  
doi:10.1001/jamanetworkopen.2023.30327

### **Data**

**Data available:** No
